# Supplementary material
Source: publisher figshare collection journal article supplement (https://acs.figshare.com/ndownloader/files/5691912)
Supplement: Supplementary file 1 [file 5691912]

# ic010745l.cif

data_eu5

_audit_creation_method            SHELXL-97
_chemical_name_systematic
;
 ?
;
_chemical_name_common             ?
_chemical_melting_point           ?
_chemical_formula_moiety          'C39 H91 Eu5 O14'
_chemical_formula_sum
 'C39 H91 Eu5 O14'
_chemical_formula_weight          1543.92

loop_
 _atom_type_symbol
 _atom_type_description
 _atom_type_scat_dispersion_real
 _atom_type_scat_dispersion_imag
 _atom_type_scat_source
 'C'  'C'    .0033    .0016
 'International Tables Vol C Tables 4.2.6.8 and 6.1.1.4'
 'H'  'H'    .0000    .0000
 'International Tables Vol C Tables 4.2.6.8 and 6.1.1.4'
 'O'  'O'    .0106    .0060
 'International Tables Vol C Tables 4.2.6.8 and 6.1.1.4'
 'Eu'  'Eu'   -.1578   3.6682
 'International Tables Vol C Tables 4.2.6.8 and 6.1.1.4'

_symmetry_cell_setting            monoclinic
_symmetry_space_group_name_H-M    'P 21/n'

loop_
 _symmetry_equiv_pos_as_xyz
 'x, y, z'
 '-x+1/2, y+1/2, -z+1/2'
 '-x, -y, -z'
 'x-1/2, -y-1/2, z-1/2'

_cell_length_a                    12.846(17)
_cell_length_b                    21.54(3)
_cell_length_c                    21.654(19)
_cell_angle_alpha                 90.00
_cell_angle_beta                  91.49(10)
_cell_angle_gamma                 90.00
_cell_volume                      5990(12)
_cell_formula_units_Z             4
_cell_measurement_temperature     170(2)
_cell_measurement_reflns_used     20
_cell_measurement_theta_min       3
_cell_measurement_theta_max       14

_exptl_crystal_description        irregular
_exptl_crystal_colour             colorless
_exptl_crystal_size_max           0.5
_exptl_crystal_size_mid           0.4
_exptl_crystal_size_min           0.3
_exptl_crystal_density_meas       ?
_exptl_crystal_density_diffrn     1.712
_exptl_crystal_density_method     'not measured'
_exptl_crystal_F_000              3008
_exptl_absorpt_coefficient_mu     5.206
_exptl_absorpt_correction_type    empirical
_exptl_absorpt_correction_T_min   0.0076
_exptl_absorpt_correction_T_max   0.0395
_exptl_absorpt_process_details
;
    Psi Scan Reflections used    Mu * R = 3.12

    H   K   L   2Theta   Chi   Imin/Imax
   -4   2   1    13.3    78.1    0.484
    4  -2  -1    13.3   -78.1    0.412
   -4  -2   1    13.3    45.1    0.402
    4   2  -1    13.3   -45.1    0.350
   -4   4   1    14.8    87.6    0.590
   -5   3   0    16.8    78.0    0.431
    5  -4  -2    17.9   -84.9    0.460
   -5  -4   2    17.9    36.4    0.415
   -5   5   0    18.5    81.7    0.514
    5  -5   0    18.5   -81.7    0.432
   -5  -5   0    18.5    30.1    0.298
    5   5   0    18.5   -30.1    0.303
   -6   8   0    24.4    77.3    0.504
    7  -7  -1    26.0   -85.6    0.397
   -7   7   1    26.0    85.6    0.541
    7   7  -1    26.0   -30.6    0.366
   -7  -7   1    26.0    30.6    0.350
;

_diffrn_ambient_temperature       170(2)
_diffrn_radiation_wavelength      0.71073
_diffrn_radiation_type            MoK\a
_diffrn_radiation_source          'fine-focus sealed tube'
_diffrn_radiation_monochromator   graphite
_diffrn_measurement_device_type   'STOE-4'
_diffrn_measurement_method
; Scan width (omega) = 1.11 - 1.26, scan ratio 2theta:omega = 1.00
;
_diffrn_standards_number          4
_diffrn_standards_decay_%         15.7
_diffrn_standards_interval_time   360
_diffrn_reflns_number             11129
_diffrn_reflns_av_R_equivalents   0.1118
_diffrn_reflns_av_sigmaI/netI     0.0957
_diffrn_reflns_limit_h_min    éÌÐ      V Ð éÐ  þd 
2]èÐÅ òÍÐ é  ÅÓ Þ ðé¸ÐÞ éÐ ðý Þ  ¯¸ ¯Ð éÞþý 
ÞÐ éÞ ÐÐéÞý Ð éÐÐéÞÞ¯ý ÞéÏÐ       ýÞ ÐÐéÞý 
ð¯Ð ðÞý ÞðÐ
@¸þ2]ÞÐÅ ãÍÐ é  Å¸ ðéÐ ý ý¸Ð é ÞÐ é   ¯¸ Ð 
Ù ÞÐ Þ Ð ýÐ Ò ýéÓÐ    éÐÐ  Ú Ð ÞÐ èý ýÐ
9Vd+]+¤ÞèÐÅ¸  ÍÐ é  Å¸ ðÐ ý¨ ý¸Ð é ¸ð¯Ð + 
¸  ¯¸ Ð é ¨Å+¸  ¸¯Ð Þ¨   ¯ýÐÐÞ ¸V 
Å¸ ÞéÐ    éÐé  ¸ ¨ ¸¸ ¸  VÞTADI4 (STOE, 1996)'
_computing_data_reduction        'X-RED  (STOE, 1996)'
_computing_structure_solution     'SHELXS-97 (Sheldrick, 1990)'
_computing_structure_refinement   'SHELXL-97 (Sheldrick, 1997)'
_computing_molecular_graphics     ?
_computing_publication_material   ?

_refine_special_details
;
 Refinement of F^2^ against ALL reflections.  The weighted R-factor wR and
 goodness of fit S are based on F^2^, conventional R-factors R are based
 on F, with F set to zero for negative F^2^. The threshold expression of
 F^2^ > 2sigma(F^2^) is used only for calculating R-factors(gt) etc. and is
 not relevant to the choice of reflections for refinement.  R-factors based
 on F^2^ are statistically about twice as large as those based on F, and R-
 factors based on ALL data will be even larger.
;

_refine_ls_structure_factor_coef  Fsqd
_refine_ls_matrix_type            full
_refine_ls_weighting_scheme       calc
_refine_ls_weighting_details
 'calc w=1/[\s^2^(Fo^2^)+(0.1576P)^2^+60.3075P] where P=(Fo^2^+2Fc^2^)/3'
_atom_sites_solution_primary      direct
_atom_sites_solution_secondary    difmap
_atom_sites_solution_hydrogens    geom
_refine_ls_hydrogen_treatment     constr
_refine_ls_extinction_method      SHELXL
_refine_ls_extinction_coef        0.00009(6)
_refine_ls_extinction_expression
 'Fc^*^=kFc[1+0.001xFc^2^\l^3^/sin(2\q)]^-1/4^'
_refine_ls_number_reflns          3888
_refine_ls_number_parameters      325
_refine_ls_number_restraints      29
_refine_ls_R_factor_all           0.1762
_refine_ls_R_factor_gt            0.0797
_refine_ls_wR_factor_ref          0.2166
_refine_ls_wR_factor_gt           0.2171
_refine_ls_goodness_of_fit_ref    1.067
_refine_ls_restrained_S_all       1.066
_refine_ls_shift/su_max           0.006
_refine_ls_shift/su_mean          0.000

loop_
 _atom_site_label
 _atom_site_type_symbol
 _atom_site_fract_x
 _atom_site_fract_y
 _atom_site_fract_z
 _atom_site_U_iso_or_equiv
 _atom_site_adp_type
 _atom_site_occupancy
 _atom_site_symmetry_multiplicity
 _atom_site_calc_flag
 _atom_site_refinement_flags
 _atom_site_disorder_assembly
 _atom_site_disorder_group
Eu1 Eu 0.58998(13) 0.81666(8) 0.10489(7) 0.0790(5) Uani 1 1 d . . .
Eu2 Eu 0.55258(13) 0.68343(9) 0.28194(7) 0.0821(6) Uani 1 1 d . . .
Eu3 Eu 0.72307(12) 0.69082(9) 0.16279(7) 0.0770(5) Uani 1 1 d . . .
Eu4 Eu 0.41675(13) 0.80744(8) 0.22228(7) 0.0751(5) Uani 1 1 d . . .
Eu5 Eu 0.45323(12) 0.67481(7) 0.12696(7) 0.0682(5) Uani 1 1 d . . .
O1 O 0.4089(15) 0.7822(10) 0.1113(8) 0.074(5) Uani 1 1 d . . .
O2 O 0.6041(15) 0.7061(11) 0.0733(7) 0.084(6) Uani 1 1 d . . .
O3 O 0.5798(16) 0.6205(11) 0.1869(9) 0.090(6) Uani 1 1 d . . .
O4 O 0.3863(14) 0.6966(9) 0.2239(8) 0.072(5) Uani 1 1 d . . .
O5 O 0.7280(12) 0.6912(9) 0.2688(8) 0.070(5) Uani 1 1 d . . .
O6 O 0.4941(17) 0.7792(12) 0.3139(8) 0.093(7) Uani 1 1 d D . .
O7 O 0.7556(16) 0.7895(12) 0.1313(10) 0.101(7) Uani 1 1 d D . .
O8 O 0.5228(16) 0.8793(9) 0.1791(10) 0.084(6) Uani 1 1 d . . .
O9 O 0.527(2) 0.6208(13) 0.3518(10) 0.124(9) Uani 1 1 d . . .
O10 O 0.3597(18) 0.6162(11) 0.0737(11) 0.112(8) Uani 1 1 d D . .
O11 O 0.847(2) 0.6350(14) 0.1298(13) 0.140(11) Uani 1 1 d D . .
O12 O 0.276(2) 0.8489(13) 0.2408(12) 0.121(9) Uani 1 1 d D . .
O13 O 0.601(2) 0.8664(11) 0.0230(11) 0.130(10) Uani 1 1 d . . .
O14 O 0.5631(12) 0.7423(9) 0.1873(8) 0.067(5) Uani 1 1 d . . .
C1 C 0.331(3) 0.8002(19) 0.0659(18) 0.108(12) Uiso 1 1 d . . .
H1 H 0.3523 0.7858 0.0241 0.130 Uiso 1 1 calc R . .
C2 C 0.643(4) 0.697(2) 0.0087(19) 0.129(14) Uiso 1 1 d D . .
H2 H 0.7047 0.7219 -0.0029 0.155 Uiso 1 1 calc R . .
C3 C 0.592(4) 0.552(2) 0.1942(19) 0.142(16) Uiso 1 1 d D . .
H3 H 0.5283 0.5394 0.2167 0.170 Uiso 1 1 calc R . .
C4 C 0.297(3) 0.670(2) 0.2503(19) 0.118(13) Uiso 1 1 d . . .
H4 H 0.2389 0.6861 0.2234 0.142 Uiso 1 1 calc R . .
C5 C 0.805(4) 0.686(2) 0.315(2) 0.150(18) Uiso 1 1 d . . .
H5 H 0.8087 0.6402 0.3217 0.180 Uiso 1 1 calc R . .
C6 C 0.467(4) 0.803(3) 0.3720(17) 0.22(3) Uiso 1 1 d D . .
H6 H 0.3924 0.7946 0.3814 0.270 Uiso 1 1 calc R . .
C7 C 0.860(3) 0.812(3) 0.132(2) 0.24(3) Uiso 1 1 d D . .
H7 H 0.9031 0.7807 0.1556 0.284 Uiso 1 1 calc R . .
C8 C 0.525(5) 0.944(3) 0.191(3) 0.18(2) Uiso 1 1 d D . .
H8 H 0.5616 0.9428 0.2324 0.215 Uiso 1 1 calc R . .
C9 C 0.513(7) 0.581(4) 0.400(4) 0.25(3) Uiso 1 1 d . . .
H9 H 0.4616 0.6026 0.4263 0.305 Uiso 1 1 calc R . .
C10 C 0.322(4) 0.571(2) 0.030(2) 0.19(2) Uiso 1 1 d D . .
H10 H 0.3798 0.5554 0.0044 0.233 Uiso 1 1 calc R . .
C11 C 0.929(4) 0.591(3) 0.124(3) 0.27(4) Uiso 1 1 d D . .
H11 H 0.9305 0.5592 0.1579 0.319 Uiso 1 1 calc R . .
C12 C 0.171(3) 0.868(3) 0.249(3) 0.19(2) Uiso 1 1 d D . .
H12 H 0.1374 0.8579 0.2077 0.231 Uiso 1 1 calc R . .
C13 C 0.630(5) 0.902(3) -0.034(3) 0.18(2) Uiso 1 1 d D . .
H13 H 0.6936 0.8816 -0.0499 0.220 Uiso 1 1 calc R . .
C14 C 0.225(4) 0.771(3) 0.082(2) 0.18(2) Uiso 1 1 d . . .
H14A H 0.1957 0.7932 0.1168 0.211 Uiso 1 1 calc R . .
H14B H 0.2346 0.7273 0.0921 0.211 Uiso 1 1 calc R . .
H14C H 0.1770 0.7747 0.0458 0.211 Uiso 1 1 calc R . .
C15 C 0.315(4) 0.867(2) 0.065(2) 0.161(19) Uiso 1 1 d . . .
H15A H 0.2513 0.8764 0.0406 0.193 Uiso 1 1 calc R . .
H15B H 0.3745 0.8871 0.0458 0.193 Uiso 1 1 calc R . .
H15C H 0.3081 0.8822 0.1071 0.193 Uiso 1 1 calc R . .
C16 C 0.539(4) 0.706(2) -0.033(2) 0.152(18) Uiso 1 1 d . . .
H16A H 0.5361 0.6738 -0.0657 0.183 Uiso 1 1 calc R . .
H16B H 0.5396 0.7469 -0.0524 0.183 Uiso 1 1 calc R . .
H16C H 0.4778 0.7018 -0.0075 0.183 Uiso 1 1 calc R . .
C17 C 0.654(5) 0.627(2) 0.002(3) 0.23(3) Uiso 1 1 d D . .
H17A H 0.7232 0.6144 0.0178 0.280 Uiso 1 1 calc R . .
H17B H 0.6455 0.6155 -0.0412 0.280 Uiso 1 1 calc R . .
H17C H 0.6005 0.6065 0.0265 0.280 Uiso 1 1 calc R . .
C18 C 0.674(4) 0.533(2) 0.233(2) 0.154(17) Uiso 1 1 d . . .
H18A H 0.6645 0.4888 0.2435 0.184 Uiso 1 1 calc R . .
H18B H 0.6764 0.5577 0.2705 0.184 Uiso 1 1 calc R . .
H18C H 0.7401 0.5374 0.2112 0.184 Uiso 1 1 calc R . .
C19 C 0.577(4) 0.523(3) 0.131(2) 0.19(2) Uiso 1 1 d D . .
H19A H 0.5213 0.5455 0.1081 0.230 Uiso 1 1 calc R . .
H19B H 0.5575 0.4797 0.1354 0.230 Uiso 1 1 calc R . .
H19C H 0.6418 0.5265 0.1084 0.230 Uiso 1 1 calc R . .
C20 C 0.291(4) 0.604(3) 0.239(2) 0.18(2) Uiso 1 1 d . . .
H20A H 0.3433 0.5827 0.2657 0.215 Uiso 1 1 calc R . .
H20B H 0.3052 0.5954 0.1959 0.215 Uiso 1 1 calc R . .
H20C H 0.2217 0.5889 0.2490 0.215 Uiso 1 1 calc R . .
C21 C 0.266(5) 0.687(3) 0.310(3) 0.22(3) Uiso 1 1 d . . .
H21A H 0.3192 0.6733 0.3409 0.270 Uiso 1 1 calc R . .
H21B H 0.1995 0.6677 0.3193 0.270 Uiso 1 1 calc R . .
H21C H 0.2595 0.7323 0.3125 0.270 Uiso 1 1 calc R . .
C22 C 0.908(5) 0.700(3) 0.288(3) 0.21(3) Uiso 1 1 d D . .
H22A H 0.9131 0.6783 0.2482 0.247 Uiso 1 1 calc R . .
H22B H 0.9634 0.6848 0.3163 0.247 Uiso 1 1 calc R . .
H22C H 0.9151 0.7444 0.2819 0.247 Uiso 1 1 calc R . .
C23 C 0.805(6) 0.711(4) 0.380(3) 0.27(4) Uiso 1 1 d D . .
H23A H 0.8676 0.6973 0.4022 0.328 Uiso 1 1 calc R . .
H23B H 0.7430 0.6956 0.4005 0.328 Uiso 1 1 calc R . .
H23C H 0.8028 0.7565 0.3784 0.328 Uiso 1 1 calc R . .
C24 C 0.541(6) 0.773(3) 0.419(3) 0.27(4) Uiso 1 1 d D . .
H24A H 0.6105 0.7918 0.4148 0.325 Uiso 1 1 calc R . .
H24B H 0.5449 0.7287 0.4105 0.325 Uiso 1 1 calc R . .
H24C H 0.5162 0.7804 0.4603 0.325 Uiso 1 1 calc R . .
C25 C 0.489(5) 0.873(3) 0.369(3) 0.22(3) Uiso 1 1 d D . .
H25A H 0.4341 0.8952 0.3902 0.263 Uiso 1 1 calc R . .
H25B H 0.4914 0.8858 0.3262 0.263 Uiso 1 1 calc R . .
H25C H 0.5564 0.8811 0.3900 0.263 Uiso 1 1 calc R . .
C26 C 0.909(4) 0.819(3) 0.070(3) 0.25(3) Uiso 1 1 d D . .
H26A H 0.9481 0.8577 0.0688 0.295 Uiso 1 1 calc R . .
H26B H 0.8540 0.8194 0.0374 0.295 Uiso 1 1 calc R . .
H26C H 0.9558 0.7838 0.0627 0.295 Uiso 1 1 calc R . .
C27 C 0.862(6) 0.871(3) 0.169(3) 0.27(4) Uiso 1 1 d D . .
H27A H 0.8837 0.8620 0.2116 0.325 Uiso 1 1 calc R . .
H27B H 0.7916 0.8892 0.1684 0.325 Uiso 1 1 calc R . .
H27C H 0.9104 0.9004 0.1507 0.325 Uiso 1 1 calc R . .
C28 C 0.448(4) 0.983(3) 0.206(2) 0.19(2) Uiso 1 1 d D . .
H28A H 0.3908 0.9791 0.1750 0.225 Uiso 1 1 calc R . .
H28B H 0.4736 1.0255 0.2067 0.225 Uiso 1 1 calc R . .
H28C H 0.4220 0.9717 0.2467 0.225 Uiso 1 1 calc R . .
C29 C 0.613(4) 0.972(3) 0.154(3) 0.25(3) Uiso 1 1 d D . .
H29A H 0.5848 1.0041 0.1267 0.301 Uiso 1 1 calc R . .
H29B H 0.6453 0.9392 0.1301 0.301 Uiso 1 1 calc R . .
H29C H 0.6648 0.9901 0.1829 0.301 Uiso 1 1 calc R . .
C30 C 0.612(7) 0.566(5) 0.445(4) 0.36(4) Uiso 1 1 d D . .
H30A H 0.5870 0.5585 0.4873 0.438 Uiso 1 1 calc R . .
H30B H 0.6603 0.6006 0.4459 0.438 Uiso 1 1 calc R . .
H30C H 0.6469 0.5283 0.4308 0.438 Uiso 1 1 calc R . .
C31 C 0.467(7) 0.520(5) 0.387(5) 0.36(4) Uiso 1 1 d D . .
H31A H 0.4014 0.5255 0.3634 0.438 Uiso 1 1 calc R . .
H31B H 0.4544 0.4989 0.4256 0.438 Uiso 1 1 calc R . .
H31C H 0.5155 0.4957 0.3622 0.438 Uiso 1 1 calc R . .
C32 C 0.244(5) 0.606(3) -0.009(3) 0.23(3) Uiso 1 1 d D . .
H32A H 0.2510 0.5946 -0.0527 0.278 Uiso 1 1 calc R . .
H32B H 0.2557 0.6509 -0.0045 0.278 Uiso 1 1 calc R . .
H32C H 0.1731 0.5961 0.0037 0.278 Uiso 1 1 calc R . .
C33 C 0.270(5) 0.518(3) 0.063(3) 0.25(3) Uiso 1 1 d D . .
H33A H 0.2493 0.5316 0.1038 0.300 Uiso 1 1 calc R . .
H33B H 0.3187 0.4832 0.0668 0.300 Uiso 1 1 calc R . .
H33C H 0.2081 0.5049 0.0387 0.300 Uiso 1 1 calc R . .
C34 C 1.022(6) 0.635(4) 0.127(4) 0.31(3) Uiso 1 1 d D . .
H34A H 1.0833 0.6146 0.1106 0.367 Uiso 1 1 calc R . .
H34B H 1.0358 0.6478 0.1697 0.367 Uiso 1 1 calc R . .
H34C H 1.0058 0.6722 0.1018 0.367 Uiso 1 1 calc R . .
C35 C 0.930(6) 0.561(4) 0.060(3) 0.31(3) Uiso 1 1 d D . .
H35A H 0.8628 0.5411 0.0513 0.367 Uiso 1 1 calc R . .
H35B H 0.9858 0.5306 0.0587 0.367 Uiso 1 1 calc R . .
H35C H 0.9415 0.5937 0.0292 0.367 Uiso 1 1 calc R . .
C36 C 0.097(6) 0.839(3) 0.294(3) 0.27(3) Uiso 1 1 d D . .
H36A H 0.1053 0.8591 0.3340 0.322 Uiso 1 1 calc R . .
H36B H 0.1122 0.7945 0.2979 0.322 Uiso 1 1 calc R . .
H36C H 0.0251 0.8443 0.2781 0.322 Uiso 1 1 calc R . .
C37 C 0.158(6) 0.938(3) 0.253(3) 0.27(3) Uiso 1 1 d D . .
H37A H 0.1368 0.9542 0.2126 0.322 Uiso 1 1 calc R . .
H37B H 0.2248 0.9564 0.2662 0.322 Uiso 1 1 calc R . .
H37C H 0.1052 0.9475 0.2833 0.322 Uiso 1 1 calc R . .
C38 C 0.544(5) 0.885(3) -0.080(3) 0.25(2) Uiso 1 1 d D . .
H38A H 0.4764 0.8897 -0.0604 0.305 Uiso 1 1 calc R . .
H38B H 0.5530 0.8420 -0.0931 0.305 Uiso 1 1 calc R . .
H38C H 0.5464 0.9126 -0.1160 0.305 Uiso 1 1 calc R . .
C39 C 0.663(5) 0.969(3) -0.020(3) 0.25(2) Uiso 1 1 d D . .
H39A H 0.6958 0.9866 -0.0564 0.305 Uiso 1 1 calc R . .
H39B H 0.7125 0.9687 0.0150 0.305 Uiso 1 1 calc R . .
H39C H 0.6015 0.9932 -0.0099 0.305 Uiso 1 1 calc R . .

loop_
 _atom_site_aniso_label
 _atom_site_aniso_U_11
 _atom_site_aniso_U_22
 _atom_site_aniso_U_33
 _atom_site_aniso_U_23
 _atom_site_aniso_U_13
 _atom_site_aniso_U_12
Eu1 0.0810(11) 0.0711(11) 0.0852(10) 0.0092(8) 0.0062(8) -0.0036(9)
Eu2 0.0836(12) 0.0989(14) 0.0634(8) 0.0102(9) -0.0062(7) 0.0030(10)
Eu3 0.0590(10) 0.0926(14) 0.0789(9) 0.0012(8) -0.0063(7) 0.0033(9)
Eu4 0.0743(11) 0.0747(12) 0.0764(9) -0.0074(8) 0.0011(7) 0.0013(9)
Eu5 0.0625(9) 0.0667(10) 0.0749(8) -0.0071(8) -0.0116(6) -0.0045(8)
O1 0.066(13) 0.096(16) 0.061(10) 0.003(10) 0.008(9) 0.011(11)
O2 0.070(13) 0.14(2) 0.043(9) 0.006(10) 0.008(8) -0.006(12)
O3 0.079(15) 0.097(18) 0.092(13) -0.002(12) -0.008(11) 0.005(12)
O4 0.067(12) 0.070(13) 0.078(11) -0.008(9) 0.003(9) -0.021(10)
O5 0.036(9) 0.086(15) 0.088(12) -0.005(10) -0.021(9) 0.006(9)
O6 0.096(16) 0.13(2) 0.049(10) -0.001(11) 0.005(10) -0.002(14)
O7 0.056(14) 0.13(2) 0.121(17) -0.010(15) 0.001(12) -0.007(13)
O8 0.084(15) 0.056(13) 0.114(15) -0.019(11) 0.019(12) -0.006(11)
O9 0.16(2) 0.13(2) 0.078(14) 0.052(14) 0.004(15) -0.018(19)
O10 0.098(17) 0.100(18) 0.135(18) -0.050(15) -0.048(15) -0.009(14)
O11 0.13(2) 0.13(2) 0.16(2) 0.011(19) -0.049(19) 0.05(2)
O12 0.106(19) 0.12(2) 0.15(2) 0.004(17) 0.062(16) 0.028(16)
O13 0.20(3) 0.078(17) 0.114(17) 0.033(15) -0.025(18) -0.026(19)
O14 0.036(10) 0.091(15) 0.075(10) 0.001(10) -0.001(8) -0.032(9)

_geom_special_details
;
 All esds (except the esd in the dihedral angle between two l.s. planes)
 are estimated using the full covariance matrix.  The cell esds are taken
 into account individually in the estimation of esds in distances, angles
 and torsion angles; correlations between esds in cell parameters are only
 used when they are defined by crystal symmetry.  An approximate (isotropic)
 treatment of cell esds is used for estimating esds involving l.s. planes.
;

loop_
 _geom_bond_atom_site_label_1
 _geom_bond_atom_site_label_2
 _geom_bond_distance
 _geom_bond_site_symmetry_2
 _geom_bond_publ_flag
Eu1 O13 2.08(2) . ?
Eu1 O7 2.27(2) . ?
Eu1 O8 2.28(2) . ?
Eu1 O14 2.430(18) . ?
Eu1 O1 2.45(2) . ?
Eu1 O2 2.48(2) . ?
Eu1 Eu3 3.425(4) . ?
Eu1 Eu4 3.427(4) . ?
Eu1 Eu5 3.563(4) . ?
Eu2 O9 2.06(2) . ?
Eu2 O5 2.285(17) . ?
Eu2 O6 2.31(2) . ?
Eu2 O14 2.416(18) . ?
Eu2 O4 2.467(19) . ?
Eu2 O3 2.50(2) . ?
Eu2 Eu4 3.425(4) . ?
Eu2 Eu3 3.431(4) . ?
Eu2 Eu5 3.564(4) . ?
Eu3 O11 2.13(3) . ?
Eu3 O7 2.28(3) . ?
Eu3 O5 2.295(18) . ?
Eu3 O14 2.406(19) . ?
Eu3 O3 2.45(2) . ?
Eu3 O2 2.459(17) . ?
Eu3 C7 3.22(4) . ?
Eu3 Eu5 3.549(5) . ?
Eu4 O12 2.07(2) . ?
Eu4 O8 2.28(2) . ?
Eu4 O6 2.278(19) . ?
Eu4 O4 2.419(18) . ?
Eu4 O1 2.462(17) . ?
Eu4 O14 2.48(2) . ?
Eu4 Eu5 3.562(4) . ?
Eu5 O10 2.073(19) . ?
Eu5 O4 2.336(18) . ?
Eu5 O3 2.36(2) . ?
Eu5 O2 2.382(18) . ?
Eu5 O14 2.391(16) . ?
Eu5 O1 2.40(2) . ?
O1 C1 1.44(4) . ?
O2 C2 1.51(5) . ?
O3 C3 1.49(5) . ?
O4 C4 1.42(4) . ?
O5 C5 1.39(5) . ?
O6 C6 1.41(2) . ?
O7 C7 1.42(2) . ?
O8 C8 1.42(6) . ?
O9 C9 1.36(8) . ?
O10 C10 1.43(2) . ?
O11 C11 1.43(2) . ?
O12 C12 1.42(2) . ?
O13 C13 1.52(6) . ?
C1 C15 1.45(6) . ?
C1 C14 1.55(6) . ?
C2 C17 1.51(2) . ?
C2 C16 1.61(6) . ?
C3 C18 1.40(5) . ?
C3 C19 1.51(2) . ?
C4 C21 1.42(7) . ?
C4 C20 1.44(6) . ?
C5 C22 1.48(7) . ?
C5 C23 1.50(7) . ?
C6 C24 1.51(2) . ?
C6 C25 1.52(2) . ?
C7 C26 1.50(2) . ?
C7 C27 1.51(2) . ?
C8 C28 1.34(6) . ?
C8 C29 1.52(2) . ?
C9 C31 1.46(10) . ?
C9 C30 1.63(10) . ?
C10 C32 1.51(2) . ?
C10 C33 1.51(2) . ?
C11 C35 1.52(2) . ?
C11 C34 1.54(2) . ?
C12 C36 1.51(2) . ?
C12 C37 1.52(2) . ?
C13 C38 1.51(2) . ?
C13 C39 1.52(2) . ?

loop_
 _geom_angle_atom_site_label_1
 _geom_angle_atom_site_label_2
 _geom_angle_atom_site_label_3
 _geom_angle
 _geom_angle_site_symmetry_1
 _geom_angle_site_symmetry_3
 _geom_angle_publ_flag
O13 Eu1 O7 105.3(11) . . ?
O13 Eu1 O8 109.3(10) . . ?
O7 Eu1 O8 110.2(8) . . ?
O13 Eu1 O14 168.5(8) . . ?
O7 Eu1 O14 78.2(7) . . ?
O8 Eu1 O14 79.0(7) . . ?
O13 Eu1 O1 106.9(10) . . ?
O7 Eu1 O1 142.6(8) . . ?
O8 Eu1 O1 76.2(7) . . ?
O14 Eu1 O1 66.7(6) . . ?
O13 Eu1 O2 104.6(8) . . ?
O7 Eu1 O2 75.4(8) . . ?
O8 Eu1 O2 142.3(7) . . ?
O14 Eu1 O2 65.4(6) . . ?
O1 Eu1 O2 78.6(6) . . ?
O13 Eu1 Eu3 132.4(9) . . ?
O7 Eu1 Eu3 41.1(7) . . ?
O8 Eu1 Eu3 113.8(6) . . ?
O14 Eu1 Eu3 44.6(4) . . ?
O1 Eu1 Eu3 101.8(5) . . ?
O2 Eu1 Eu3 45.8(4) . . ?
O13 Eu1 Eu4 136.3(9) . . ?
O7 Eu1 Eu4 114.9(6) . . ?
O8 Eu1 Eu4 41.3(5) . . ?
O14 Eu1 Eu4 46.3(5) . . ?
O1 Eu1 Eu4 45.9(4) . . ?
O2 Eu1 Eu4 101.6(4) . . ?
Eu3 Eu1 Eu4 90.59(8) . . ?
O13 Eu1 Eu5 126.9(7) . . ?
O7 Eu1 Eu5 102.0(7) . . ?
O8 Eu1 Eu5 102.4(5) . . ?
O14 Eu1 Eu5 41.9(4) . . ?
O1 Eu1 Eu5 42.3(5) . . ?
O2 Eu1 Eu5 41.8(4) . . ?
Eu3 Eu1 Eu5 61.01(10) . . ?
Eu4 Eu1 Eu5 61.24(6) . . ?
O9 Eu2 O5 108.4(9) . . ?
O9 Eu2 O6 107.8(10) . . ?
O5 Eu2 O6 107.6(7) . . ?
O9 Eu2 O14 168.5(8) . . ?
O5 Eu2 O14 77.2(6) . . ?
O6 Eu2 O14 79.1(7) . . ?
O9 Eu2 O4 107.3(9) . . ?
O5 Eu2 O4 140.5(6) . . ?
O6 Eu2 O4 76.4(7) . . ?
O14 Eu2 O4 64.8(6) . . ?
O9 Eu2 O3 106.1(10) . . ?
O5 Eu2 O3 77.2(7) . . ?
O6 Eu2 O3 141.8(7) . . ?
O14 Eu2 O3 64.8(7) . . ?
O4 Eu2 O3 77.3(6) . . ?
O9 Eu2 Eu4 134.3(8) . . ?
O5 Eu2 Eu4 113.0(5) . . ?
O6 Eu2 Eu4 41.4(5) . . ?
O14 Eu2 Eu4 46.4(5) . . ?
O4 Eu2 Eu4 44.9(4) . . ?
O3 Eu2 Eu4 101.2(5) . . ?
O9 Eu2 Eu3 134.4(8) . . ?
O5 Eu2 Eu3 41.6(4) . . ?
O6 Eu2 Eu3 113.8(5) . . ?
O14 Eu2 Eu3 44.5(4) . . ?
O4 Eu2 Eu3 99.9(4) . . ?
O3 Eu2 Eu3 45.5(5) . . ?
Eu4 Eu2 Eu3 90.52(8) . . ?
O9 Eu2 Eu5 126.7(8) . . ?
O5 Eu2 Eu5 102.5(4) . . ?
O6 Eu2 Eu5 102.6(5) . . ?
O14 Eu2 Eu5 41.9(4) . . ?
O4 Eu2 Eu5 40.7(4) . . ?
O3 Eu2 Eu5 41.4(5) . . ?
Eu4 Eu2 Eu5 61.25(7) . . ?
Eu3 Eu2 Eu5 60.94(9) . . ?
O11 Eu3 O7 106.4(10) . . ?
O11 Eu3 O5 109.6(8) . . ?
O7 Eu3 O5 107.2(7) . . ?
O11 Eu3 O14 169.2(9) . . ?
O7 Eu3 O14 78.5(7) . . ?
O5 Eu3 O14 77.2(6) . . ?
O11 Eu3 O3 107.0(10) . . ?
O7 Eu3 O3 141.9(7) . . ?
O5 Eu3 O3 77.9(6) . . ?
O14 Eu3 O3 65.6(7) . . ?
O11 Eu3 O2 105.4(8) . . ?
O7 Eu3 O2 75.7(7) . . ?
O5 Eu3 O2 142.0(6) . . ?
O14 Eu3 O2 66.1(6) . . ?
O3 Eu3 O2 78.2(7) . . ?
O11 Eu3 C7 88.3(13) . . ?
O7 Eu3 C7 22.6(9) . . ?
O5 Eu3 C7 101.8(10) . . ?
O14 Eu3 C7 98.5(10) . . ?
O3 Eu3 C7 164.0(11) . . ?
O2 Eu3 C7 93.4(10) . . ?
O11 Eu3 Eu1 133.9(8) . . ?
O7 Eu3 Eu1 40.9(5) . . ?
O5 Eu3 Eu1 111.3(5) . . ?
O14 Eu3 Eu1 45.2(4) . . ?
O3 Eu3 Eu1 101.4(5) . . ?
O2 Eu3 Eu1 46.5(6) . . ?
C7 Eu3 Eu1 63.6(9) . . ?
O11 Eu3 Eu2 136.2(8) . . ?
O7 Eu3 Eu2 113.2(6) . . ?
O5 Eu3 Eu2 41.4(4) . . ?
O14 Eu3 Eu2 44.8(4) . . ?
O3 Eu3 Eu2 46.7(5) . . ?
O2 Eu3 Eu2 101.7(4) . . ?
C7 Eu3 Eu2 123.8(10) . . ?
Eu1 Eu3 Eu2 89.41(8) . . ?
O11 Eu3 Eu5 127.2(8) . . ?
O7 Eu3 Eu5 102.2(5) . . ?
O5 Eu3 Eu5 102.7(4) . . ?
O14 Eu3 Eu5 42.1(4) . . ?
O3 Eu3 Eu5 41.6(5) . . ?
O2 Eu3 Eu5 42.0(4) . . ?
C7 Eu3 Eu5 124.7(9) . . ?
Eu1 Eu3 Eu5 61.41(8) . . ?
Eu2 Eu3 Eu5 61.38(9) . . ?
O12 Eu4 O8 108.8(9) . . ?
O12 Eu4 O6 108.1(9) . . ?
O8 Eu4 O6 106.7(8) . . ?
O12 Eu4 O4 106.3(9) . . ?
O8 Eu4 O4 140.8(7) . . ?
O6 Eu4 O4 78.0(7) . . ?
O12 Eu4 O1 105.7(9) . . ?
O8 Eu4 O1 76.0(7) . . ?
O6 Eu4 O1 142.8(7) . . ?
O4 Eu4 O1 78.1(6) . . ?
O12 Eu4 O14 168.0(9) . . ?
O8 Eu4 O14 78.1(7) . . ?
O6 Eu4 O14 78.4(7) . . ?
O4 Eu4 O14 64.5(6) . . ?
O1 Eu4 O14 65.8(6) . . ?
O12 Eu4 Eu2 134.7(7) . . ?
O8 Eu4 Eu2 112.4(5) . . ?
O6 Eu4 Eu2 42.0(6) . . ?
O4 Eu4 Eu2 46.1(4) . . ?
O1 Eu4 Eu2 101.7(5) . . ?
O14 Eu4 Eu2 44.9(4) . . ?
O12 Eu4 Eu1 135.0(7) . . ?
O8 Eu4 Eu1 41.4(5) . . ?
O6 Eu4 Eu1 112.6(5) . . ?
O4 Eu4 Eu1 100.1(4) . . ?
O1 Eu4 Eu1 45.6(5) . . ?
O14 Eu4 Eu1 45.1(4) . . ?
Eu2 Eu4 Eu1 89.47(8) . . ?
O12 Eu4 Eu5 126.0(8) . . ?
O8 Eu4 Eu5 102.6(5) . . ?
O6 Eu4 Eu5 103.3(6) . . ?
O4 Eu4 Eu5 40.6(4) . . ?
O1 Eu4 Eu5 42.3(5) . . ?
O14 Eu4 Eu5 42.0(4) . . ?
Eu2 Eu4 Eu5 61.30(9) . . ?
Eu1 Eu4 Eu5 61.25(7) . . ?
O10 Eu5 O4 113.6(9) . . ?
O10 Eu5 O3 112.6(9) . . ?
O4 Eu5 O3 82.5(7) . . ?
O10 Eu5 O2 111.6(9) . . ?
O4 Eu5 O2 134.7(6) . . ?
O3 Eu5 O2 81.5(7) . . ?
O10 Eu5 O14 179.2(9) . . ?
O4 Eu5 O14 67.2(6) . . ?
O3 Eu5 O14 67.2(7) . . ?
O2 Eu5 O14 67.6(6) . . ?
O10 Eu5 O1 112.1(8) . . ?
O4 Eu5 O1 80.9(6) . . ?
O3 Eu5 O1 135.3(7) . . ?
O2 Eu5 O1 81.5(7) . . ?
O14 Eu5 O1 68.1(6) . . ?
O10 Eu5 Eu3 136.8(7) . . ?
O4 Eu5 Eu3 99.4(4) . . ?
O3 Eu5 Eu3 43.5(6) . . ?
O2 Eu5 Eu3 43.7(4) . . ?
O14 Eu5 Eu3 42.5(5) . . ?
O1 Eu5 Eu3 99.4(5) . . ?
O10 Eu5 Eu4 136.7(7) . . ?
O4 Eu5 Eu4 42.4(4) . . ?
O3 Eu5 Eu4 100.3(5) . . ?
O2 Eu5 Eu4 100.2(5) . . ?
O14 Eu5 Eu4 44.0(5) . . ?
O1 Eu5 Eu4 43.6(4) . . ?
Eu3 Eu5 Eu4 86.44(8) . . ?
O10 Eu5 Eu1 136.8(8) . . ?
O4 Eu5 Eu1 98.2(4) . . ?
O3 Eu5 Eu1 99.4(6) . . ?
O2 Eu5 Eu1 44.1(6) . . ?
O14 Eu5 Eu1 42.8(4) . . ?
O1 Eu5 Eu1 43.3(5) . . ?
Eu3 Eu5 Eu1 57.58(6) . . ?
Eu4 Eu5 Eu1 57.51(9) . . ?
O10 Eu5 Eu2 138.0(8) . . ?
O4 Eu5 Eu2 43.5(5) . . ?
O3 Eu5 Eu2 44.3(5) . . ?
O2 Eu5 Eu2 99.7(4) . . ?
O14 Eu5 Eu2 42.4(4) . . ?
O1 Eu5 Eu2 99.2(4) . . ?
Eu3 Eu5 Eu2 57.68(9) . . ?
Eu4 Eu5 Eu2 57.45(6) . . ?
Eu1 Eu5 Eu2 85.17(7) . . ?
C1 O1 Eu5 121(2) . . ?
C1 O1 Eu1 122(2) . . ?
Eu5 O1 Eu1 94.5(7) . . ?
C1 O1 Eu4 128(2) . . ?
Eu5 O1 Eu4 94.1(6) . . ?
Eu1 O1 Eu4 88.5(6) . . ?
C2 O2 Eu5 135(2) . . ?
C2 O2 Eu3 120(2) . . ?
Eu5 O2 Eu3 94.3(6) . . ?
C2 O2 Eu1 114(2) . . ?
Eu5 O2 Eu1 94.1(7) . . ?
Eu3 O2 Eu1 87.7(6) . . ?
C3 O3 Eu5 128(2) . . ?
C3 O3 Eu3 124(2) . . ?
Eu5 O3 Eu3 95.0(8) . . ?
C3 O3 Eu2 118(2) . . ?
Eu5 O3 Eu2 94.3(8) . . ?
Eu3 O3 Eu2 87.8(7) . . ?
C4 O4 Eu5 127(2) . . ?
C4 O4 Eu4 123(2) . . ?
Eu5 O4 Eu4 97.0(7) . . ?
C4 O4 Eu2 116(2) . . ?
Eu5 O4 Eu2 95.8(7) . . ?
Eu4 O4 Eu2 89.0(6) . . ?
C5 O5 Eu2 126(2) . . ?
C5 O5 Eu3 136(2) . . ?
Eu2 O5 Eu3 97.0(6) . . ?
C6 O6 Eu4 124(3) . . ?
C6 O6 Eu2 133(3) . . ?
Eu4 O6 Eu2 96.6(7) . . ?
C7 O7 Eu1 143(3) . . ?
C7 O7 Eu3 119(3) . . ?
Eu1 O7 Eu3 97.9(8) . . ?
C8 O8 Eu4 127(3) . . ?
C8 O8 Eu1 135(3) . . ?
Eu4 O8 Eu1 97.4(7) . . ?
C9 O9 Eu2 177(4) . . ?
C10 O10 Eu5 164(3) . . ?
C11 O11 Eu3 165(3) . . ?
C12 O12 Eu4 170(3) . . ?
C13 O13 Eu1 170(3) . . ?
Eu5 O14 Eu3 95.4(7) . . ?
Eu5 O14 Eu2 95.7(6) . . ?
Eu3 O14 Eu2 90.7(6) . . ?
Eu5 O14 Eu1 95.3(6) . . ?
Eu3 O14 Eu1 90.2(6) . . ?
Eu2 O14 Eu1 168.8(8) . . ?
Eu5 O14 Eu4 94.0(5) . . ?
Eu3 O14 Eu4 170.6(7) . . ?
Eu2 O14 Eu4 88.8(6) . . ?
Eu1 O14 Eu4 88.5(7) . . ?
O1 C1 C15 112(4) . . ?
O1 C1 C14 110(3) . . ?
C15 C1 C14 106(4) . . ?
C17 C2 O2 105(4) . . ?
C17 C2 C16 99(4) . . ?
O2 C2 C16 102(3) . . ?
C18 C3 O3 116(4) . . ?
C18 C3 C19 120(5) . . ?
O3 C3 C19 107(4) . . ?
O4 C4 C21 120(4) . . ?
O4 C4 C20 112(4) . . ?
C21 C4 C20 113(5) . . ?
O5 C5 C22 109(4) . . ?
O5 C5 C23 128(5) . . ?
C22 C5 C23 109(5) . . ?
O6 C6 C24 106(5) . . ?
O6 C6 C25 106(4) . . ?
C24 C6 C25 109(3) . . ?
O7 C7 C26 116(3) . . ?
O7 C7 C27 107(5) . . ?
C26 C7 C27 113(3) . . ?
O7 C7 Eu3 38.0(18) . . ?
C26 C7 Eu3 121(3) . . ?
C27 C7 Eu3 125(3) . . ?
C28 C8 O8 130(5) . . ?
C28 C8 C29 117(5) . . ?
O8 C8 C29 107(5) . . ?
O9 C9 C31 119(8) . . ?
O9 C9 C30 119(7) . . ?
C31 C9 C30 103(6) . . ?
O10 C10 C32 104(4) . . ?
O10 C10 C33 111(5) . . ?
C32 C10 C33 110(3) . . ?
O11 C11 C35 113(6) . . ?
O11 C11 C34 99(5) . . ?
C35 C11 C34 106(3) . . ?
O12 C12 C36 125(5) . . ?
O12 C12 C37 113(5) . . ?
C36 C12 C37 107(3) . . ?
C38 C13 C39 124(6) . . ?
C38 C13 O13 103(5) . . ?
C39 C13 O13 113(5) . . ?

_diffrn_measured_fraction_theta_max     .410
_diffrn_reflns_theta_full              24.07
_diffrn_measured_fraction_theta_full    .410
_refine_diff_density_max    1.553
_refine_diff_density_min   -1.145
_refine_diff_density_rms     .212

#===END

data_eual3

_audit_creation_method            SHELXL-97
_chemical_name_systematic
;
 ?
;
_chemical_name_common             ?
_chemical_melting_point           ?
_chemical_formula_moiety          'C36 H84 Al3 Eu O12'
_chemical_formula_sum             'C36 H84 Al3 Eu O12'
_chemical_formula_weight          941.93

loop_
 _atom_type_symbol
 _atom_type_description
 _atom_type_scat_dispersion_real
 _atom_type_scat_dispersion_imag
 _atom_type_scat_source
 'C'  'C'    .0033    .0016
 'International Tables Vol C Tables 4.2.6.8 and 6.1.1.4'
 'H'  'H'    .0000    .0000
 'International Tables Vol C Tables 4.2.6.8 and 6.1.1.4'
 'O'  'O'    .0106    .0060
 'International Tables Vol C Tables 4.2.6.8 and 6.1.1.4'
 'Al'  'Al'    .0645    .0514
 'International Tables Vol C Tables 4.2.6.8 and 6.1.1.4'
 'Eu'  'Eu'   -.1578   3.6682
 'International Tables Vol C Tables 4.2.6.8 and 6.1.1.4'

_symmetry_cell_setting            monoclinic
_symmetry_space_group_name_H-M    'P 21'

loop_
 _symmetry_equiv_pos_as_xyz
 'x, y, z'
 '-x, y+1/2, -z'

_cell_length_a                    13.146(2)
_cell_length_b                    22.738(2)
_cell_length_c                    16.971(3)
_cell_angle_alpha                 90.00
_cell_angle_beta                  90.0000(10)
_cell_angle_gamma                 90.00
_cell_volume                      5072.8(13)
_cell_formula_units_Z             4
_cell_measurement_temperature     120(2)
_cell_measurement_reflns_used     5000
_cell_measurement_theta_min       2.9
_cell_measurement_theta_max       23

_exptl_crystal_description        irregular
_exptl_crystal_colour             colorless
_exptl_crystal_size_max           0.5
_exptl_crystal_size_mid           0.4
_exptl_crystal_size_min           0.3
_exptl_crystal_density_meas       ?
_exptl_crystal_density_diffrn     1.233
_exptl_crystal_density_method     'not measured'
_exptl_crystal_F_000              1992
_exptl_absorpt_coefficient_mu     1.336
_exptl_absorpt_correction_type    numerical
_exptl_absorpt_correction_T_min   0.6422
_exptl_absorpt_correction_T_max   0.7119
_exptl_absorpt_process_details
 'X-SHAPE (STOE, 1996b), X-RED (STOE, 1996a)'

loop_
 _exptl_crystal_face_index_h
 _exptl_crystal_face_index_k
 _exptl_crystal_face_index_l
 _exptl_crystal_face_perp_dist
  -1  -8  13  0.1958
   1 -16   0  0.1849
   7  10   3  0.2265
 -10  11 -17  0.1894
  -4  -3  10  0.2525
  25 -10  -2  0.2009
  17  24  22  0.1848
 -10  19  -7  0.1461
  -9 -29  10  0.2265
  13   3 -21  0.2119
  -2   9   0  0.2089
   5  27 -28  0.2330
 -11 -16 -11  0.1826
  22 -21  18  0.1972
   1  30  23  0.2542
  -3  -5 -13  0.2009
  -4   0   1  0.2517
   2  -4   9  0.1546
   4  22  -5  0.1826
  -2 -13 -20  0.1973


_exptl_special_details
;
 ?
;

_diffrn_ambient_temperature       120(2)
_diffrn_radiation_wavelength      0.71073
_diffrn_radiation_type            MoK\a
_diffrn_radiation_source          'fine-focus sealed tube'
_diffrn_radiation_monochromator   graphite
_diffrn_measurement_device_type   'STOE IPDS'
_diffrn_measurement_method        'phi oscillation'
_diffrn_detector_area_resol_mean  6.67
_diffrn_reflns_number             15455
_diffrn_reflns_av_R_equivalents   0.0347
_diffrn_reflns_av_sigmaI/netI     0.0475
_diffrn_reflns_limit_h_min        -11
_diffrn_reflns_limit_h_max        15
_diffrn_reflns_limit_k_min        -21
_diffrn_reflns_limit_k_max        25
_diffrn_reflns_limit_l_min        -19
_diffrn_reflns_limit_l_max        19
_diffrn_reflns_theta_min          1.96
_diffrn_reflns_theta_max          24.14
_reflns_number_total              10872
_reflns_number_gt                 10401
_reflns_threshold_expression      >2sigma(I)

_computing_data_collection        'IPDS (STOE, 1996c)'
_computing_cell_refinement        'IPDS (STOE, 1996c)'
_computing_data_reduction         'IPDS (STOE, 1996c)'
_computing_structure_solution     'SHELXS-97 (Sheldrick, 1990)'
_computing_structure_refinement   'SHELXL-97 (Sheldrick, 1997)'
_computing_molecular_graphics     'DIAMOND (Brandenburg, 1999)'
_computing_publication_material   ?

_refine_special_details
;
 Refinement of F^2^ against ALL reflections.  The weighted R-factor wR and
 goodness of fit S are based on F^2^, conventional R-factors R are based
 on F, with F set to zero for negative F^2^. The threshold expression of
 F^2^ > 2sigma(F^2^) is used only for calculating R-factors(gt) etc. and is
 not relevant to the choice of reflections for refinement.  R-factors based
 on F^2^ are statistically about twice as large as those based on F, and R-
 factors based on ALL data will be even larger.
;

_refine_ls_structure_factor_coef  Fsqd
_refine_ls_matrix_type            full
_refine_ls_weighting_scheme       calc
_refine_ls_weighting_details
 'calc w=1/[\s^2^(Fo^2^)+(0.0702P)^2^+0.0000P] where P=(Fo^2^+2Fc^2^)/3'
_atom_sites_solution_primary      direct
_atom_sites_solution_secondary    difmap
_atom_sites_solution_hydrogens    geom
_refine_ls_hydrogen_treatment     constr
_refine_ls_extinction_method      none
_refine_ls_extinction_coef        ?
_refine_ls_abs_structure_details
 'Flack H D (1983), Acta Cryst. A39, 876-881'
_refine_ls_abs_structure_Flack    -0.049(14)
_refine_ls_number_reflns          10872
_refine_ls_number_parameters      925
_refine_ls_number_restraints      7
_refine_ls_R_factor_all           0.0364
_refine_ls_R_factor_gt            0.0336
_refine_ls_wR_factor_ref          0.0953
_refine_ls_wR_factor_gt           0.0924
_refine_ls_goodness_of_fit_ref    1.026
_refine_ls_restrained_S_all       1.026
_refine_ls_shift/su_max           0.002
_refine_ls_shift/su_mean          0.000

loop_
 _atom_site_label
 _atom_site_type_symbol
 _atom_site_fract_x
 _atom_site_fract_y
 _atom_site_fract_z
 _atom_site_U_iso_or_equiv
 _atom_site_adp_type
 _atom_site_occupancy
 _atom_site_symmetry_multiplicity
 _atom_site_calc_flag
 _atom_site_refinement_flags
 _atom_site_disorder_assembly
 _atom_site_disorder_group
Eu Eu 0.87727(4) 0.510492(19) 0.03372(3) 0.02008(12) Uani 1 1 d . . .
Al1 Al 0.7717(3) 0.63506(17) -0.0117(2) 0.0262(8) Uani 1 1 d . . .
Al2 Al 1.1142(3) 0.48620(17) -0.0041(2) 0.0291(8) Uani 1 1 d . . .
Al3 Al 0.7401(3) 0.41208(15) 0.12346(17) 0.0226(7) Uani 1 1 d . . .
O_1 O 0.8706(7) 0.6108(4) 0.0563(5) 0.032(2) Uani 1 1 d D A .
C_1 C 0.948(3) 0.636(3) 0.1074(19) 0.053(15) Uiso 0.33(4) 1 d PD A 1
H0_1 H 0.9764 0.6024 0.1373 0.064 Uiso 0.33(4) 1 calc PR A 1
C1_1 C 1.036(2) 0.6603(15) 0.061(2) 0.005(9) Uiso 0.33(4) 1 d PD A 1
H1A_1 H 1.0158 0.6965 0.0340 0.005 Uiso 0.33(4) 1 calc PR A 1
H1B_1 H 1.0579 0.6311 0.0219 0.005 Uiso 0.33(4) 1 calc PR A 1
H1C_1 H 1.0929 0.6688 0.0968 0.005 Uiso 0.33(4) 1 calc PR A 1
C2_1 C 0.907(4) 0.672(2) 0.1639(19) 0.041(12) Uiso 0.33(4) 1 d P A 1
H2A_1 H 0.9588 0.6994 0.1835 0.049 Uiso 0.33(4) 1 calc PR A 1
H2B_1 H 0.8810 0.6483 0.2076 0.049 Uiso 0.33(4) 1 calc PR A 1
H2C_1 H 0.8504 0.6949 0.1410 0.049 Uiso 0.33(4) 1 calc PR A 1
C_1 C 0.9287(15) 0.6593(10) 0.0876(12) 0.036(6) Uiso 0.67(4) 1 d PD A 2
H0A_1 H 0.8861 0.6957 0.0849 0.043 Uiso 0.67(4) 1 calc PR A 2
C1_1 C 1.0250(18) 0.6694(15) 0.0403(18) 0.052(8) Uiso 0.67(4) 1 d PD A 2
H1D_1 H 1.0519 0.6315 0.0222 0.062 Uiso 0.67(4) 1 calc PR A 2
H1E_1 H 1.0759 0.6889 0.0735 0.062 Uiso 0.67(4) 1 calc PR A 2
H1F_1 H 1.0097 0.6942 -0.0053 0.062 Uiso 0.67(4) 1 calc PR A 2
C2_1 C 0.9460(19) 0.6433(13) 0.1767(12) 0.043(7) Uiso 0.67(4) 1 d P A 2
H2D_1 H 0.8813 0.6461 0.2051 0.052 Uiso 0.67(4) 1 calc PR A 2
H2E_1 H 0.9951 0.6708 0.1998 0.052 Uiso 0.67(4) 1 calc PR A 2
H2F_1 H 0.9724 0.6031 0.1807 0.052 Uiso 0.67(4) 1 calc PR A 2
O_2 O 0.7547(5) 0.5601(3) -0.0405(5) 0.0224(15) Uani 1 1 d . A .
C_2 C 0.6688(9) 0.5352(6) -0.0847(6) 0.026(3) Uani 1 1 d . . .
H0_2 H 0.6906 0.4972 -0.1091 0.031 Uiso 1 1 calc R A .
C1_2 C 0.5820(9) 0.5233(5) -0.0282(7) 0.032(3) Uani 1 1 d . A .
H1A_2 H 0.6003 0.5376 0.0244 0.039 Uiso 1 1 calc R . .
H1B_2 H 0.5689 0.4809 -0.0260 0.039 Uiso 1 1 calc R . .
H1C_2 H 0.5208 0.5437 -0.0465 0.039 Uiso 1 1 calc R . .
C2_2 C 0.6391(10) 0.5769(6) -0.1485(7) 0.037(3) Uani 1 1 d . A .
H2A_2 H 0.6139 0.6135 -0.1250 0.045 Uiso 1 1 calc R . .
H2B_2 H 0.5856 0.5592 -0.1809 0.045 Uiso 1 1 calc R . .
H2C_2 H 0.6985 0.5855 -0.1815 0.045 Uiso 1 1 calc R . .
O_3 O 0.9991(6) 0.4986(4) -0.0628(4) 0.025(2) Uani 1 1 d . A .
C_3 C 1.0100(9) 0.5096(7) -0.1443(6) 0.031(3) Uani 1 1 d . . .
H0_3 H 1.0778 0.4942 -0.1613 0.037 Uiso 1 1 calc R A .
C1_3 C 0.9291(11) 0.4777(6) -0.1903(6) 0.039(3) Uani 1 1 d . A .
H1A_3 H 0.9255 0.4368 -0.1726 0.046 Uiso 1 1 calc R . .
H1B_3 H 0.9460 0.4788 -0.2465 0.046 Uiso 1 1 calc R . .
H1C_3 H 0.8632 0.4969 -0.1818 0.046 Uiso 1 1 calc R . .
C2_3 C 1.0075(13) 0.5755(7) -0.1606(8) 0.048(4) Uani 1 1 d . A .
H2A_3 H 0.9466 0.5926 -0.1364 0.058 Uiso 1 1 calc R . .
H2B_3 H 1.0058 0.5822 -0.2176 0.058 Uiso 1 1 calc R . .
H2C_3 H 1.0683 0.5940 -0.1382 0.058 Uiso 1 1 calc R . .
O_4 O 1.0388(7) 0.4875(4) 0.0832(4) 0.028(2) Uani 1 1 d . A .
C_4 C 1.0648(11) 0.4690(7) 0.1627(6) 0.042(4) Uani 1 1 d . . .
H0_4 H 1.0122 0.4846 0.1998 0.051 Uiso 1 1 calc R A .
C1_4 C 1.0649(12) 0.4032(7) 0.1679(8) 0.048(4) Uani 1 1 d . A .
H1A_4 H 0.9947 0.3890 0.1715 0.057 Uiso 1 1 calc R . .
H1B_4 H 1.1028 0.3909 0.2148 0.057 Uiso 1 1 calc R . .
H1C_4 H 1.0973 0.3868 0.1208 0.057 Uiso 1 1 calc R . .
C2_4 C 1.1664(12) 0.4945(9) 0.1850(8) 0.063(5) Uani 1 1 d . A .
H2A_4 H 1.2209 0.4700 0.1631 0.076 Uiso 1 1 calc R . .
H2B_4 H 1.1726 0.4956 0.2426 0.076 Uiso 1 1 calc R . .
H2C_4 H 1.1720 0.5345 0.1640 0.076 Uiso 1 1 calc R . .
O_5 O 0.7918(6) 0.4222(3) 0.0260(4) 0.0246(17) Uani 1 1 d . A .
C_5 C 0.7915(11) 0.3761(6) -0.0351(9) 0.040(3) Uani 1 1 d . . .
H0_5 H 0.7949 0.3967 -0.0871 0.047 Uiso 1 1 calc R A .
C1_5 C 0.8863(15) 0.3407(7) -0.0279(9) 0.061(4) Uani 1 1 d . A .
H1A_5 H 0.8823 0.3159 0.0192 0.073 Uiso 1 1 calc R . .
H1B_5 H 0.9449 0.3671 -0.0236 0.073 Uiso 1 1 calc R . .
H1C_5 H 0.8940 0.3158 -0.0747 0.073 Uiso 1 1 calc R . .
C2_5 C 0.6952(12) 0.3429(7) -0.0343(9) 0.060(5) Uani 1 1 d . A .
H2A_5 H 0.7080 0.3028 -0.0157 0.072 Uiso 1 1 calc R . .
H2B_5 H 0.6669 0.3415 -0.0877 0.072 Uiso 1 1 calc R . .
H2C_5 H 0.6467 0.3623 0.0010 0.072 Uiso 1 1 calc R . .
O_6 O 0.7961(6) 0.4819(4) 0.1487(4) 0.0206(17) Uani 1 1 d . A .
C_6 C 0.7721(9) 0.5163(6) 0.2170(6) 0.027(3) Uani 1 1 d . . .
H0_6 H 0.8308 0.5431 0.2275 0.032 Uiso 1 1 calc R A .
C1_6 C 0.6800(13) 0.5538(6) 0.2003(8) 0.044(4) Uani 1 1 d . A .
H1A_6 H 0.6920 0.5772 0.1527 0.053 Uiso 1 1 calc R . .
H1B_6 H 0.6676 0.5802 0.2450 0.053 Uiso 1 1 calc R . .
H1C_6 H 0.6205 0.5285 0.1923 0.053 Uiso 1 1 calc R . .
C2_6 C 0.7574(11) 0.4777(7) 0.2892(7) 0.041(3) Uani 1 1 d . A .
H2A_6 H 0.6853 0.4676 0.2947 0.049 Uiso 1 1 calc R . .
H2B_6 H 0.7802 0.4989 0.3363 0.049 Uiso 1 1 calc R . .
H2C_6 H 0.7974 0.4416 0.2833 0.049 Uiso 1 1 calc R . .
O_7 O 0.8285(7) 0.6792(5) -0.0781(5) 0.044(2) Uani 1 1 d . A .
C_7 C 0.8116(11) 0.7121(7) -0.1481(8) 0.046(3) Uani 1 1 d . . .
H0_7 H 0.7810 0.6855 -0.1886 0.055 Uiso 1 1 calc R A .
C1_7 C 0.9151(15) 0.7322(8) -0.1772(10) 0.073(6) Uani 1 1 d . A .
H1A_7 H 0.9491 0.7548 -0.1356 0.088 Uiso 1 1 calc R . .
H1B_7 H 0.9065 0.7571 -0.2239 0.088 Uiso 1 1 calc R . .
H1C_7 H 0.9565 0.6978 -0.1907 0.088 Uiso 1 1 calc R . .
C2_7 C 0.7427(15) 0.7634(8) -0.1366(8) 0.066(5) Uani 1 1 d . A .
H2A_7 H 0.6722 0.7496 -0.1328 0.079 Uiso 1 1 calc R . .
H2B_7 H 0.7493 0.7903 -0.1814 0.079 Uiso 1 1 calc R . .
H2C_7 H 0.7613 0.7840 -0.0879 0.079 Uiso 1 1 calc R . .
O_8 O 0.6637(7) 0.6590(4) 0.0320(6) 0.042(2) Uani 1 1 d . A .
C_8 C 0.6295(12) 0.7150(6) 0.0538(6) 0.041(3) Uani 1 1 d . . .
H0_8 H 0.6812 0.7447 0.0370 0.049 Uiso 1 1 calc R A .
C1_8 C 0.6200(19) 0.7170(8) 0.1430(8) 0.080(6) Uani 1 1 d . A .
H1A_8 H 0.6219 0.6769 0.1640 0.095 Uiso 1 1 calc R . .
H1B_8 H 0.5553 0.7356 0.1574 0.095 Uiso 1 1 calc R . .
H1C_8 H 0.6764 0.7398 0.1650 0.095 Uiso 1 1 calc R . .
C2_8 C 0.5301(14) 0.7296(8) 0.0156(9) 0.065(5) Uani 1 1 d . A .
H2A_8 H 0.5411 0.7379 -0.0404 0.078 Uiso 1 1 calc R . .
H2B_8 H 0.5005 0.7643 0.0411 0.078 Uiso 1 1 calc R . .
H2C_8 H 0.4835 0.6962 0.0211 0.078 Uiso 1 1 calc R . .
O_9 O 1.1697(8) 0.4197(4) -0.0163(5) 0.046(3) Uani 1 1 d . A .
C_9 C 1.228(3) 0.4072(18) -0.085(2) 0.046(9) Uiso 0.45(4) 1 d PD A 1
H0_9 H 1.2328 0.4417 -0.1218 0.056 Uiso 0.45(4) 1 calc PR A 1
C1_9 C 1.339(3) 0.3867(17) -0.0522(19) 0.052(11) Uiso 0.45(4) 1 d P A 1
H1A_9 H 1.3445 0.3965 0.0038 0.063 Uiso 0.45(4) 1 calc PR A 1
H1B_9 H 1.3928 0.4071 -0.0816 0.063 Uiso 0.45(4) 1 calc PR A 1
H1C_9 H 1.3467 0.3441 -0.0591 0.063 Uiso 0.45(4) 1 calc PR A 1
C2_9 C 1.173(4) 0.3559(19) -0.121(3) 0.072(13) Uiso 0.45(4) 1 d PD A 1
H2A_9 H 1.1861 0.3205 -0.0901 0.086 Uiso 0.45(4) 1 calc PR A 1
H2B_9 H 1.1974 0.3498 -0.1753 0.086 Uiso 0.45(4) 1 calc PR A 1
H2C_9 H 1.0999 0.3640 -0.1222 0.086 Uiso 0.45(4) 1 calc PR A 1
C_9 C 1.223(2) 0.3783(13) -0.0630(14) 0.041(8) Uiso 0.55(4) 1 d PD A 2
H0A_9 H 1.2699 0.3569 -0.0269 0.050 Uiso 0.55(4) 1 calc PR A 2
C1_9 C 1.287(3) 0.4093(16) -0.120(2) 0.062(10) Uiso 0.55(4) 1 d P A 2
H1D_9 H 1.2499 0.4437 -0.1401 0.074 Uiso 0.55(4) 1 calc PR A 2
H1E_9 H 1.3029 0.3828 -0.1638 0.074 Uiso 0.55(4) 1 calc PR A 2
H1F_9 H 1.3495 0.4220 -0.0943 0.074 Uiso 0.55(4) 1 calc PR A 2
C2_9 C 1.152(2) 0.3323(14) -0.0985(18) 0.059(9) Uiso 0.55(4) 1 d PD A 2
H2D_9 H 1.1096 0.3154 -0.0570 0.071 Uiso 0.55(4) 1 calc PR A 2
H2E_9 H 1.1930 0.3011 -0.1229 0.071 Uiso 0.55(4) 1 calc PR A 2
H2F_9 H 1.1091 0.3507 -0.1385 0.071 Uiso 0.55(4) 1 calc PR A 2
O_10 O 1.1885(7) 0.5473(4) -0.0143(6) 0.049(3) Uani 1 1 d . A .
C_10 C 1.2952(18) 0.5555(13) -0.0142(16) 0.027(7) Uiso 0.62(7) 1 d P A 1
H0_10 H 1.3288 0.5161 -0.0135 0.032 Uiso 0.62(7) 1 calc PR A 1
C1_10 C 1.320(3) 0.5864(17) -0.094(2) 0.058(10) Uiso 0.62(7) 1 d P A 1
H1A_10 H 1.3127 0.5581 -0.1375 0.069 Uiso 0.62(7) 1 calc PR A 1
H1B_10 H 1.3904 0.6010 -0.0932 0.069 Uiso 0.62(7) 1 calc PR A 1
H1C_10 H 1.2734 0.6194 -0.1024 0.069 Uiso 0.62(7) 1 calc PR A 1
C2_10 C 1.331(2) 0.5907(13) 0.0588(18) 0.046(9) Uiso 0.62(7) 1 d P A 1
H2A_10 H 1.2969 0.6290 0.0598 0.055 Uiso 0.62(7) 1 calc PR A 1
H2B_10 H 1.4048 0.5965 0.0561 0.055 Uiso 0.62(7) 1 calc PR A 1
H2C_10 H 1.3141 0.5688 0.1068 0.055 Uiso 0.62(7) 1 calc PR A 1
C_10 C 1.287(3) 0.565(2) -0.033(3) 0.037(12) Uiso 0.38(7) 1 d P A 2
H0A_10 H 1.3298 0.5304 -0.0213 0.044 Uiso 0.38(7) 1 calc PR A 2
C1_10 C 1.310(6) 0.579(4) -0.118(4) 0.08(2) Uiso 0.38(7) 1 d P A 2
H1D_10 H 1.3194 0.5420 -0.1470 0.100 Uiso 0.38(7) 1 calc PR A 2
H1E_10 H 1.3725 0.6023 -0.1211 0.100 Uiso 0.38(7) 1 calc PR A 2
H1F_10 H 1.2535 0.6010 -0.1412 0.100 Uiso 0.38(7) 1 calc PR A 2
C2_10 C 1.316(3) 0.6074(19) 0.024(3) 0.040(14) Uiso 0.38(7) 1 d P A 2
H2D_10 H 1.3165 0.6467 0.0005 0.047 Uiso 0.38(7) 1 calc PR A 2
H2E_10 H 1.3835 0.5979 0.0441 0.047 Uiso 0.38(7) 1 calc PR A 2
H2F_10 H 1.2667 0.6067 0.0678 0.047 Uiso 0.38(7) 1 calc PR A 2
O_11 O 0.6120(8) 0.4189(4) 0.1331(5) 0.040(2) Uani 1 1 d . A .
C_11 C 0.527(3) 0.3760(19) 0.1325(16) 0.026(9) Uiso 0.48(3) 1 d P A 1
H0_11 H 0.5523 0.3366 0.1149 0.031 Uiso 0.48(3) 1 calc PR A 1
C1_11 C 0.493(2) 0.3730(14) 0.2173(15) 0.037(8) Uiso 0.48(3) 1 d P A 1
H1A_11 H 0.5529 0.3682 0.2515 0.044 Uiso 0.48(3) 1 calc PR A 1
H1B_11 H 0.4474 0.3394 0.2244 0.044 Uiso 0.48(3) 1 calc PR A 1
H1C_11 H 0.4576 0.4094 0.2312 0.044 Uiso 0.48(3) 1 calc PR A 1
C2_11 C 0.444(3) 0.3990(17) 0.0747(18) 0.057(10) Uiso 0.48(3) 1 d P A 1
H2A_11 H 0.4458 0.4420 0.0731 0.068 Uiso 0.48(3) 1 calc PR A 1
H2B_11 H 0.3767 0.3860 0.0928 0.068 Uiso 0.48(3) 1 calc PR A 1
H2C_11 H 0.4567 0.3833 0.0218 0.068 Uiso 0.48(3) 1 calc PR A 1
C_11 C 0.520(3) 0.394(2) 0.131(2) 0.047(13) Uiso 0.52(3) 1 d P A 2
H0A_11 H 0.5125 0.3792 0.0755 0.056 Uiso 0.52(3) 1 calc PR A 2
C1_11 C 0.504(4) 0.343(3) 0.180(3) 0.104(16) Uiso 0.52(3) 1 d P A 2
H1D_11 H 0.5292 0.3074 0.1530 0.125 Uiso 0.52(3) 1 calc PR A 2
H1E_11 H 0.4310 0.3381 0.1906 0.125 Uiso 0.52(3) 1 calc PR A 2
H1F_11 H 0.5405 0.3475 0.2300 0.125 Uiso 0.52(3) 1 calc PR A 2
C2_11 C 0.433(3) 0.4404(18) 0.143(2) 0.073(11) Uiso 0.52(3) 1 d P A 2
H2D_11 H 0.4611 0.4766 0.1650 0.088 Uiso 0.52(3) 1 calc PR A 2
H2E_11 H 0.3813 0.4245 0.1789 0.088 Uiso 0.52(3) 1 calc PR A 2
H2F_11 H 0.4008 0.4491 0.0918 0.088 Uiso 0.52(3) 1 calc PR A 2
O_12 O 0.7999(8) 0.3527(4) 0.1647(4) 0.040(2) Uani 1 1 d . A .
C_12 C 0.7777(13) 0.3126(6) 0.2279(8) 0.048(4) Uani 1 1 d . . .
H0_12 H 0.7164 0.3274 0.2567 0.058 Uiso 1 1 calc R A .
C1_12 C 0.8661(11) 0.3119(6) 0.2843(7) 0.037(3) Uani 1 1 d . A .
H1A_12 H 0.8475 0.2898 0.3317 0.045 Uiso 1 1 calc R . .
H1B_12 H 0.8836 0.3524 0.2990 0.045 Uiso 1 1 calc R . .
H1C_12 H 0.9248 0.2933 0.2590 0.045 Uiso 1 1 calc R . .
C2_12 C 0.7533(16) 0.2539(7) 0.1947(10) 0.065(5) Uani 1 1 d . A .
H2A_12 H 0.6946 0.2572 0.1594 0.078 Uiso 1 1 calc R . .
H2B_12 H 0.7372 0.2266 0.2377 0.078 Uiso 1 1 calc R . .
H2C_12 H 0.8120 0.2390 0.1652 0.078 Uiso 1 1 calc R . .
Eu_20 Eu 0.59813(4) 0.17824(2) 0.53780(3) 0.01960(12) Uani 1 1 d . B .
Al1_20 Al 0.7462(3) 0.06657(16) 0.50608(18) 0.0237(8) Uani 1 1 d . B .
Al2_20 Al 0.3720(3) 0.18807(15) 0.45930(19) 0.0240(7) Uani 1 1 d . B .
Al3_20 Al 0.6966(3) 0.29088(16) 0.62805(17) 0.0266(8) Uani 1 1 d . B .
O_21 O 0.6290(8) 0.0777(4) 0.5569(4) 0.0245(19) Uani 1 1 d . . .
C_21 C 0.5699(17) 0.0289(10) 0.5841(12) 0.012(6) Uiso 0.51(3) 1 d P B 1
H0_21 H 0.6154 -0.0062 0.5810 0.014 Uiso 0.51(3) 1 calc PR B 1
C1_21 C 0.4829(18) 0.0178(13) 0.5246(15) 0.032(7) Uiso 0.51(3) 1 d P B 1
H1A_21 H 0.4318 0.0490 0.5294 0.038 Uiso 0.51(3) 1 calc PR B 1
H1B_21 H 0.4512 -0.0203 0.5357 0.038 Uiso 0.51(3) 1 calc PR B 1
H1C_21 H 0.5104 0.0177 0.4709 0.038 Uiso 0.51(3) 1 calc PR B 1
C2_21 C 0.555(3) 0.0432(17) 0.6786(18) 0.054(10) Uiso 0.51(3) 1 d P B 1
H2A_21 H 0.6221 0.0480 0.7033 0.065 Uiso 0.51(3) 1 calc PR B 1
H2B_21 H 0.5189 0.0106 0.7038 0.065 Uiso 0.51(3) 1 calc PR B 1
H2C_21 H 0.5159 0.0795 0.6848 0.065 Uiso 0.51(3) 1 calc PR B 1
C_21 C 0.550(5) 0.042(3) 0.602(4) 0.10(2) Uiso 0.49(3) 1 d P B 2
H0A_21 H 0.5290 0.0670 0.6479 0.124 Uiso 0.49(3) 1 calc PR B 2
C1_21 C 0.464(3) 0.0249(19) 0.566(2) 0.059(11) Uiso 0.49(3) 1 d P B 2
H1D_21 H 0.4642 -0.0179 0.5596 0.071 Uiso 0.49(3) 1 calc PR B 2
H1E_21 H 0.4590 0.0438 0.5145 0.071 Uiso 0.49(3) 1 calc PR B 2
H1F_21 H 0.4051 0.0364 0.5985 0.071 Uiso 0.49(3) 1 calc PR B 2
C2_21 C 0.601(4) -0.009(2) 0.636(3) 0.097(16) Uiso 0.49(3) 1 d P B 2
H2D_21 H 0.5499 -0.0352 0.6591 0.116 Uiso 0.49(3) 1 calc PR B 2
H2E_21 H 0.6489 0.0037 0.6762 0.116 Uiso 0.49(3) 1 calc PR B 2
H2F_21 H 0.6375 -0.0300 0.5939 0.116 Uiso 0.49(3) 1 calc PR B 2
O_22 O 0.7417(6) 0.1427(3) 0.4769(4) 0.0237(18) Uani 1 1 d . . .
C_22 C 0.8127(9) 0.1770(7) 0.4301(6) 0.030(3) Uani 1 1 d . B .
H0_22 H 0.7766 0.2129 0.4106 0.036 Uiso 1 1 calc R . .
C1_22 C 0.9001(11) 0.1967(6) 0.4829(9) 0.051(4) Uani 1 1 d . . .
H1A_22 H 0.8781 0.2302 0.5150 0.062 Uiso 1 1 calc R B .
H1B_22 H 0.9581 0.2083 0.4503 0.062 Uiso 1 1 calc R . .
H1C_22 H 0.9201 0.1641 0.5175 0.062 Uiso 1 1 calc R . .
C2_22 C 0.8472(13) 0.1416(6) 0.3593(8) 0.048(4) Uani 1 1 d . . .
H2A_22 H 0.9191 0.1311 0.3654 0.058 Uiso 1 1 calc R B .
H2B_22 H 0.8384 0.1650 0.3114 0.058 Uiso 1 1 calc R . .
H2C_22 H 0.8065 0.1056 0.3555 0.058 Uiso 1 1 calc R . .
O_23 O 0.4981(5) 0.1826(4) 0.4241(4) 0.0199(16) Uani 1 1 d . . .
C_23 C 0.5312(10) 0.1715(7) 0.3439(5) 0.034(3) Uani 1 1 d . B .
H0_23 H 0.6018 0.1873 0.3384 0.041 Uiso 1 1 calc R . .
C1_23 C 0.4667(14) 0.2025(7) 0.2876(7) 0.048(4) Uani 1 1 d . . .
H1A_23 H 0.4047 0.1796 0.2783 0.058 Uiso 1 1 calc R B .
H1B_23 H 0.5035 0.2075 0.2379 0.058 Uiso 1 1 calc R . .
H1C_23 H 0.4485 0.2411 0.3089 0.058 Uiso 1 1 calc R . .
C2_23 C 0.5351(12) 0.1051(7) 0.3279(7) 0.043(4) Uani 1 1 d . . .
H2A_23 H 0.5937 0.0880 0.3553 0.052 Uiso 1 1 calc R B .
H2B_23 H 0.5417 0.0982 0.2712 0.052 Uiso 1 1 calc R . .
H2C_23 H 0.4724 0.0866 0.3472 0.052 Uiso 1 1 calc R . .
O_24 O 0.4255(6) 0.1869(4) 0.5579(4) 0.025(2) Uani 1 1 d . . .
C_24 C 0.3723(11) 0.2020(6) 0.6316(6) 0.031(3) Uani 1 1 d . B .
H0_24 H 0.4099 0.1844 0.6771 0.038 Uiso 1 1 calc R . .
C1_24 C 0.2669(10) 0.1764(8) 0.6283(6) 0.046(3) Uani 1 1 d . . .
H1A_24 H 0.2243 0.2003 0.5935 0.055 Uiso 1 1 calc R B .
H1B_24 H 0.2374 0.1760 0.6814 0.055 Uiso 1 1 calc R . .
H1C_24 H 0.2703 0.1361 0.6080 0.055 Uiso 1 1 calc R . .
C2_24 C 0.3702(11) 0.2673(5) 0.6406(7) 0.034(3) Uani 1 1 d . . .
H2A_24 H 0.4349 0.2807 0.6629 0.041 Uiso 1 1 calc R B .
H2B_24 H 0.3144 0.2784 0.6759 0.041 Uiso 1 1 calc R . .
H2C_24 H 0.3599 0.2856 0.5889 0.041 Uiso 1 1 calc R . .
O_25 O 0.6524(6) 0.2755(4) 0.5295(4) 0.0236(18) Uani 1 1 d . . .
C_25 C 0.6372(12) 0.3167(5) 0.4650(8) 0.038(3) Uani 1 1 d . B .
H0_25 H 0.6390 0.2939 0.4146 0.046 Uiso 1 1 calc R . .
C1_25 C 0.5349(11) 0.3455(6) 0.4713(10) 0.048(3) Uani 1 1 d . . .
H1A_25 H 0.4828 0.3154 0.4808 0.058 Uiso 1 1 calc R B .
H1B_25 H 0.5196 0.3662 0.4221 0.058 Uiso 1 1 calc R . .
H1C_25 H 0.5353 0.3736 0.5151 0.058 Uiso 1 1 calc R . .
C2_25 C 0.7233(10) 0.3610(5) 0.4630(9) 0.040(3) Uani 1 1 d . . .
H2A_25 H 0.7095 0.3925 0.5009 0.049 Uiso 1 1 calc R B .
H2B_25 H 0.7287 0.3777 0.4099 0.049 Uiso 1 1 calc R . .
H2C_25 H 0.7873 0.3415 0.4768 0.049 Uiso 1 1 calc R . .
O_26 O 0.6589(6) 0.2173(4) 0.6564(4) 0.0252(18) Uani 1 1 d . . .
C_26 C 0.6799(12) 0.1898(7) 0.7310(6) 0.043(4) Uani 1 1 d . B .
H0_26 H 0.6256 0.1599 0.7409 0.052 Uiso 1 1 calc R . .
C1_26 C 0.6792(15) 0.2306(8) 0.7957(7) 0.059(5) Uani 1 1 d . . .
H1A_26 H 0.7445 0.2513 0.7978 0.071 Uiso 1 1 calc R B .
H1B_26 H 0.6684 0.2092 0.8451 0.071 Uiso 1 1 calc R . .
H1C_26 H 0.6241 0.2591 0.7882 0.071 Uiso 1 1 calc R . .
C2_26 C 0.7810(14) 0.1574(7) 0.7247(8) 0.052(4) Uani 1 1 d . . .
H2A_26 H 0.8298 0.1817 0.6958 0.062 Uiso 1 1 calc R B .
H2B_26 H 0.7709 0.1202 0.6967 0.062 Uiso 1 1 calc R . .
H2C_26 H 0.8073 0.1494 0.7777 0.062 Uiso 1 1 calc R . .
O_27 O 0.7278(7) 0.0225(4) 0.4270(4) 0.031(2) Uani 1 1 d . . .
CA_27 C 0.7687(13) -0.0296(5) 0.3971(6) 0.043(4) Uani 0.60(4) 1 d P B 1
HA_27 H 0.8394 -0.0349 0.4176 0.051 Uiso 0.60(4) 1 calc PR B 1
C1_27 C 0.709(3) -0.0819(17) 0.414(2) 0.086(12) Uiso 0.60(4) 1 d P B 1
H1A_27 H 0.7280 -0.0972 0.4662 0.103 Uiso 0.60(4) 1 calc PR B 1
H1B_27 H 0.7222 -0.1119 0.3740 0.103 Uiso 0.60(4) 1 calc PR B 1
H1C_27 H 0.6365 -0.0718 0.4141 0.103 Uiso 0.60(4) 1 calc PR B 1
C2_27 C 0.772(3) -0.0242(14) 0.3081(16) 0.066(9) Uiso 0.60(4) 1 d P B 1
H2A_27 H 0.7022 -0.0205 0.2878 0.079 Uiso 0.60(4) 1 calc PR B 1
H2B_27 H 0.8036 -0.0593 0.2856 0.079 Uiso 0.60(4) 1 calc PR B 1
H2C_27 H 0.8111 0.0107 0.2934 0.079 Uiso 0.60(4) 1 calc PR B 1
CB_27 C 0.7687(13) -0.0296(5) 0.3971(6) 0.043(4) Uani 0.40(4) 1 d P B 2
HB_27 H 0.7990 -0.0531 0.4409 0.051 Uiso 0.40(4) 1 calc PR B 2
C1_27 C 0.663(4) -0.062(2) 0.365(3) 0.075(16) Uiso 0.40(4) 1 d P B 2
H1D_27 H 0.6334 -0.0394 0.3218 0.090 Uiso 0.40(4) 1 calc PR B 2
H1E_27 H 0.6137 -0.0652 0.4082 0.090 Uiso 0.40(4) 1 calc PR B 2
H1F_27 H 0.6793 -0.1020 0.3460 0.090 Uiso 0.40(4) 1 calc PR B 2
C2_27 C 0.833(3) -0.0290(17) 0.3349(19) 0.047(11) Uiso 0.40(4) 1 d P B 2
H2D_27 H 0.8178 0.0049 0.3013 0.056 Uiso 0.40(4) 1 calc PR B 2
H2E_27 H 0.8250 -0.0653 0.3045 0.056 Uiso 0.40(4) 1 calc PR B 2
H2F_27 H 0.9034 -0.0261 0.3540 0.056 Uiso 0.40(4) 1 calc PR B 2
O_28 O 0.8390(8) 0.0481(4) 0.5722(4) 0.040(2) Uani 1 1 d . . .
C_28 C 0.9436(12) 0.0328(6) 0.5698(8) 0.042(4) Uani 1 1 d . B .
H0_28 H 0.9704 0.0420 0.5161 0.050 Uiso 1 1 calc R . .
C1_28 C 0.9554(16) -0.0325(7) 0.5839(9) 0.054(4) Uani 1 1 d . . .
H1A_28 H 0.9364 -0.0417 0.6384 0.065 Uiso 1 1 calc R B .
H1B_28 H 1.0264 -0.0439 0.5749 0.065 Uiso 1 1 calc R . .
H1C_28 H 0.9112 -0.0542 0.5476 0.065 Uiso 1 1 calc R . .
C2_28 C 1.0024(12) 0.0681(8) 0.6288(8) 0.051(4) Uani 1 1 d . . .
H2A_28 H 0.9630 0.1029 0.6437 0.062 Uiso 1 1 calc R B .
H2B_28 H 1.0673 0.0804 0.6056 0.062 Uiso 1 1 calc R . .
H2C_28 H 1.0154 0.0441 0.6757 0.062 Uiso 1 1 calc R . .
O_29 O 0.3173(6) 0.2549(4) 0.4461(4) 0.033(2) Uani 1 1 d . . .
C_29 C 0.2419(14) 0.2781(8) 0.3911(11) 0.058(4) Uani 1 1 d . B .
H0_29 H 0.2353 0.2507 0.3453 0.069 Uiso 1 1 calc R . .
C1_29 C 0.2799(12) 0.3369(8) 0.3625(9) 0.055(4) Uani 1 1 d . . .
H1A_29 H 0.2471 0.3465 0.3123 0.066 Uiso 1 1 calc R B .
H1B_29 H 0.3538 0.3351 0.3551 0.066 Uiso 1 1 calc R . .
H1C_29 H 0.2635 0.3672 0.4015 0.066 Uiso 1 1 calc R . .
C2_29 C 0.1439(11) 0.2830(10) 0.4307(12) 0.083(7) Uani 1 1 d . . .
H2A_29 H 0.1428 0.2570 0.4767 0.100 Uiso 1 1 calc R B .
H2B_29 H 0.0895 0.2717 0.3942 0.100 Uiso 1 1 calc R . .
H2C_29 H 0.1334 0.3237 0.4478 0.100 Uiso 1 1 calc R . .
O_210 O 0.3077(7) 0.1259(4) 0.4310(5) 0.037(2) Uani 1 1 d . . .
C_210 C 0.2043(11) 0.1045(6) 0.4339(7) 0.037(3) Uani 1 1 d . B .
H0_210 H 0.1634 0.1307 0.4690 0.045 Uiso 1 1 calc R . .
C1_210 C 0.2094(11) 0.0443(7) 0.4698(10) 0.052(4) Uani 1 1 d . . .
H1A_210 H 0.2482 0.0181 0.4352 0.062 Uiso 1 1 calc R B .
H1B_210 H 0.1403 0.0288 0.4765 0.062 Uiso 1 1 calc R . .
H1C_210 H 0.2429 0.0466 0.5213 0.062 Uiso 1 1 calc R . .
C2_210 C 0.1598(13) 0.1062(8) 0.3523(9) 0.058(5) Uani 1 1 d . . .
H2A_210 H 0.1443 0.1470 0.3380 0.070 Uiso 1 1 calc R B .
H2B_210 H 0.0972 0.0828 0.3510 0.070 Uiso 1 1 calc R . .
H2C_210 H 0.2089 0.0899 0.3147 0.070 Uiso 1 1 calc R . .
O_211 O 0.6224(8) 0.3450(4) 0.6690(4) 0.042(2) Uani 1 1 d . . .
C_211 C 0.6356(12) 0.3866(6) 0.7296(7) 0.038(3) Uani 1 1 d . B .
H0_211 H 0.6926 0.3729 0.7641 0.046 Uiso 1 1 calc R . .
C1_211 C 0.6661(17) 0.4456(7) 0.6935(9) 0.065(5) Uani 1 1 d . . .
H1A_211 H 0.7263 0.4402 0.6601 0.078 Uiso 1 1 calc R B .
H1B_211 H 0.6819 0.4736 0.7356 0.078 Uiso 1 1 calc R . .
H1C_211 H 0.6099 0.4608 0.6615 0.078 Uiso 1 1 calc R . .
C2_211 C 0.5431(16) 0.3904(9) 0.7781(10) 0.072(6) Uani 1 1 d . . .
H2A_211 H 0.4957 0.4186 0.7543 0.086 Uiso 1 1 calc R B .
H2B_211 H 0.5612 0.4036 0.8312 0.086 Uiso 1 1 calc R . .
H2C_211 H 0.5108 0.3516 0.7810 0.086 Uiso 1 1 calc R . .
O_212 O 0.8221(8) 0.2966(4) 0.6361(5) 0.040(2) Uani 1 1 d . . .
CA_212 C 0.9025(11) 0.3350(8) 0.6638(8) 0.053(4) Uani 0.71(4) 1 d P B 1
HA_212 H 0.8715 0.3594 0.7066 0.063 Uiso 0.71(4) 1 calc PR B 1
C1_212 C 0.938(2) 0.3769(13) 0.6042(14) 0.065(8) Uiso 0.71(4) 1 d P B 1
H1A_212 H 0.9448 0.3567 0.5535 0.077 Uiso 0.71(4) 1 calc PR B 1
H1B_212 H 1.0035 0.3931 0.6202 0.077 Uiso 0.71(4) 1 calc PR B 1
H1C_212 H 0.8880 0.4088 0.5991 0.077 Uiso 0.71(4) 1 calc PR B 1
C2_212 C 0.987(3) 0.2993(17) 0.703(2) 0.095(11) Uiso 0.71(4) 1 d P B 1
H2A_212 H 0.9665 0.2899 0.7575 0.114 Uiso 0.71(4) 1 calc PR B 1
H2B_212 H 1.0497 0.3222 0.7040 0.114 Uiso 0.71(4) 1 calc PR B 1
H2C_212 H 0.9975 0.2627 0.6739 0.114 Uiso 0.71(4) 1 calc PR B 1
CB_212 C 0.9025(11) 0.3350(8) 0.6638(8) 0.053(4) Uani 0.29(4) 1 d P B 2
HB_212 H 0.8732 0.3756 0.6661 0.063 Uiso 0.29(4) 1 calc PR B 2
C1_212 C 0.984(5) 0.336(3) 0.597(3) 0.059(19) Uiso 0.29(4) 1 d P B 2
H1D_212 H 1.0290 0.3016 0.6036 0.071 Uiso 0.29(4) 1 calc PR B 2
H1E_212 H 1.0239 0.3719 0.6008 0.071 Uiso 0.29(4) 1 calc PR B 2
H1F_212 H 0.9502 0.3337 0.5460 0.071 Uiso 0.29(4) 1 calc PR B 2
C2_212 C 0.958(5) 0.326(3) 0.739(3) 0.054(17) Uiso 0.29(4) 1 d P B 2
H2D_212 H 0.9107 0.3292 0.7831 0.065 Uiso 0.29(4) 1 calc PR B 2
H2E_212 H 1.0116 0.3556 0.7440 0.065 Uiso 0.29(4) 1 calc PR B 2
H2F_212 H 0.9890 0.2866 0.7389 0.065 Uiso 0.29(4) 1 calc PR B 2

loop_
 _atom_site_aniso_label
 _atom_site_aniso_U_11
 _atom_site_aniso_U_22
 _atom_site_aniso_U_33
 _atom_site_aniso_U_23
 _atom_site_aniso_U_13
 _atom_site_aniso_U_12
Eu 0.0183(2) 0.0209(3) 0.0211(2) 0.0029(3) 0.0017(2) -0.0022(2)
Al1 0.0284(19) 0.0123(19) 0.0378(19) 0.0008(13) 0.0126(14) -0.0025(15)
Al2 0.019(2) 0.030(2) 0.0389(18) -0.0056(15) 0.0089(16) 0.0000(17)
Al3 0.0258(19) 0.0174(19) 0.0245(15) 0.0043(12) 0.0000(13) -0.0065(15)
O_1 0.034(5) 0.030(6) 0.033(5) -0.016(4) 0.010(4) -0.017(4)
O_2 0.027(4) 0.018(4) 0.022(3) 0.004(3) -0.001(4) 0.004(3)
C_2 0.016(6) 0.035(8) 0.027(6) 0.000(5) -0.015(5) 0.008(5)
C1_2 0.026(6) 0.034(8) 0.036(5) -0.001(5) -0.012(6) -0.003(5)
C2_2 0.022(7) 0.050(9) 0.040(6) -0.004(6) 0.000(5) 0.001(6)
O_3 0.011(4) 0.039(6) 0.024(4) 0.001(3) 0.011(3) -0.004(3)
C_3 0.027(7) 0.038(8) 0.028(6) 0.001(6) 0.012(5) 0.011(7)
C1_3 0.049(9) 0.048(9) 0.019(5) 0.006(5) 0.001(5) -0.006(7)
C2_3 0.057(10) 0.042(10) 0.045(8) 0.010(6) 0.013(6) -0.005(8)
O_4 0.023(5) 0.034(6) 0.026(4) -0.002(3) 0.001(3) 0.007(4)
C_4 0.024(7) 0.084(12) 0.019(5) 0.001(6) -0.015(5) 0.002(7)
C1_4 0.046(9) 0.038(9) 0.059(8) 0.020(6) 0.000(7) 0.023(7)
C2_4 0.042(9) 0.111(17) 0.038(7) -0.002(8) -0.010(6) 0.001(9)
O_5 0.040(5) 0.014(4) 0.020(4) 0.001(3) 0.000(3) -0.004(3)
C_5 0.060(9) 0.038(8) 0.020(5) -0.020(6) 0.007(7) -0.011(6)
C1_5 0.099(14) 0.023(8) 0.060(9) -0.004(7) 0.025(12) 0.013(8)
C2_5 0.078(11) 0.059(10) 0.043(6) -0.033(8) 0.026(9) -0.059(9)
O_6 0.028(4) 0.020(4) 0.013(3) 0.002(3) 0.006(3) -0.005(3)
C_6 0.037(7) 0.021(7) 0.024(5) -0.008(5) 0.008(4) -0.008(6)
C1_6 0.060(10) 0.031(8) 0.042(7) -0.011(5) 0.014(7) 0.018(7)
C2_6 0.042(8) 0.050(9) 0.030(6) -0.001(5) 0.002(6) 0.011(7)
O_7 0.057(6) 0.027(5) 0.049(4) 0.021(5) 0.018(4) -0.006(6)
C_7 0.033(8) 0.039(9) 0.066(8) 0.017(7) 0.011(6) 0.004(6)
C1_7 0.083(14) 0.045(10) 0.091(11) 0.041(8) 0.057(11) 0.024(9)
C2_7 0.063(11) 0.089(14) 0.046(8) 0.025(8) 0.020(8) 0.020(10)
O_8 0.037(5) 0.041(6) 0.047(5) -0.004(4) 0.009(5) 0.011(4)
C_8 0.060(10) 0.029(7) 0.034(6) 0.005(5) 0.021(6) 0.015(7)
C1_8 0.119(18) 0.079(13) 0.041(7) -0.012(7) 0.031(10) 0.040(13)
C2_8 0.060(11) 0.055(11) 0.080(12) 0.022(8) 0.020(9) 0.020(8)
O_9 0.053(6) 0.043(6) 0.041(5) -0.005(4) 0.015(4) 0.018(5)
O_10 0.030(5) 0.031(6) 0.086(7) -0.013(5) 0.020(5) -0.011(4)
O_11 0.042(6) 0.029(5) 0.050(4) 0.006(3) 0.012(5) -0.012(5)
O_12 0.060(7) 0.028(5) 0.032(4) 0.022(4) 0.010(4) 0.011(5)
C_12 0.054(10) 0.035(9) 0.056(8) 0.022(6) 0.020(7) 0.016(7)
C1_12 0.030(8) 0.049(9) 0.033(6) 0.015(5) 0.005(5) 0.005(7)
C2_12 0.079(13) 0.034(10) 0.083(11) 0.024(7) -0.003(10) -0.017(9)
Eu_20 0.0221(3) 0.0168(3) 0.0199(2) -0.0007(3) 0.0005(3) 0.0004(2)
Al1_20 0.0309(19) 0.016(2) 0.0243(15) 0.0021(12) 0.0006(13) 0.0004(15)
Al2_20 0.0198(17) 0.029(2) 0.0230(14) 0.0021(15) 0.0005(17) -0.0004(14)
Al3_20 0.037(2) 0.022(2) 0.0202(15) -0.0013(13) -0.0014(14) -0.0026(16)
O_21 0.039(5) 0.011(5) 0.023(4) 0.000(3) 0.014(3) -0.006(4)
O_22 0.033(4) 0.015(4) 0.023(4) 0.001(3) 0.001(3) -0.010(3)
C_22 0.031(7) 0.032(7) 0.026(5) 0.009(6) 0.012(4) 0.005(7)
C1_22 0.023(7) 0.043(10) 0.088(11) 0.018(7) 0.001(7) -0.022(6)
C2_22 0.056(10) 0.027(8) 0.062(8) 0.018(6) 0.038(7) 0.015(7)
O_23 0.015(4) 0.031(5) 0.014(3) 0.005(4) -0.004(3) -0.007(4)
C_23 0.042(8) 0.052(10) 0.009(4) -0.003(5) 0.006(5) 0.002(7)
C1_23 0.063(11) 0.050(10) 0.031(6) 0.001(6) -0.003(7) 0.011(8)
C2_23 0.053(9) 0.050(10) 0.027(6) -0.013(6) -0.013(6) 0.023(7)
O_24 0.027(5) 0.029(5) 0.018(3) 0.000(3) 0.006(3) 0.006(4)
C_24 0.034(8) 0.039(8) 0.021(5) -0.002(4) 0.009(5) 0.000(6)
C1_24 0.035(7) 0.063(9) 0.039(6) -0.013(7) 0.022(5) -0.022(9)
C2_24 0.047(9) 0.023(7) 0.033(6) -0.008(5) 0.014(6) 0.009(6)
O_25 0.034(5) 0.022(4) 0.015(3) 0.005(3) 0.004(3) -0.002(3)
C_25 0.086(10) 0.008(6) 0.020(5) 0.009(5) -0.008(8) 0.005(6)
C1_25 0.055(9) 0.023(7) 0.066(9) 0.018(7) -0.001(8) -0.002(7)
C2_25 0.051(8) 0.030(8) 0.040(6) 0.005(6) -0.007(8) 0.004(6)
O_26 0.038(5) 0.021(5) 0.017(3) 0.002(3) -0.007(3) 0.003(4)
C_26 0.053(9) 0.063(11) 0.014(5) 0.008(5) -0.006(5) 0.005(8)
C1_26 0.079(13) 0.062(11) 0.035(7) 0.010(7) -0.017(7) -0.028(9)
C2_26 0.066(11) 0.050(11) 0.040(7) 0.013(6) -0.018(7) 0.011(8)
O_27 0.048(5) 0.015(5) 0.028(4) -0.005(3) -0.005(3) 0.001(4)
CA_27 0.081(11) 0.019(7) 0.029(6) -0.001(5) -0.020(6) 0.013(7)
CB_27 0.081(11) 0.019(7) 0.029(6) -0.001(5) -0.020(6) 0.013(7)
O_28 0.049(6) 0.045(6) 0.027(4) 0.004(4) -0.008(4) 0.017(5)
C_28 0.046(9) 0.035(8) 0.044(7) 0.007(5) -0.013(6) 0.001(6)
C1_28 0.066(12) 0.046(10) 0.050(8) 0.011(7) -0.009(8) -0.002(8)
C2_28 0.039(9) 0.068(11) 0.047(8) 0.009(7) -0.029(6) -0.002(8)
O_29 0.015(4) 0.053(6) 0.032(5) 0.009(4) -0.001(3) 0.014(4)
C_29 0.056(11) 0.046(10) 0.071(10) 0.009(8) -0.015(8) 0.013(8)
C1_29 0.040(9) 0.061(11) 0.065(9) 0.032(8) 0.006(7) 0.016(8)
C2_29 0.015(8) 0.106(17) 0.130(16) 0.065(13) -0.008(9) 0.007(8)
O_210 0.028(5) 0.040(6) 0.042(4) -0.008(4) 0.006(4) -0.015(4)
C_210 0.045(8) 0.039(8) 0.028(6) -0.006(5) 0.001(5) -0.012(6)
C1_210 0.039(8) 0.054(9) 0.064(8) -0.007(8) 0.015(8) -0.021(7)
C2_210 0.035(9) 0.076(13) 0.063(9) 0.000(8) -0.009(7) -0.030(8)
O_211 0.059(6) 0.033(5) 0.033(4) -0.012(3) -0.001(4) 0.008(5)
C_211 0.047(9) 0.027(7) 0.041(6) -0.010(5) 0.006(6) 0.001(6)
C1_211 0.107(15) 0.033(9) 0.054(8) -0.021(6) 0.009(9) -0.003(9)
C2_211 0.087(15) 0.057(12) 0.071(10) -0.023(8) 0.048(10) -0.008(10)
O_212 0.041(6) 0.028(6) 0.050(5) -0.010(4) 0.003(4) -0.004(5)
CA_212 0.029(8) 0.065(11) 0.064(8) -0.002(7) -0.013(7) -0.015(8)
CB_212 0.029(8) 0.065(11) 0.064(8) -0.002(7) -0.013(7) -0.015(8)

_geom_special_details
;
 All esds (except the esd in the dihedral angle between two l.s. planes)
 are estimated using the full covariance matrix.  The cell esds are taken
 into account individually in the estimation of esds in distances, angles
 and torsion angles; correlations between esds in cell parameters are only
 used when they are defined by crystal symmetry.  An approximate (isotropic)
 treatment of cell esds is used for estimating esds involving l.s. planes.
;

loop_
 _geom_bond_atom_site_label_1
 _geom_bond_atom_site_label_2
 _geom_bond_distance
 _geom_bond_site_symmetry_2
 _geom_bond_publ_flag
Eu O_5 2.305(8) . ?
Eu O_3 2.307(7) . ?
Eu O_1 2.315(9) . ?
Eu O_6 2.318(7) . ?
Eu O_2 2.335(7) . ?
Eu O_4 2.342(9) . ?
Eu C_1 3.26(5) . ?
Al1 O_7 1.684(8) . ?
Al1 O_8 1.691(9) . ?
Al1 O_2 1.787(8) . ?
Al1 O_1 1.823(11) . ?
Al2 O_9 1.693(10) . ?
Al2 O_10 1.708(10) . ?
Al2 O_4 1.783(8) . ?
Al2 O_3 1.833(9) . ?
Al3 O_11 1.700(11) . ?
Al3 O_12 1.712(9) . ?
Al3 O_6 1.801(8) . ?
Al3 O_5 1.803(8) . ?
O_1 C_1 1.443(15) . ?
O_1 C_1 1.46(2) . ?
C_1 C2_1 1.37(7) . ?
C_1 C1_1 1.51(2) . ?
C_1 C1_1 1.517(17) . ?
C_1 C2_1 1.57(3) . ?
O_2 C_2 1.470(13) . ?
C_2 C2_2 1.491(17) . ?
C_2 C1_2 1.514(17) . ?
O_3 C_3 1.412(13) . ?
C_3 C1_3 1.506(19) . ?
C_3 C2_3 1.52(2) . ?
O_4 C_4 1.455(14) . ?
C_4 C1_4 1.50(2) . ?
C_4 C2_4 1.50(2) . ?
O_5 C_5 1.474(14) . ?
C_5 C2_5 1.474(17) . ?
C_5 C1_5 1.49(2) . ?
O_6 C_6 1.434(13) . ?
C_6 C1_6 1.51(2) . ?
C_6 C2_6 1.519(17) . ?
O_7 C_7 1.421(16) . ?
C_7 C2_7 1.49(2) . ?
C_7 C1_7 1.52(2) . ?
O_8 C_8 1.400(15) . ?
C_8 C2_8 1.50(2) . ?
C_8 C1_8 1.519(16) . ?
O_9 C_9 1.41(3) . ?
O_9 C_9 1.43(4) . ?
C_9 C2_9 1.50(2) . ?
C_9 C1_9 1.63(5) . ?
C_9 C1_9 1.46(4) . ?
C_9 C2_9 1.521(19) . ?
O_10 C_10 1.39(4) . ?
O_10 C_10 1.42(3) . ?
C_10 C2_10 1.55(3) . ?
C_10 C1_10 1.57(4) . ?
C_10 C2_10 1.42(6) . ?
C_10 C1_10 1.50(8) . ?
O_11 C_11 1.33(4) . ?
O_11 C_11 1.48(4) . ?
C_11 C1_11 1.51(4) . ?
C_11 C2_11 1.56(5) . ?
C_11 C1_11 1.45(6) . ?
C_11 C2_11 1.58(6) . ?
O_12 C_12 1.438(15) . ?
C_12 C2_12 1.48(2) . ?
C_12 C1_12 1.51(2) . ?
Eu_20 O_22 2.298(8) . ?
Eu_20 O_24 2.303(8) . ?
Eu_20 O_25 2.329(8) . ?
Eu_20 O_23 2.338(6) . ?
Eu_20 O_26 2.340(7) . ?
Eu_20 O_21 2.344(9) . ?
Al1_20 O_27 1.692(8) . ?
Al1_20 O_28 1.709(9) . ?
Al1_20 O_21 1.784(9) . ?
Al1_20 O_22 1.802(8) . ?
Al2_20 O_29 1.695(10) . ?
Al2_20 O_210 1.715(9) . ?
Al2_20 O_23 1.767(7) . ?
Al2_20 O_24 1.816(7) . ?
Al3_20 O_212 1.660(11) . ?
Al3_20 O_211 1.717(10) . ?
Al3_20 O_25 1.805(8) . ?
Al3_20 O_26 1.811(9) . ?
O_21 C_21 1.43(2) . ?
O_21 C_21 1.52(7) . ?
C_21 C1_21 1.55(3) . ?
C_21 C2_21 1.65(4) . ?
C_21 C1_21 1.35(7) . ?
C_21 C2_21 1.45(7) . ?
O_22 C_22 1.453(14) . ?
C_22 C2_22 1.516(17) . ?
C_22 C1_22 1.524(18) . ?
O_23 C_23 1.450(12) . ?
C_23 C1_23 1.458(19) . ?
C_23 C2_23 1.54(2) . ?
O_24 C_24 1.474(13) . ?
C_24 C2_24 1.492(18) . ?
C_24 C1_24 1.505(18) . ?
O_25 C_25 1.452(14) . ?
C_25 C1_25 1.50(2) . ?
C_25 C2_25 1.516(19) . ?
O_26 C_26 1.439(13) . ?
C_26 C1_26 1.44(2) . ?
C_26 C2_26 1.52(2) . ?
O_27 CA_27 1.396(15) . ?
CA_27 C1_27 1.45(4) . ?
CA_27 C2_27 1.51(3) . ?
O_28 C_28 1.419(17) . ?
C_28 C2_28 1.50(2) . ?
C_28 C1_28 1.51(2) . ?
O_29 C_29 1.460(18) . ?
C_29 C2_29 1.46(3) . ?
C_29 C1_29 1.51(2) . ?
O_210 C_210 1.444(16) . ?
C_210 C1_210 1.50(2) . ?
C_210 C2_210 1.504(18) . ?
O_211 C_211 1.408(15) . ?
C_211 C2_211 1.47(2) . ?
C_211 C1_211 1.53(2) . ?
O_212 CA_212 1.451(17) . ?
CA_212 C1_212 1.46(3) . ?
CA_212 C2_212 1.53(4) . ?

loop_
 _geom_angle_atom_site_label_1
 _geom_angle_atom_site_label_2
 _geom_angle_atom_site_label_3
 _geom_angle
 _geom_angle_site_symmetry_1
 _geom_angle_site_symmetry_3
 _geom_angle_publ_flag
O_5 Eu O_3 101.3(3) . . ?
O_5 Eu O_1 148.2(3) . . ?
O_3 Eu O_1 105.0(3) . . ?
O_5 Eu O_6 65.1(3) . . ?
O_3 Eu O_6 152.2(3) . . ?
O_1 Eu O_6 96.9(3) . . ?
O_5 Eu O_2 93.1(3) . . ?
O_3 Eu O_2 98.8(3) . . ?
O_1 Eu O_2 65.6(3) . . ?
O_6 Eu O_2 105.8(3) . . ?
O_5 Eu O_4 105.5(3) . . ?
O_3 Eu O_4 66.4(3) . . ?
O_1 Eu O_4 101.2(3) . . ?
O_6 Eu O_4 93.0(3) . . ?
O_2 Eu O_4 157.9(3) . . ?
O_5 Eu C_1 157.8(6) . . ?
O_3 Eu C_1 100.2(6) . . ?
O_1 Eu C_1 23.3(11) . . ?
O_6 Eu C_1 93.1(6) . . ?
O_2 Eu C_1 88.8(11) . . ?
O_4 Eu C_1 78.5(11) . . ?
O_7 Al1 O_8 118.3(5) . . ?
O_7 Al1 O_2 116.2(5) . . ?
O_8 Al1 O_2 108.8(4) . . ?
O_7 Al1 O_1 106.7(5) . . ?
O_8 Al1 O_1 114.8(5) . . ?
O_2 Al1 O_1 88.5(4) . . ?
O_9 Al2 O_10 117.9(6) . . ?
O_9 Al2 O_4 110.9(4) . . ?
O_10 Al2 O_4 112.9(5) . . ?
O_9 Al2 O_3 115.3(5) . . ?
O_10 Al2 O_3 106.9(5) . . ?
O_4 Al2 O_3 89.5(4) . . ?
O_11 Al3 O_12 119.2(5) . . ?
O_11 Al3 O_6 107.6(4) . . ?
O_12 Al3 O_6 114.2(5) . . ?
O_11 Al3 O_5 116.8(4) . . ?
O_12 Al3 O_5 107.6(4) . . ?
O_6 Al3 O_5 87.3(3) . . ?
C_1 O_1 C_1 27(2) . . ?
C_1 O_1 Al1 112.3(13) . . ?
C_1 O_1 Al1 139(3) . . ?
C_1 O_1 Eu 142.5(12) . . ?
C_1 O_1 Eu 118(3) . . ?
Al1 O_1 Eu 102.7(4) . . ?
C2_1 C_1 O_1 112(4) . . ?
C2_1 C_1 C1_1 117(4) . . ?
O_1 C_1 C1_1 112(2) . . ?
C2_1 C_1 Eu 133(3) . . ?
O_1 C_1 Eu 39(2) . . ?
C1_1 C_1 Eu 110(3) . . ?
O_1 C_1 C1_1 111.2(17) . . ?
O_1 C_1 C2_1 104.8(17) . . ?
C1_1 C_1 C2_1 115(2) . . ?
C_2 O_2 Al1 127.1(6) . . ?
C_2 O_2 Eu 128.3(6) . . ?
Al1 O_2 Eu 103.1(4) . . ?
O_2 C_2 C2_2 109.1(10) . . ?
O_2 C_2 C1_2 108.9(8) . . ?
C2_2 C_2 C1_2 112.1(10) . . ?
C_3 O_3 Al2 118.4(7) . . ?
C_3 O_3 Eu 138.1(7) . . ?
Al2 O_3 Eu 101.8(3) . . ?
O_3 C_3 C1_3 110.5(11) . . ?
O_3 C_3 C2_3 110.5(11) . . ?
C1_3 C_3 C2_3 111.3(12) . . ?
C_4 O_4 Al2 129.4(8) . . ?
C_4 O_4 Eu 127.6(7) . . ?
Al2 O_4 Eu 102.1(4) . . ?
O_4 C_4 C1_4 110.1(11) . . ?
O_4 C_4 C2_4 109.3(12) . . ?
C1_4 C_4 C2_4 111.7(14) . . ?
C_5 O_5 Al3 123.7(7) . . ?
C_5 O_5 Eu 131.3(7) . . ?
Al3 O_5 Eu 104.0(3) . . ?
O_5 C_5 C2_5 111.1(10) . . ?
O_5 C_5 C1_5 108.9(12) . . ?
C2_5 C_5 C1_5 116.1(14) . . ?
C_6 O_6 Al3 125.7(7) . . ?
C_6 O_6 Eu 129.0(7) . . ?
Al3 O_6 Eu 103.6(3) . . ?
O_6 C_6 C1_6 109.5(9) . . ?
O_6 C_6 C2_6 111.4(11) . . ?
C1_6 C_6 C2_6 112.2(11) . . ?
C_7 O_7 Al1 143.5(9) . . ?
O_7 C_7 C2_7 113.4(12) . . ?
O_7 C_7 C1_7 106.9(12) . . ?
C2_7 C_7 C1_7 110.5(14) . . ?
C_8 O_8 Al1 132.7(8) . . ?
O_8 C_8 C2_8 111.6(12) . . ?
O_8 C_8 C1_8 108.5(11) . . ?
C2_8 C_8 C1_8 110.6(14) . . ?
C_9 O_9 C_9 31.1(15) . . ?
C_9 O_9 Al2 151.1(14) . . ?
C_9 O_9 Al2 120.6(18) . . ?
O_9 C_9 C2_9 103(3) . . ?
O_9 C_9 C1_9 105(2) . . ?
C2_9 C_9 C1_9 110(3) . . ?
O_9 C_9 C1_9 110(3) . . ?
O_9 C_9 C2_9 112(2) . . ?
C1_9 C_9 C2_9 115(2) . . ?
C_10 O_10 C_10 17(2) . . ?
C_10 O_10 Al2 143(2) . . ?
C_10 O_10 Al2 132.3(15) . . ?
O_10 C_10 C2_10 111.8(19) . . ?
O_10 C_10 C1_10 105(2) . . ?
C2_10 C_10 C1_10 114(2) . . ?
O_10 C_10 C2_10 107(3) . . ?
O_10 C_10 C1_10 118(4) . . ?
C2_10 C_10 C1_10 118(5) . . ?
C_11 O_11 C_11 16(2) . . ?
C_11 O_11 Al3 148(2) . . ?
C_11 O_11 Al3 133.2(18) . . ?
O_11 C_11 C1_11 104(2) . . ?
O_11 C_11 C2_11 108(3) . . ?
C1_11 C_11 C2_11 114(3) . . ?
O_11 C_11 C1_11 118(4) . . ?
O_11 C_11 C2_11 111(3) . . ?
C1_11 C_11 C2_11 111(4) . . ?
C_12 O_12 Al3 135.3(9) . . ?
O_12 C_12 C2_12 109.3(12) . . ?
O_12 C_12 C1_12 108.9(13) . . ?
C2_12 C_12 C1_12 113.5(13) . . ?
O_22 Eu_20 O_24 154.9(3) . . ?
O_22 Eu_20 O_25 93.1(3) . . ?
O_24 Eu_20 O_25 103.3(3) . . ?
O_22 Eu_20 O_23 96.1(3) . . ?
O_24 Eu_20 O_23 64.2(2) . . ?
O_25 Eu_20 O_23 94.7(3) . . ?
O_22 Eu_20 O_26 103.9(3) . . ?
O_24 Eu_20 O_26 100.2(3) . . ?
O_25 Eu_20 O_26 65.6(3) . . ?
O_23 Eu_20 O_26 152.4(3) . . ?
O_22 Eu_20 O_21 65.0(3) . . ?
O_24 Eu_20 O_21 103.5(3) . . ?
O_25 Eu_20 O_21 151.9(3) . . ?
O_23 Eu_20 O_21 104.6(3) . . ?
O_26 Eu_20 O_21 101.0(3) . . ?
O_27 Al1_20 O_28 118.5(5) . . ?
O_27 Al1_20 O_21 110.1(5) . . ?
O_28 Al1_20 O_21 109.5(4) . . ?
O_27 Al1_20 O_22 110.3(4) . . ?
O_28 Al1_20 O_22 116.0(5) . . ?
O_21 Al1_20 O_22 88.2(4) . . ?
O_29 Al2_20 O_210 119.5(5) . . ?
O_29 Al2_20 O_23 114.6(5) . . ?
O_210 Al2_20 O_23 108.0(5) . . ?
O_29 Al2_20 O_24 107.4(4) . . ?
O_210 Al2_20 O_24 115.9(4) . . ?
O_23 Al2_20 O_24 87.0(3) . . ?
O_212 Al3_20 O_211 118.4(5) . . ?
O_212 Al3_20 O_25 114.3(4) . . ?
O_211 Al3_20 O_25 109.3(4) . . ?
O_212 Al3_20 O_26 108.8(5) . . ?
O_211 Al3_20 O_26 113.5(5) . . ?
O_25 Al3_20 O_26 88.8(4) . . ?
C_21 O_21 C_21 19(3) . . ?
C_21 O_21 Al1_20 121.0(12) . . ?
C_21 O_21 Al1_20 139(3) . . ?
C_21 O_21 Eu_20 135.0(11) . . ?
C_21 O_21 Eu_20 118(3) . . ?
Al1_20 O_21 Eu_20 102.8(4) . . ?
O_21 C_21 C1_21 108.6(17) . . ?
O_21 C_21 C2_21 103.0(19) . . ?
C1_21 C_21 C2_21 126(2) . . ?
C1_21 C_21 C2_21 109(5) . . ?
C1_21 C_21 O_21 120(5) . . ?
C2_21 C_21 O_21 108(5) . . ?
C_22 O_22 Al1_20 130.1(8) . . ?
C_22 O_22 Eu_20 125.8(7) . . ?
Al1_20 O_22 Eu_20 103.9(3) . . ?
O_22 C_22 C2_22 109.9(12) . . ?
O_22 C_22 C1_22 108.6(8) . . ?
C2_22 C_22 C1_22 113.4(12) . . ?
C_23 O_23 Al2_20 127.7(7) . . ?
C_23 O_23 Eu_20 126.7(7) . . ?
Al2_20 O_23 Eu_20 104.6(3) . . ?
O_23 C_23 C1_23 110.9(11) . . ?
O_23 C_23 C2_23 110.2(11) . . ?
C1_23 C_23 C2_23 112.2(11) . . ?
C_24 O_24 Al2_20 126.5(7) . . ?
C_24 O_24 Eu_20 127.8(7) . . ?
Al2_20 O_24 Eu_20 104.3(3) . . ?
O_24 C_24 C2_24 109.1(9) . . ?
O_24 C_24 C1_24 108.4(9) . . ?
C2_24 C_24 C1_24 111.8(13) . . ?
C_25 O_25 Al3_20 128.1(8) . . ?
C_25 O_25 Eu_20 128.0(7) . . ?
Al3_20 O_25 Eu_20 103.0(3) . . ?
O_25 C_25 C1_25 110.5(12) . . ?
O_25 C_25 C2_25 110.1(11) . . ?
C1_25 C_25 C2_25 112.4(11) . . ?
C_26 O_26 Al3_20 125.6(8) . . ?
C_26 O_26 Eu_20 131.1(8) . . ?
Al3_20 O_26 Eu_20 102.4(3) . . ?
C1_26 C_26 O_26 112.9(13) . . ?
C1_26 C_26 C2_26 111.8(13) . . ?
O_26 C_26 C2_26 108.4(10) . . ?
CA_27 O_27 Al1_20 137.4(8) . . ?
O_27 CA_27 C1_27 114.4(19) . . ?
O_27 CA_27 C2_27 107.7(15) . . ?
C1_27 CA_27 C2_27 106(2) . . ?
C_28 O_28 Al1_20 137.2(8) . . ?
O_28 C_28 C2_28 110.4(12) . . ?
O_28 C_28 C1_28 109.7(13) . . ?
C2_28 C_28 C1_28 111.5(13) . . ?
C_29 O_29 Al2_20 134.1(10) . . ?
C2_29 C_29 O_29 109.5(14) . . ?
C2_29 C_29 C1_29 111.9(16) . . ?
O_29 C_29 C1_29 107.5(14) . . ?
C_210 O_210 Al2_20 137.1(9) . . ?
O_210 C_210 C1_210 106.3(12) . . ?
O_210 C_210 C2_210 109.0(10) . . ?
C1_210 C_210 C2_210 114.5(13) . . ?
C_211 O_211 Al3_20 135.0(10) . . ?
O_211 C_211 C2_211 110.3(13) . . ?
O_211 C_211 C1_211 109.2(10) . . ?
C2_211 C_211 C1_211 112.9(14) . . ?
CA_212 O_212 Al3_20 142.9(10) . . ?
O_212 CA_212 C1_212 113.5(14) . . ?
O_212 CA_212 C2_212 110.4(19) . . ?
C1_212 CA_212 C2_212 115(2) . . ?

_diffrn_measured_fraction_theta_max     .838
_diffrn_reflns_theta_full              24.14
_diffrn_measured_fraction_theta_full    .838
_refine_diff_density_max     .454
_refine_diff_density_min    -.877
_refine_diff_density_rms     .088

#===END

data_eu4

_audit_creation_method            SHELXL-97
_chemical_name_systematic
;
 ?
;
_chemical_name_common             ?
_chemical_melting_point           ?
_chemical_formula_moiety          'C45 H110 Eu4 O15'
_chemical_formula_sum
 'C45 H110 Eu4 O15'
_chemical_formula_weight          1499.17

loop_
 _atom_type_symbol
 _atom_type_description
 _atom_type_scat_dispersion_real
 _atom_type_scat_dispersion_imag
 _atom_type_scat_source
 'C'  'C'    .0033    .0016
 'International Tables Vol C Tables 4.2.6.8 and 6.1.1.4'
 'H'  'H'    .0000    .0000
 'International Tables Vol C Tables 4.2.6.8 and 6.1.1.4'
 'O'  'O'    .0106    .0060
 'International Tables Vol C Tables 4.2.6.8 and 6.1.1.4'
 'Eu'  'Eu'   -.1578   3.6682
 'International Tables Vol C Tables 4.2.6.8 and 6.1.1.4'

_symmetry_cell_setting            monoclinic
_symmetry_space_group_name_H-M    'P 21/n'

loop_
 _symmetry_equiv_pos_as_xyz
 'x, y, z'
 '-x+1/2, y+1/2, -z+1/2'
 '-x, -y, -z'
 'x-1/2, -y-1/2, z-1/2'

_cell_length_a                    23.246(5)
_cell_length_b                    22.372(5)
_cell_length_c                    27.466(6)
_cell_angle_alpha                 90.00
_cell_angle_beta                  108.30(2)
_cell_angle_gamma                 90.00
_cell_volume                      13562(5)
_cell_formula_units_Z             8
_cell_measurement_temperature     150(2)
_cell_measurement_reflns_used     5000
_cell_measurement_theta_min       4.25
_cell_measurement_theta_max       22.05

_exptl_crystal_description        irregular
_exptl_crystal_colour             yellow
_exptl_crystal_size_max           0.6
_exptl_crystal_size_mid           0.3
_exptl_crystal_size_min           0.2
_exptl_crystal_density_meas       ?
_exptl_crystal_density_diffrn     1.469
_exptl_crystal_density_method     'not measured'
_exptl_crystal_F_000              6016
_exptl_absorpt_coefficient_mu     3.697
_exptl_absorpt_correction_type    numerical
_exptl_absorpt_correction_T_min   0.2018
_exptl_absorpt_correction_T_max   0.3785
_exptl_absorpt_process_details
 'X-SHAPE (STOE, 1996b), X-RED (STOE, 1996a)'

loop_
 _exptl_crystal_face_index_h
 _exptl_crystal_face_index_k
 _exptl_crystal_face_index_l
 _exptl_crystal_face_perp_dist
  22  -6  -1  0.3368
 -27   2  -3  0.3536
  10  17   1  0.1961
   0 -29  -3  0.2754
   3  -6  16  0.3543
 -11  -1 -30  0.4185
 -29   4  26  0.0842
   1   0  -1  0.2028


_exptl_special_details
;
 ?
;

_diffrn_ambient_temperature       150(2)
_diffrn_radiation_wavelength      0.71073
_diffrn_radiation_type            MoK\a
_diffrn_radiation_source          'fine-focus sealed tube'
_diffrn_radiation_monochromator   graphite
_diffrn_measurement_device_type   'STOE IPDS'
_diffrn_measurement_method        'phi oscillation'
_diffrn_detector_area_resol_mean  6.67
_diffrn_reflns_number             36127
_diffrn_reflns_av_R_equivalents   0.0882
_diffrn_reflns_av_sigmaI/netI     0.1125
_diffrn_reflns_limit_h_min        -20
_diffrn_reflns_limit_h_max        23
_diffrn_reflns_limit_k_min        -22
_diffrn_reflns_limit_k_max        22
_diffrn_reflns_limit_l_min        -27
_diffrn_reflns_limit_l_max        26
_diffrn_reflns_theta_min          1.98
_diffrn_reflns_theta_max          20.82
_reflns_number_total              13747
_reflns_number_gt                 7833
_reflns_threshold_expression      >2sigma(I)

_computing_data_collection        'IPDS (STOE, 1996c)'
_computing_cell_refinement        'IPDS (STOE, 1996c)'
_computing_data_reduction         'IPDS (STOE, 1996c)'
_computing_structure_solution     'SHELXS-97 (Sheldrick, 1990)'
_computing_structure_refinement   'SHELXL-97 (Sheldrick, 1997)'
_computing_molecular_graphics     'DIAMOND (Brandenburg, 1999)'
_computing_publication_material   ?

_refine_special_details
;
 Refinement of F^2^ against ALL reflections.  The weighted R-factor wR and
 goodness of fit S are based on F^2^, conventional R-factors R are based
 on F, with F set to zero for negative F^2^. The threshold expression of
 F^2^ > 2sigma(F^2^) is used only for calculating R-factors(gt) etc. and is
 not relevant to the choice of reflections for refinement.  R-factors based
 on F^2^ are statistically about twice as large as those based on F, and R-
 factors based on ALL data will be even larger.
;

_refine_ls_structure_factor_coef  Fsqd
_refine_ls_matrix_type            full
_refine_ls_weighting_scheme       calc
_refine_ls_weighting_details
 'calc w=1/[\s^2^(Fo^2^)+(0.0750P)^2^+0.0000P] where P=(Fo^2^+2Fc^2^)/3'
_atom_sites_solution_primary      direct
_atom_sites_solution_secondary    difmap
_atom_sites_solution_hydrogens    geom
_refine_ls_hydrogen_treatment     constr
_refine_ls_extinction_method      SHELXL
_refine_ls_extinction_coef        0.000065(12)
_refine_ls_extinction_expression
 'Fc^*^=kFc[1+0.001xFc^2^\l^3^/sin(2\q)]^-1/4^'
_refine_ls_number_reflns          13747
_refine_ls_number_parameters      855
_refine_ls_number_restraints      32
_refine_ls_R_factor_all           0.1049
_refine_ls_R_factor_gt            0.0611
_refine_ls_wR_factor_ref          0.1617
_refine_ls_wR_factor_gt           0.1441
_refine_ls_goodness_of_fit_ref    0.987
_refine_ls_restrained_S_all       0.986
_refine_ls_shift/su_max           0.001
_refine_ls_shift/su_mean          0.000

loop_
 _atom_site_label
 _atom_site_type_symbol
 _atom_site_fract_x
 _atom_site_fract_y
 _atom_site_fract_z
 _atom_site_U_iso_or_equiv
 _atom_site_adp_type
 _atom_site_occupancy
 _atom_site_symmetry_multiplicity
 _atom_site_calc_flag
 _atom_site_refinement_flags
 _atom_site_disorder_assembly
 _atom_site_disorder_group
Eu1 Eu 0.14804(5) 0.14785(4) -0.05843(4) 0.0472(3) Uani 1 1 d . A .
Eu2 Eu 0.33600(5) 0.17145(4) 0.12661(4) 0.0513(3) Uani 1 1 d . A .
Eu3 Eu 0.21072(4) 0.07136(4) 0.06317(3) 0.0440(3) Uani 1 1 d . A .
Eu4 Eu 0.31033(5) 0.12589(4) -0.00577(4) 0.0488(3) Uani 1 1 d . A .
O_1 O 0.0906(6) 0.2449(5) -0.0971(4) 0.054(4) Uani 1 1 d . . .
C_1 C 0.1130(11) 0.3057(8) -0.0885(7) 0.065(6) Uani 1 1 d . . .
H0_1 H 0.1570 0.3030 -0.0684 0.078 Uiso 1 1 calc R . .
C1_1 C 0.0833(12) 0.3382(11) -0.0563(10) 0.099(8) Uiso 1 1 d . . .
H1A_1 H 0.0415 0.3477 -0.0765 0.118 Uiso 1 1 calc R . .
H1B_1 H 0.1055 0.3753 -0.0438 0.118 Uiso 1 1 calc R . .
H1C_1 H 0.0832 0.3131 -0.0270 0.118 Uiso 1 1 calc R . .
C2_1 C 0.1091(11) 0.3365(10) -0.1378(8) 0.083(7) Uiso 1 1 d . . .
H2A_1 H 0.0667 0.3388 -0.1594 0.100 Uiso 1 1 calc R . .
H2B_1 H 0.1324 0.3139 -0.1559 0.100 Uiso 1 1 calc R . .
H2C_1 H 0.1258 0.3769 -0.1306 0.100 Uiso 1 1 calc R . .
O_2 O 0.0546(6) 0.1140(6) -0.1317(5) 0.075(4) Uani 1 1 d . . .
CA_2 C 0.010(3) 0.064(2) -0.125(2) 0.065(9) Uiso 0.41(2) 1 d P A 1
HA_2 H -0.0184 0.0834 -0.1090 0.079 Uiso 0.41(2) 1 calc PR A 1
C1A_2 C -0.028(3) 0.052(3) -0.185(3) 0.11(3) Uiso 0.41(2) 1 d P A 1
H1A1_2 H -0.0186 0.0120 -0.1943 0.133 Uiso 0.41(2) 1 calc PR A 1
H1A2_2 H -0.0174 0.0819 -0.2062 0.133 Uiso 0.41(2) 1 calc PR A 1
H1A3_2 H -0.0716 0.0546 -0.1890 0.133 Uiso 0.41(2) 1 calc PR A 1
C2A_2 C 0.042(2) 0.019(2) -0.0919(19) 0.074(17) Uiso 0.41(2) 1 d P A 1
H2A1_2 H 0.0687 -0.0021 -0.1075 0.089 Uiso 0.41(2) 1 calc PR A 1
H2A2_2 H 0.0127 -0.0101 -0.0860 0.089 Uiso 0.41(2) 1 calc PR A 1
H2A3_2 H 0.0657 0.0362 -0.0592 0.089 Uiso 0.41(2) 1 calc PR A 1
CB_2 C 0.0395(17) 0.0499(15) -0.1512(14) 0.065(9) Uiso 0.59(2) 1 d P A 2
HB_2 H 0.0637 0.0222 -0.1238 0.079 Uiso 0.59(2) 1 calc PR A 2
C1B_2 C -0.0290(17) 0.0437(15) -0.1542(16) 0.060(11) Uiso 0.59(2) 1 d P A 2
H1B1_2 H -0.0511 0.0798 -0.1697 0.072 Uiso 0.59(2) 1 calc PR A 2
H1B2_2 H -0.0318 0.0385 -0.1196 0.072 Uiso 0.59(2) 1 calc PR A 2
H1B3_2 H -0.0468 0.0089 -0.1752 0.072 Uiso 0.59(2) 1 calc PR A 2
C2B_2 C 0.0514(17) 0.0340(15) -0.1994(13) 0.073(12) Uiso 0.59(2) 1 d P A 2
H2B1_2 H 0.0651 0.0695 -0.2135 0.088 Uiso 0.59(2) 1 calc PR A 2
H2B2_2 H 0.0142 0.0187 -0.2242 0.088 Uiso 0.59(2) 1 calc PR A 2
H2B3_2 H 0.0829 0.0031 -0.1925 0.088 Uiso 0.59(2) 1 calc PR A 2
O_3 O 0.4283(7) 0.1588(6) 0.2029(5) 0.078(5) Uani 1 1 d . . .
C_3 C 0.4609(17) 0.1136(19) 0.2401(11) 0.155(14) Uani 1 1 d . . .
H0_3 H 0.4869 0.1361 0.2705 0.185 Uiso 1 1 calc R . .
C1_3 C 0.4204(16) 0.0780(14) 0.2581(12) 0.136(12) Uiso 1 1 d . . .
H1A_3 H 0.4439 0.0514 0.2855 0.164 Uiso 1 1 calc R . .
H1B_3 H 0.3945 0.0541 0.2298 0.164 Uiso 1 1 calc R . .
H1C_3 H 0.3951 0.1043 0.2714 0.164 Uiso 1 1 calc R . .
C2_3 C 0.501(2) 0.0799(17) 0.2214(16) 0.187(18) Uiso 1 1 d . . .
H2A_3 H 0.4788 0.0623 0.1882 0.224 Uiso 1 1 calc R . .
H2B_3 H 0.5194 0.0480 0.2458 0.224 Uiso 1 1 calc R . .
H2C_3 H 0.5331 0.1061 0.2173 0.224 Uiso 1 1 calc R . .
O_4 O 0.3613(8) 0.2755(6) 0.1657(5) 0.090(6) Uani 1 1 d . . .
C_4 C 0.336(2) 0.3355(19) 0.1567(10) 0.20(2) Uani 1 1 d . . .
H0_4 H 0.2931 0.3315 0.1337 0.234 Uiso 1 1 calc R . .
C1_4 C 0.3706(16) 0.3718(15) 0.1273(14) 0.150(13) Uiso 1 1 d . . .
H1A_4 H 0.3491 0.4093 0.1152 0.180 Uiso 1 1 calc R . .
H1B_4 H 0.3733 0.3486 0.0979 0.180 Uiso 1 1 calc R . .
H1C_4 H 0.4114 0.3806 0.1501 0.180 Uiso 1 1 calc R . .
C2_4 C 0.3335(19) 0.3607(17) 0.2029(16) 0.195(17) Uiso 1 1 d . . .
H2A_4 H 0.3146 0.4002 0.1962 0.234 Uiso 1 1 calc R . .
H2B_4 H 0.3747 0.3646 0.2268 0.234 Uiso 1 1 calc R . .
H2C_4 H 0.3097 0.3348 0.2181 0.234 Uiso 1 1 calc R . .
O_5 O 0.1873(6) -0.0164(5) 0.0768(5) 0.067(4) Uani 1 1 d D . .
CA_5 C 0.188(2) -0.0811(10) 0.0799(17) 0.092(12) Uiso 0.56(5) 1 d PD B 1
HA_5 H 0.2215 -0.0927 0.0664 0.110 Uiso 0.56(5) 1 calc PR B 1
C1A_5 C 0.1312(18) -0.1040(18) 0.0387(14) 0.055(13) Uiso 0.56(5) 1 d PD B 1
H1A1_5 H 0.0970 -0.1043 0.0523 0.066 Uiso 0.56(5) 1 calc PR B 1
H1A2_5 H 0.1385 -0.1447 0.0288 0.066 Uiso 0.56(5) 1 calc PR B 1
H1A3_5 H 0.1220 -0.0779 0.0086 0.066 Uiso 0.56(5) 1 calc PR B 1
C2A_5 C 0.211(3) -0.100(2) 0.1358(17) 0.11(2) Uiso 0.56(5) 1 d PD B 1
H2A1_5 H 0.2267 -0.0646 0.1572 0.134 Uiso 0.56(5) 1 calc PR B 1
H2A2_5 H 0.2438 -0.1291 0.1405 0.134 Uiso 0.56(5) 1 calc PR B 1
H2A3_5 H 0.1781 -0.1177 0.1458 0.134 Uiso 0.56(5) 1 calc PR B 1
CB_5 C 0.158(3) -0.0698(18) 0.0859(16) 0.092(12) Uiso 0.44(5) 1 d PD B 2
HB_5 H 0.1149 -0.0592 0.0817 0.110 Uiso 0.44(5) 1 calc PR B 2
C1B_5 C 0.157(4) -0.112(3) 0.042(2) 0.09(2) Uiso 0.44(5) 1 d PD B 2
H1B1_5 H 0.1168 -0.1117 0.0163 0.114 Uiso 0.44(5) 1 calc PR B 2
H1B2_5 H 0.1679 -0.1522 0.0548 0.114 Uiso 0.44(5) 1 calc PR B 2
H1B3_5 H 0.1869 -0.0976 0.0255 0.114 Uiso 0.44(5) 1 calc PR B 2
C2B_5 C 0.186(3) -0.093(3) 0.1403(18) 0.08(2) Uiso 0.44(5) 1 d PD B 2
H2B1_5 H 0.2168 -0.0653 0.1600 0.096 Uiso 0.44(5) 1 calc PR B 2
H2B2_5 H 0.2041 -0.1324 0.1393 0.096 Uiso 0.44(5) 1 calc PR B 2
H2B3_5 H 0.1540 -0.0970 0.1567 0.096 Uiso 0.44(5) 1 calc PR B 2
O_6 O 0.3634(6) 0.0837(6) -0.0450(5) 0.070(4) Uani 1 1 d D . .
CA_6 C 0.4055(17) 0.0639(15) -0.0692(16) 0.127(12) Uiso 0.70(3) 1 d PD C 1
HA_6 H 0.3729 0.0578 -0.1026 0.152 Uiso 0.70(3) 1 calc PR C 1
C1A_6 C 0.439(2) 0.1069(17) -0.0928(17) 0.118(14) Uiso 0.70(3) 1 d PD C 1
H1A1_6 H 0.4126 0.1408 -0.1078 0.141 Uiso 0.70(3) 1 calc PR C 1
H1A2_6 H 0.4509 0.0864 -0.1197 0.141 Uiso 0.70(3) 1 calc PR C 1
H1A3_6 H 0.4753 0.1215 -0.0664 0.141 Uiso 0.70(3) 1 calc PR C 1
C2A_6 C 0.417(2) -0.0027(15) -0.0620(17) 0.139(16) Uiso 0.70(3) 1 d PD C 1
H2A1_6 H 0.4461 -0.0102 -0.0280 0.167 Uiso 0.70(3) 1 calc PR C 1
H2A2_6 H 0.4341 -0.0175 -0.0883 0.167 Uiso 0.70(3) 1 calc PR C 1
H2A3_6 H 0.3791 -0.0235 -0.0652 0.167 Uiso 0.70(3) 1 calc PR C 1
CB_6 C 0.392(3) 0.053(3) -0.077(2) 0.127(12) Uiso 0.30(3) 1 d PD C 2
HB_6 H 0.3798 0.0110 -0.0861 0.152 Uiso 0.30(3) 1 calc PR C 2
C1B_6 C 0.396(5) 0.094(4) -0.121(3) 0.118(14) Uiso 0.30(3) 1 d PD C 2
H1B1_6 H 0.3551 0.1027 -0.1433 0.141 Uiso 0.30(3) 1 calc PR C 2
H1B2_6 H 0.4188 0.0732 -0.1404 0.141 Uiso 0.30(3) 1 calc PR C 2
H1B3_6 H 0.4167 0.1309 -0.1066 0.141 Uiso 0.30(3) 1 calc PR C 2
C2B_6 C 0.453(4) 0.063(4) -0.036(3) 0.139(16) Uiso 0.30(3) 1 d PD C 2
H2B1_6 H 0.4676 0.1039 -0.0388 0.167 Uiso 0.30(3) 1 calc PR C 2
H2B2_6 H 0.4825 0.0342 -0.0397 0.167 Uiso 0.30(3) 1 calc PR C 2
H2B3_6 H 0.4480 0.0587 -0.0017 0.167 Uiso 0.30(3) 1 calc PR C 2
O_7 O 0.1206(5) 0.1121(5) 0.0157(4) 0.049(3) Uani 1 1 d . . .
CA_7 C 0.064(4) 0.117(3) 0.021(3) 0.073(10) Uiso 0.55(2) 1 d P A 1
HA_7 H 0.0363 0.0923 -0.0073 0.088 Uiso 0.55(2) 1 calc PR A 1
C1A_7 C 0.034(2) 0.1764(18) 0.0176(18) 0.082(11) Uiso 0.55(2) 1 d P A 1
H1A1_7 H 0.0563 0.2010 0.0469 0.099 Uiso 0.55(2) 1 calc PR A 1
H1A2_7 H -0.0079 0.1712 0.0179 0.099 Uiso 0.55(2) 1 calc PR A 1
H1A3_7 H 0.0335 0.1962 -0.0143 0.099 Uiso 0.55(2) 1 calc PR A 1
C2A_7 C 0.0624(19) 0.0859(17) 0.0729(15) 0.080(9) Uiso 0.55(2) 1 d P A 1
H2A1_7 H 0.0496 0.0442 0.0661 0.096 Uiso 0.55(2) 1 calc PR A 1
H2A2_7 H 0.0339 0.1072 0.0864 0.096 Uiso 0.55(2) 1 calc PR A 1
H2A3_7 H 0.1031 0.0874 0.0980 0.096 Uiso 0.55(2) 1 calc PR A 1
CB_7 C 0.057(4) 0.104(4) 0.017(3) 0.073(10) Uiso 0.45(2) 1 d P A 2
HB_7 H 0.0377 0.1207 -0.0177 0.088 Uiso 0.45(2) 1 calc PR A 2
C1B_7 C 0.040(3) 0.152(2) 0.042(2) 0.082(11) Uiso 0.45(2) 1 d P A 2
H1B1_7 H -0.0040 0.1594 0.0273 0.099 Uiso 0.45(2) 1 calc PR A 2
H1B2_7 H 0.0619 0.1881 0.0381 0.099 Uiso 0.45(2) 1 calc PR A 2
H1B3_7 H 0.0490 0.1432 0.0789 0.099 Uiso 0.45(2) 1 calc PR A 2
C2B_7 C 0.037(2) 0.041(2) 0.0008(19) 0.080(9) Uiso 0.45(2) 1 d P A 2
H2B1_7 H 0.0551 0.0282 -0.0251 0.096 Uiso 0.45(2) 1 calc PR A 2
H2B2_7 H -0.0074 0.0400 -0.0139 0.096 Uiso 0.45(2) 1 calc PR A 2
H2B3_7 H 0.0497 0.0144 0.0305 0.096 Uiso 0.45(2) 1 calc PR A 2
O_8 O 0.2442(5) 0.1768(5) -0.0720(5) 0.054(3) Uani 1 1 d . . .
C_8 C 0.2526(10) 0.1927(11) -0.1218(8) 0.082(7) Uani 1 1 d . A .
H0_8 H 0.2851 0.1667 -0.1270 0.098 Uiso 1 1 calc R . .
C1_8 C 0.2731(11) 0.2566(10) -0.1194(9) 0.089(7) Uiso 1 1 d . . .
H1A_8 H 0.2739 0.2692 -0.1534 0.106 Uiso 1 1 calc R A .
H1B_8 H 0.3138 0.2602 -0.0946 0.106 Uiso 1 1 calc R . .
H1C_8 H 0.2449 0.2821 -0.1087 0.106 Uiso 1 1 calc R . .
C2_8 C 0.1925(10) 0.1792(10) -0.1648(8) 0.081(7) Uiso 1 1 d . . .
H2A_8 H 0.1826 0.1367 -0.1639 0.097 Uiso 1 1 calc R A .
H2B_8 H 0.1972 0.1888 -0.1982 0.097 Uiso 1 1 calc R . .
H2C_8 H 0.1599 0.2034 -0.1596 0.097 Uiso 1 1 calc R . .
O_9 O 0.3758(6) 0.1838(5) 0.0545(4) 0.059(4) Uani 1 1 d . . .
C_9 C 0.4299(10) 0.2190(10) 0.0573(8) 0.071(6) Uani 1 1 d . A .
H0_9 H 0.4368 0.2477 0.0865 0.085 Uiso 1 1 calc R . .
C1_9 C 0.4821(12) 0.1779(11) 0.0694(10) 0.099(8) Uiso 1 1 d . . .
H1A_9 H 0.4874 0.1589 0.1026 0.119 Uiso 1 1 calc R A .
H1B_9 H 0.5188 0.2004 0.0707 0.119 Uiso 1 1 calc R . .
H1C_9 H 0.4748 0.1472 0.0427 0.119 Uiso 1 1 calc R . .
C2_9 C 0.4209(12) 0.2533(10) 0.0112(9) 0.096(8) Uiso 1 1 d . . .
H2A_9 H 0.4151 0.2262 -0.0179 0.116 Uiso 1 1 calc R A .
H2B_9 H 0.4565 0.2785 0.0148 0.116 Uiso 1 1 calc R . .
H2C_9 H 0.3850 0.2787 0.0054 0.116 Uiso 1 1 calc R . .
O_10 O 0.2499(6) 0.1158(5) 0.1421(4) 0.054(3) Uani 1 1 d D . .
CA_10 C 0.2253(17) 0.1268(14) 0.1825(11) 0.060(9) Uiso 0.60(4) 1 d PD A 1
HA_10 H 0.1855 0.1448 0.1625 0.072 Uiso 0.60(4) 1 calc PR A 1
C1A_10 C 0.254(2) 0.1801(18) 0.2160(16) 0.081(15) Uiso 0.60(4) 1 d PD A 1
H1A1_10 H 0.2975 0.1734 0.2311 0.098 Uiso 0.60(4) 1 calc PR A 1
H1A2_10 H 0.2355 0.1846 0.2434 0.098 Uiso 0.60(4) 1 calc PR A 1
H1A3_10 H 0.2468 0.2164 0.1950 0.098 Uiso 0.60(4) 1 calc PR A 1
C2A_10 C 0.203(2) 0.0696(14) 0.2008(15) 0.081(14) Uiso 0.60(4) 1 d PD A 1
H2A1_10 H 0.1727 0.0505 0.1719 0.098 Uiso 0.60(4) 1 calc PR A 1
H2A2_10 H 0.1851 0.0792 0.2276 0.098 Uiso 0.60(4) 1 calc PR A 1
H2A3_10 H 0.2374 0.0423 0.2146 0.098 Uiso 0.60(4) 1 calc PR A 1
CB_10 C 0.239(2) 0.101(3) 0.1885(11) 0.060(9) Uiso 0.40(4) 1 d PD A 2
HB_10 H 0.2621 0.0644 0.2046 0.072 Uiso 0.40(4) 1 calc PR A 2
C1B_10 C 0.262(3) 0.157(3) 0.220(2) 0.08(2) Uiso 0.40(4) 1 d PD A 2
H1B1_10 H 0.3032 0.1491 0.2437 0.090 Uiso 0.40(4) 1 calc PR A 2
H1B2_10 H 0.2354 0.1671 0.2403 0.090 Uiso 0.40(4) 1 calc PR A 2
H1B3_10 H 0.2637 0.1900 0.1975 0.090 Uiso 0.40(4) 1 calc PR A 2
C2B_10 C 0.171(2) 0.091(4) 0.177(3) 0.12(3) Uiso 0.40(4) 1 d PD A 2
H2B1_10 H 0.1481 0.1223 0.1544 0.148 Uiso 0.40(4) 1 calc PR A 2
H2B2_10 H 0.1606 0.0911 0.2092 0.148 Uiso 0.40(4) 1 calc PR A 2
H2B3_10 H 0.1592 0.0517 0.1602 0.148 Uiso 0.40(4) 1 calc PR A 2
O_11 O 0.3155(5) 0.0742(5) 0.0724(4) 0.045(3) Uani 1 1 d . . .
C_11 C 0.3677(8) 0.0399(8) 0.1054(7) 0.050(5) Uani 1 1 d . A .
H0_11 H 0.3930 0.0674 0.1324 0.060 Uiso 1 1 calc R . .
C1_11 C 0.3421(9) -0.0083(8) 0.1315(7) 0.062(6) Uiso 1 1 d . . .
H1A_11 H 0.3130 -0.0326 0.1055 0.075 Uiso 1 1 calc R A .
H1B_11 H 0.3215 0.0104 0.1538 0.075 Uiso 1 1 calc R . .
H1C_11 H 0.3751 -0.0337 0.1522 0.075 Uiso 1 1 calc R . .
C2_11 C 0.4048(10) 0.0159(9) 0.0782(8) 0.074(6) Uiso 1 1 d . . .
H2A_11 H 0.4361 -0.0094 0.1011 0.089 Uiso 1 1 calc R A .
H2B_11 H 0.4239 0.0485 0.0651 0.089 Uiso 1 1 calc R . .
H2C_11 H 0.3799 -0.0081 0.0494 0.089 Uiso 1 1 calc R . .
O_12 O 0.2213(5) 0.0626(5) -0.0231(4) 0.041(3) Uani 1 1 d . . .
C_12 C 0.2116(9) 0.0075(7) -0.0499(7) 0.048(5) Uani 1 1 d . A .
H0_12 H 0.1710 -0.0082 -0.0508 0.058 Uiso 1 1 calc R . .
C1_12 C 0.2573(10) -0.0373(9) -0.0253(8) 0.076(7) Uiso 1 1 d . . .
H1A_12 H 0.2965 -0.0254 -0.0285 0.091 Uiso 1 1 calc R A .
H1B_12 H 0.2454 -0.0761 -0.0420 0.091 Uiso 1 1 calc R . .
H1C_12 H 0.2606 -0.0405 0.0111 0.091 Uiso 1 1 calc R . .
C2_12 C 0.2099(10) 0.0207(9) -0.1055(7) 0.066(6) Uiso 1 1 d . . .
H2A_12 H 0.1763 0.0481 -0.1216 0.080 Uiso 1 1 calc R A .
H2B_12 H 0.2040 -0.0167 -0.1250 0.080 Uiso 1 1 calc R . .
H2C_12 H 0.2482 0.0391 -0.1053 0.080 Uiso 1 1 calc R . .
O_13 O 0.2387(5) 0.1704(4) 0.0353(4) 0.047(3) Uani 1 1 d . . .
C_13 C 0.2112(9) 0.2291(8) 0.0359(8) 0.056(6) Uani 1 1 d . A .
H0_13 H 0.1732 0.2299 0.0060 0.067 Uiso 1 1 calc R . .
C1_13 C 0.1933(10) 0.2404(9) 0.0811(8) 0.064(6) Uiso 1 1 d . . .
H1A_13 H 0.2293 0.2406 0.1115 0.077 Uiso 1 1 calc R A .
H1B_13 H 0.1655 0.2089 0.0845 0.077 Uiso 1 1 calc R . .
H1C_13 H 0.1729 0.2792 0.0777 0.077 Uiso 1 1 calc R . .
C2_13 C 0.2544(9) 0.2766(8) 0.0249(7) 0.060(6) Uiso 1 1 d . . .
H2A_13 H 0.2374 0.3166 0.0255 0.072 Uiso 1 1 calc R A .
H2B_13 H 0.2588 0.2691 -0.0089 0.072 Uiso 1 1 calc R . .
H2C_13 H 0.2941 0.2740 0.0512 0.072 Uiso 1 1 calc R . .
Eu1_20 Eu 0.36611(4) 0.17351(4) -0.36323(4) 0.0468(3) Uani 1 1 d . . .
Eu2_20 Eu 0.16142(4) 0.14301(4) -0.53920(4) 0.0463(3) Uani 1 1 d . . .
Eu3_20 Eu 0.22340(4) 0.09236(4) -0.40687(3) 0.0443(3) Uani 1 1 d . D .
Eu4_20 Eu 0.32047(4) 0.09936(4) -0.48791(4) 0.0469(3) Uani 1 1 d . D .
O_21 O 0.3995(5) 0.2815(5) -0.3304(4) 0.050(3) Uani 1 1 d . . .
C_21 C 0.3782(9) 0.3416(8) -0.3435(7) 0.057(5) Uani 1 1 d . . .
H0_21 H 0.3351 0.3401 -0.3660 0.068 Uiso 1 1 calc R D .
C1_21 C 0.4158(10) 0.3703(9) -0.3726(8) 0.073(6) Uiso 1 1 d . . .
H1A_21 H 0.4557 0.3806 -0.3488 0.087 Uiso 1 1 calc R . .
H1B_21 H 0.3955 0.4067 -0.3894 0.087 Uiso 1 1 calc R . .
H1C_21 H 0.4206 0.3425 -0.3986 0.087 Uiso 1 1 calc R . .
C2_21 C 0.3811(10) 0.3738(9) -0.2954(8) 0.071(6) Uiso 1 1 d . . .
H2A_21 H 0.3519 0.3561 -0.2804 0.085 Uiso 1 1 calc R . .
H2B_21 H 0.3712 0.4160 -0.3031 0.085 Uiso 1 1 calc R . .
H2C_21 H 0.4220 0.3705 -0.2710 0.085 Uiso 1 1 calc R . .
O_22 O 0.4658(6) 0.1622(5) -0.2869(5) 0.062(4) Uani 1 1 d . . .
C_22 C 0.4996(11) 0.1117(10) -0.2579(8) 0.080(7) Uani 1 1 d . . .
H0_22 H 0.4753 0.0765 -0.2755 0.096 Uiso 1 1 calc R D .
C1_22 C 0.5563(13) 0.1035(12) -0.2678(11) 0.113(9) Uiso 1 1 d . . .
H1A_22 H 0.5817 0.1390 -0.2563 0.136 Uiso 1 1 calc R . .
H1B_22 H 0.5487 0.0977 -0.3046 0.136 Uiso 1 1 calc R . .
H1C_22 H 0.5771 0.0684 -0.2491 0.136 Uiso 1 1 calc R . .
C2_22 C 0.4926(14) 0.1095(13) -0.2078(11) 0.122(10) Uiso 1 1 d . . .
H2A_22 H 0.5149 0.0751 -0.1889 0.146 Uiso 1 1 calc R . .
H2B_22 H 0.4496 0.1055 -0.2111 0.146 Uiso 1 1 calc R . .
H2C_22 H 0.5086 0.1463 -0.1891 0.146 Uiso 1 1 calc R . .
O_23 O 0.0858(5) 0.1021(5) -0.6213(4) 0.051(3) Uani 1 1 d . D .
C_23 C 0.0761(10) 0.0444(9) -0.6462(8) 0.066(6) Uani 1 1 d . . .
H0_23 H 0.1081 0.0172 -0.6247 0.079 Uiso 1 1 calc R D .
C1_23 C 0.0148(11) 0.0196(10) -0.6446(9) 0.094(8) Uiso 1 1 d . D .
H1A_23 H -0.0181 0.0368 -0.6728 0.112 Uiso 1 1 calc R . .
H1B_23 H 0.0090 0.0303 -0.6118 0.112 Uiso 1 1 calc R . .
H1C_23 H 0.0145 -0.0240 -0.6481 0.112 Uiso 1 1 calc R . .
C2_23 C 0.0843(12) 0.0469(11) -0.6969(10) 0.103(8) Uiso 1 1 d . D .
H2A_23 H 0.0486 0.0654 -0.7214 0.123 Uiso 1 1 calc R . .
H2B_23 H 0.0894 0.0063 -0.7083 0.123 Uiso 1 1 calc R . .
H2C_23 H 0.1204 0.0707 -0.6950 0.123 Uiso 1 1 calc R . .
O_24 O 0.0979(5) 0.2316(5) -0.5857(5) 0.053(3) Uani 1 1 d . D .
C_24 C 0.0898(11) 0.2951(12) -0.5784(9) 0.091(8) Uani 1 1 d . . .
H0_24 H 0.0521 0.3080 -0.6056 0.109 Uiso 1 1 calc R D .
C1_24 C 0.1399(12) 0.3278(11) -0.5864(10) 0.107(9) Uiso 1 1 d . D .
H1A_24 H 0.1464 0.3141 -0.6182 0.129 Uiso 1 1 calc R . .
H1B_24 H 0.1767 0.3207 -0.5574 0.129 Uiso 1 1 calc R . .
H1C_24 H 0.1305 0.3706 -0.5889 0.129 Uiso 1 1 calc R . .
C2_24 C 0.0797(13) 0.3047(12) -0.5272(11) 0.119(10) Uiso 1 1 d . D .
H2A_24 H 0.0673 0.3461 -0.5248 0.143 Uiso 1 1 calc R . .
H2B_24 H 0.1174 0.2965 -0.4995 0.143 Uiso 1 1 calc R . .
H2C_24 H 0.0478 0.2776 -0.5242 0.143 Uiso 1 1 calc R . .
O_25 O 0.1905(6) 0.0215(6) -0.3718(5) 0.072(4) Uani 1 1 d . . .
C_25 C 0.1646(13) -0.0212(11) -0.3490(11) 0.105(9) Uani 1 1 d . D .
H0_25 H 0.1226 -0.0278 -0.3727 0.126 Uiso 1 1 calc R . .
C1_25 C 0.1960(14) -0.0792(12) -0.3440(11) 0.123(10) Uiso 1 1 d . . .
H1A_25 H 0.1934 -0.0942 -0.3782 0.148 Uiso 1 1 calc R D .
H1B_25 H 0.1769 -0.1078 -0.3269 0.148 Uiso 1 1 calc R . .
H1C_25 H 0.2387 -0.0741 -0.3237 0.148 Uiso 1 1 calc R . .
C2_25 C 0.1577(15) 0.0045(14) -0.2988(12) 0.143(12) Uiso 1 1 d . . .
H2A_25 H 0.1976 0.0066 -0.2726 0.172 Uiso 1 1 calc R D .
H2B_25 H 0.1311 -0.0216 -0.2867 0.172 Uiso 1 1 calc R . .
H2C_25 H 0.1401 0.0446 -0.3052 0.172 Uiso 1 1 calc R . .
O_26 O 0.3603(6) 0.0337(6) -0.5212(5) 0.068(4) Uani 1 1 d . . .
C_26 C 0.3904(11) -0.0100(11) -0.5438(11) 0.098(9) Uani 1 1 d . D .
H0_26 H 0.4188 -0.0336 -0.5153 0.118 Uiso 1 1 calc R . .
C1_26 C 0.3409(13) -0.0541(12) -0.5777(10) 0.114(9) Uiso 1 1 d . . .
H1A_26 H 0.3220 -0.0759 -0.5558 0.137 Uiso 1 1 calc R D .
H1B_26 H 0.3600 -0.0825 -0.5950 0.137 Uiso 1 1 calc R . .
H1C_26 H 0.3099 -0.0312 -0.6034 0.137 Uiso 1 1 calc R . .
C2_26 C 0.4298(15) 0.0270(14) -0.5714(12) 0.145(12) Uiso 1 1 d . . .
H2A_26 H 0.4028 0.0494 -0.6003 0.174 Uiso 1 1 calc R D .
H2B_26 H 0.4546 -0.0005 -0.5841 0.174 Uiso 1 1 calc R . .
H2C_26 H 0.4561 0.0550 -0.5469 0.174 Uiso 1 1 calc R . .
O_27 O 0.2755(5) 0.1500(5) -0.3391(4) 0.047(3) Uani 1 1 d . D .
C_27 C 0.2634(13) 0.1634(9) -0.2929(8) 0.082(8) Uani 1 1 d . . .
H0_27 H 0.2229 0.1451 -0.2971 0.098 Uiso 1 1 calc R D .
C1_27 C 0.2556(11) 0.2267(10) -0.2845(9) 0.086(7) Uiso 1 1 d . . .
H1A_27 H 0.2934 0.2480 -0.2814 0.104 Uiso 1 1 calc R . .
H1B_27 H 0.2451 0.2318 -0.2529 0.104 Uiso 1 1 calc R . .
H1C_27 H 0.2231 0.2429 -0.3135 0.104 Uiso 1 1 calc R . .
C2_27 C 0.3055(12) 0.1318(11) -0.2489(10) 0.107(9) Uiso 1 1 d . . .
H2A_27 H 0.3111 0.0907 -0.2588 0.128 Uiso 1 1 calc R . .
H2B_27 H 0.2887 0.1313 -0.2204 0.128 Uiso 1 1 calc R . .
H2C_27 H 0.3447 0.1524 -0.2383 0.128 Uiso 1 1 calc R . .
O_28 O 0.3987(5) 0.1582(5) -0.4397(4) 0.049(3) Uani 1 1 d . D .
C_28 C 0.4484(9) 0.1880(10) -0.4481(7) 0.066(6) Uani 1 1 d . . .
H0_28 H 0.4539 0.2282 -0.4315 0.079 Uiso 1 1 calc R D .
C1_28 C 0.4366(12) 0.1945(11) -0.5034(9) 0.096(8) Uiso 1 1 d . . .
H1A_28 H 0.4403 0.1555 -0.5183 0.116 Uiso 1 1 calc R . .
H1B_28 H 0.4661 0.2223 -0.5097 0.116 Uiso 1 1 calc R . .
H1C_28 H 0.3956 0.2102 -0.5191 0.116 Uiso 1 1 calc R . .
C2_28 C 0.5037(11) 0.1513(10) -0.4260(9) 0.087(7) Uiso 1 1 d . . .
H2A_28 H 0.5092 0.1436 -0.3897 0.104 Uiso 1 1 calc R . .
H2B_28 H 0.5391 0.1729 -0.4292 0.104 Uiso 1 1 calc R . .
H2C_28 H 0.4994 0.1133 -0.4445 0.104 Uiso 1 1 calc R . .
O_29 O 0.2578(6) 0.1465(5) -0.5586(4) 0.053(3) Uani 1 1 d D D .
CA_29 C 0.2736(19) 0.1545(14) -0.6048(10) 0.060(9) Uiso 0.52(3) 1 d PD D 1
HA_29 H 0.3183 0.1492 -0.5970 0.072 Uiso 0.52(3) 1 calc PR D 1
C1A_29 C 0.240(2) 0.1045(15) -0.6404(15) 0.064(9) Uiso 0.52(3) 1 d PD D 1
H1A1_29 H 0.2528 0.0657 -0.6239 0.077 Uiso 0.52(3) 1 calc PR D 1
H1A2_29 H 0.2499 0.1063 -0.6726 0.077 Uiso 0.52(3) 1 calc PR D 1
H1A3_29 H 0.1964 0.1094 -0.6476 0.077 Uiso 0.52(3) 1 calc PR D 1
C2A_29 C 0.256(3) 0.2168(17) -0.624(3) 0.098(11) Uiso 0.52(3) 1 d PD D 1
H2A1_29 H 0.2155 0.2259 -0.6224 0.117 Uiso 0.52(3) 1 calc PR D 1
H2A2_29 H 0.2556 0.2196 -0.6600 0.117 Uiso 0.52(3) 1 calc PR D 1
H2A3_29 H 0.2853 0.2454 -0.6033 0.117 Uiso 0.52(3) 1 calc PR D 1
CB_29 C 0.2405(18) 0.1567(15) -0.6124(8) 0.060(9) Uiso 0.48(3) 1 d PD D 2
HB_29 H 0.1957 0.1571 -0.6294 0.072 Uiso 0.48(3) 1 calc PR D 2
C1B_29 C 0.274(2) 0.1098(15) -0.6342(17) 0.064(9) Uiso 0.48(3) 1 d PD D 2
H1B1_29 H 0.3168 0.1095 -0.6140 0.077 Uiso 0.48(3) 1 calc PR D 2
H1B2_29 H 0.2695 0.1197 -0.6700 0.077 Uiso 0.48(3) 1 calc PR D 2
H1B3_29 H 0.2562 0.0703 -0.6327 0.077 Uiso 0.48(3) 1 calc PR D 2
C2B_29 C 0.272(3) 0.2144(13) -0.619(3) 0.098(11) Uiso 0.48(3) 1 d PD D 2
H2B1_29 H 0.2492 0.2484 -0.6112 0.117 Uiso 0.48(3) 1 calc PR D 2
H2B2_29 H 0.2725 0.2174 -0.6541 0.117 Uiso 0.48(3) 1 calc PR D 2
H2B3_29 H 0.3131 0.2146 -0.5951 0.117 Uiso 0.48(3) 1 calc PR D 2
O_210 O 0.1354(5) 0.1332(5) -0.4593(4) 0.047(3) Uani 1 1 d . D .
C_210 C 0.0780(10) 0.1442(9) -0.4529(7) 0.065(6) Uani 1 1 d . . .
H0_210 H 0.0583 0.1778 -0.4763 0.078 Uiso 1 1 calc R D .
C1_210 C 0.0862(12) 0.1632(11) -0.4000(9) 0.103(8) Uiso 1 1 d . D .
H1A_210 H 0.1127 0.1347 -0.3762 0.124 Uiso 1 1 calc R . .
H1B_210 H 0.0468 0.1644 -0.3941 0.124 Uiso 1 1 calc R . .
H1C_210 H 0.1047 0.2030 -0.3943 0.124 Uiso 1 1 calc R . .
C2_210 C 0.0377(12) 0.0885(11) -0.4689(10) 0.099(8) Uiso 1 1 d . D .
H2A_210 H 0.0332 0.0785 -0.5047 0.119 Uiso 1 1 calc R . .
H2B_210 H -0.0023 0.0966 -0.4655 0.119 Uiso 1 1 calc R . .
H2C_210 H 0.0564 0.0548 -0.4468 0.119 Uiso 1 1 calc R . .
O_211 O 0.3286(5) 0.0697(4) -0.4010(4) 0.038(3) Uani 1 1 d D D .
CA_211 C 0.3750(13) 0.0374(17) -0.3629(12) 0.029(6) Uiso 0.42(3) 1 d PD D 1
HA_211 H 0.4016 0.0658 -0.3376 0.034 Uiso 0.42(3) 1 calc PR D 1
C1A_211 C 0.411(2) 0.006(2) -0.3928(19) 0.047(8) Uiso 0.42(3) 1 d PD D 1
H1A1_211 H 0.3850 -0.0223 -0.4170 0.056 Uiso 0.42(3) 1 calc PR D 1
H1A2_211 H 0.4451 -0.0157 -0.3689 0.056 Uiso 0.42(3) 1 calc PR D 1
H1A3_211 H 0.4269 0.0356 -0.4117 0.056 Uiso 0.42(3) 1 calc PR D 1
C2A_211 C 0.345(2) -0.0064(18) -0.3358(19) 0.044(7) Uiso 0.42(3) 1 d PD D 1
H2A1_211 H 0.3173 0.0152 -0.3218 0.053 Uiso 0.42(3) 1 calc PR D 1
H2A2_211 H 0.3764 -0.0262 -0.3079 0.053 Uiso 0.42(3) 1 calc PR D 1
H2A3_211 H 0.3226 -0.0365 -0.3604 0.053 Uiso 0.42(3) 1 calc PR D 1
CB_211 C 0.3586(12) 0.0148(11) -0.3792(9) 0.029(6) Uiso 0.58(3) 1 d PD D 2
HB_211 H 0.3365 -0.0209 -0.3979 0.034 Uiso 0.58(3) 1 calc PR D 2
C1B_211 C 0.4231(12) 0.0174(17) -0.3814(14) 0.047(8) Uiso 0.58(3) 1 d PD D 2
H1B1_211 H 0.4223 0.0270 -0.4165 0.056 Uiso 0.58(3) 1 calc PR D 2
H1B2_211 H 0.4428 -0.0214 -0.3714 0.056 Uiso 0.58(3) 1 calc PR D 2
H1B3_211 H 0.4458 0.0483 -0.3579 0.056 Uiso 0.58(3) 1 calc PR D 2
C2B_211 C 0.3613(16) 0.0140(16) -0.3233(9) 0.044(7) Uiso 0.58(3) 1 d PD D 2
H2B1_211 H 0.3837 0.0491 -0.3058 0.053 Uiso 0.58(3) 1 calc PR D 2
H2B2_211 H 0.3820 -0.0224 -0.3069 0.053 Uiso 0.58(3) 1 calc PR D 2
H2B3_211 H 0.3201 0.0148 -0.3210 0.053 Uiso 0.58(3) 1 calc PR D 2
O_212 O 0.2239(5) 0.0547(5) -0.4896(4) 0.043(3) Uani 1 1 d . D .
C_212 C 0.2034(9) -0.0028(7) -0.5121(7) 0.047(5) Uani 1 1 d . . .
H0_212 H 0.2031 -0.0029 -0.5486 0.057 Uiso 1 1 calc R D .
C1_212 C 0.2427(11) -0.0516(10) -0.4841(9) 0.087(7) Uiso 1 1 d . D .
H1A_212 H 0.2829 -0.0478 -0.4883 0.104 Uiso 1 1 calc R . .
H1B_212 H 0.2249 -0.0902 -0.4979 0.104 Uiso 1 1 calc R . .
H1C_212 H 0.2464 -0.0492 -0.4476 0.104 Uiso 1 1 calc R . .
C2_212 C 0.1389(9) -0.0138(8) -0.5106(7) 0.056(5) Uiso 1 1 d . D .
H2A_212 H 0.1393 -0.0157 -0.4748 0.068 Uiso 1 1 calc R . .
H2B_212 H 0.1238 -0.0517 -0.5277 0.068 Uiso 1 1 calc R . .
H2C_212 H 0.1125 0.0189 -0.5282 0.068 Uiso 1 1 calc R . .
O_213 O 0.2647(5) 0.1715(5) -0.4497(4) 0.046(3) Uani 1 1 d . D .
C_213 C 0.2505(8) 0.2339(7) -0.4595(7) 0.049(5) Uani 1 1 d . D .
H0_213 H 0.2148 0.2347 -0.4914 0.058 Uiso 1 1 calc R . .
C1_213 C 0.2287(9) 0.2603(8) -0.4197(7) 0.060(6) Uiso 1 1 d . . .
H1A_213 H 0.1973 0.2346 -0.4140 0.072 Uiso 1 1 calc R D .
H1B_213 H 0.2117 0.3000 -0.4308 0.072 Uiso 1 1 calc R . .
H1C_213 H 0.2625 0.2640 -0.3878 0.072 Uiso 1 1 calc R . .
C2_213 C 0.2989(9) 0.2653(8) -0.4732(7) 0.058(5) Uiso 1 1 d . . .
H2A_213 H 0.3112 0.2414 -0.4982 0.069 Uiso 1 1 calc R D .
H2B_213 H 0.3338 0.2711 -0.4424 0.069 Uiso 1 1 calc R . .
H2C_213 H 0.2840 0.3042 -0.4882 0.069 Uiso 1 1 calc R . .
C_14 C 0.5532(9) 0.2965(9) -0.2691(7) 0.063(6) Uiso 1 1 d . . .
H0_14 H 0.5458 0.3405 -0.2742 0.076 Uiso 1 1 calc R . .
O_14 O 0.5050(6) 0.2735(5) -0.2550(5) 0.056(3) Uiso 1 1 d . . .
C1_14 C 0.6151(11) 0.2894(10) -0.2249(9) 0.093(8) Uiso 1 1 d . . .
H1A_14 H 0.6116 0.3069 -0.1932 0.112 Uiso 1 1 calc R . .
H1B_14 H 0.6472 0.3099 -0.2345 0.112 Uiso 1 1 calc R . .
H1C_14 H 0.6251 0.2468 -0.2194 0.112 Uiso 1 1 calc R . .
C2_14 C 0.5555(10) 0.2718(8) -0.3200(7) 0.064(6) Uiso 1 1 d . . .
H2A_14 H 0.5663 0.2294 -0.3161 0.077 Uiso 1 1 calc R . .
H2B_14 H 0.5858 0.2938 -0.3309 0.077 Uiso 1 1 calc R . .
H2C_14 H 0.5156 0.2764 -0.3460 0.077 Uiso 1 1 calc R . .
C_15 C 0.5103(11) 0.2845(10) 0.2077(10) 0.087(7) Uiso 1 1 d . . .
H0_15 H 0.4911 0.2887 0.1698 0.104 Uiso 1 1 calc R . .
O_15 O 0.4669(6) 0.2623(6) 0.2285(5) 0.069(4) Uiso 1 1 d . . .
C1_15 C 0.5343(15) 0.3465(13) 0.2297(12) 0.139(12) Uiso 1 1 d . . .
H1A_15 H 0.5002 0.3743 0.2238 0.167 Uiso 1 1 calc R . .
H1B_15 H 0.5627 0.3614 0.2128 0.167 Uiso 1 1 calc R . .
H1C_15 H 0.5550 0.3429 0.2667 0.167 Uiso 1 1 calc R . .
C2_15 C 0.5622(16) 0.2407(14) 0.2173(13) 0.156(13) Uiso 1 1 d . . .
H2A_15 H 0.5758 0.2291 0.2536 0.188 Uiso 1 1 calc R . .
H2B_15 H 0.5958 0.2594 0.2086 0.188 Uiso 1 1 calc R . .
H2C_15 H 0.5486 0.2051 0.1960 0.188 Uiso 1 1 calc R . .
C_214 C -0.0456(9) 0.1840(8) -0.6602(7) 0.057(5) Uiso 1 1 d . . .
H0_214 H -0.0664 0.1491 -0.6810 0.068 Uiso 1 1 calc R . .
O_214 O 0.0134(6) 0.1887(5) -0.6663(4) 0.054(3) Uiso 1 1 d . . .
C1_214 C -0.0854(10) 0.2404(8) -0.6811(8) 0.070(6) Uiso 1 1 d . . .
H1A_214 H -0.0703 0.2742 -0.6578 0.084 Uiso 1 1 calc R . .
H1B_214 H -0.1275 0.2321 -0.6833 0.084 Uiso 1 1 calc R . .
H1C_214 H -0.0832 0.2504 -0.7152 0.084 Uiso 1 1 calc R . .
C2_214 C -0.0412(10) 0.1712(9) -0.6040(8) 0.075(6) Uiso 1 1 d . . .
H2A_214 H -0.0145 0.1369 -0.5914 0.090 Uiso 1 1 calc R . .
H2B_214 H -0.0817 0.1622 -0.6020 0.090 Uiso 1 1 calc R . .
H2C_214 H -0.0248 0.2063 -0.5829 0.090 Uiso 1 1 calc R . .
C_215 C -0.0686(14) 0.2177(13) -0.1647(11) 0.114(9) Uiso 1 1 d . . .
H0_215 H -0.0960 0.1857 -0.1848 0.136 Uiso 1 1 calc R . .
O_215 O -0.0102(6) 0.2151(6) -0.1757(5) 0.068(4) Uiso 1 1 d . . .
C1_215 C -0.091(2) 0.273(2) -0.1846(19) 0.25(2) Uiso 1 1 d . . .
H1A_215 H -0.0767 0.3035 -0.1581 0.304 Uiso 1 1 calc R . .
H1B_215 H -0.1355 0.2717 -0.1960 0.304 Uiso 1 1 calc R . .
H1C_215 H -0.0769 0.2822 -0.2138 0.304 Uiso 1 1 calc R . .
C2_215 C -0.0562(14) 0.2059(12) -0.1099(10) 0.121(10) Uiso 1 1 d . . .
H2A_215 H -0.0240 0.2326 -0.0900 0.145 Uiso 1 1 calc R . .
H2B_215 H -0.0432 0.1643 -0.1026 0.145 Uiso 1 1 calc R . .
H2C_215 H -0.0930 0.2129 -0.1006 0.145 Uiso 1 1 calc R . .

loop_
 _atom_site_aniso_label
 _atom_site_aniso_U_11
 _atom_site_aniso_U_22
 _atom_site_aniso_U_33
 _atom_site_aniso_U_23
 _atom_site_aniso_U_13
 _atom_site_aniso_U_12
Eu1 0.0460(6) 0.0455(6) 0.0429(6) 0.0029(4) 0.0036(5) 0.0000(5)
Eu2 0.0568(7) 0.0453(6) 0.0424(6) 0.0001(5) 0.0021(5) -0.0090(5)
Eu3 0.0452(6) 0.0386(5) 0.0438(6) 0.0034(4) 0.0078(5) -0.0025(5)
Eu4 0.0436(7) 0.0568(6) 0.0422(6) 0.0021(5) 0.0079(5) -0.0053(5)
O_1 0.069(9) 0.030(7) 0.055(8) 0.013(6) 0.006(7) 0.008(6)
C_1 0.094(18) 0.036(12) 0.062(13) 0.013(10) 0.018(13) 0.014(11)
O_2 0.070(10) 0.070(9) 0.058(9) 0.002(7) -0.017(8) -0.020(8)
O_3 0.090(11) 0.068(9) 0.037(8) 0.004(7) -0.038(8) 0.000(8)
C_3 0.13(3) 0.23(4) 0.07(2) -0.04(2) -0.01(2) -0.05(3)
O_4 0.132(15) 0.036(8) 0.077(11) -0.008(7) -0.006(10) -0.009(9)
C_4 0.32(6) 0.20(4) 0.041(17) -0.04(2) 0.03(3) -0.05(4)
O_5 0.080(11) 0.040(7) 0.079(9) -0.005(7) 0.020(8) -0.027(7)
O_6 0.070(10) 0.089(10) 0.071(9) -0.009(8) 0.052(8) -0.001(8)
O_7 0.023(7) 0.065(8) 0.059(8) 0.019(6) 0.011(6) 0.020(6)
O_8 0.036(8) 0.064(8) 0.055(8) 0.010(6) 0.006(6) 0.006(6)
C_8 0.063(16) 0.109(19) 0.069(16) 0.044(14) 0.014(13) 0.030(14)
O_9 0.056(9) 0.076(9) 0.037(7) 0.006(6) 0.005(6) -0.034(8)
C_9 0.059(15) 0.091(16) 0.059(14) 0.004(12) 0.015(12) -0.025(13)
O_10 0.079(10) 0.049(7) 0.038(7) -0.002(6) 0.025(7) -0.002(7)
O_11 0.052(8) 0.045(7) 0.031(6) 0.012(5) 0.004(6) -0.007(6)
C_11 0.040(12) 0.058(12) 0.050(12) 0.022(10) 0.013(10) 0.008(10)
O_12 0.028(7) 0.046(7) 0.046(7) -0.013(6) 0.008(6) -0.010(6)
C_12 0.049(13) 0.041(11) 0.056(12) -0.005(10) 0.019(10) 0.008(9)
O_13 0.058(8) 0.026(6) 0.057(8) 0.002(5) 0.018(7) 0.001(6)
C_13 0.041(13) 0.047(12) 0.066(14) 0.002(10) -0.003(11) 0.003(10)
Eu1_20 0.0464(6) 0.0422(6) 0.0452(6) -0.0004(4) 0.0047(5) -0.0023(5)
Eu2_20 0.0438(6) 0.0452(6) 0.0433(6) 0.0007(4) 0.0041(5) 0.0039(5)
Eu3_20 0.0419(6) 0.0456(6) 0.0419(6) 0.0026(4) 0.0081(5) -0.0015(5)
Eu4_20 0.0435(6) 0.0501(6) 0.0438(6) -0.0003(5) 0.0093(5) 0.0065(5)
O_21 0.047(8) 0.048(8) 0.048(7) -0.009(6) 0.003(6) -0.011(6)
C_21 0.063(14) 0.055(13) 0.051(12) 0.002(10) 0.018(11) 0.026(11)
O_22 0.054(9) 0.061(8) 0.054(8) 0.012(7) -0.008(7) 0.014(7)
C_22 0.072(17) 0.086(17) 0.064(15) 0.028(13) -0.002(13) -0.005(14)
O_23 0.061(9) 0.037(7) 0.043(7) -0.011(6) 0.002(6) -0.005(6)
C_23 0.061(15) 0.060(14) 0.082(16) 0.013(12) 0.030(13) 0.024(11)
O_24 0.050(9) 0.037(7) 0.072(9) 0.004(6) 0.018(7) 0.017(6)
C_24 0.064(17) 0.12(2) 0.066(16) -0.004(14) -0.015(13) -0.021(16)
O_25 0.076(10) 0.054(8) 0.080(10) 0.040(7) 0.016(8) -0.019(7)
C_25 0.11(2) 0.075(17) 0.12(2) 0.037(16) 0.025(19) 0.008(16)
O_26 0.063(10) 0.059(8) 0.074(9) -0.011(7) 0.010(8) 0.020(7)
C_26 0.060(17) 0.10(2) 0.12(2) -0.013(17) 0.010(16) 0.020(15)
O_27 0.062(9) 0.059(8) 0.028(7) -0.008(6) 0.026(6) 0.002(6)
C_27 0.14(2) 0.047(13) 0.056(14) -0.001(10) 0.027(15) 0.022(13)
O_28 0.053(9) 0.053(7) 0.040(7) 0.005(6) 0.011(6) -0.011(6)
C_28 0.049(14) 0.095(16) 0.060(14) 0.019(12) 0.026(11) -0.047(13)
O_29 0.061(9) 0.055(8) 0.032(7) 0.015(6) 0.000(6) 0.013(7)
O_210 0.040(8) 0.058(8) 0.041(7) 0.008(6) 0.009(6) 0.007(6)
C_210 0.075(17) 0.087(16) 0.031(11) 0.002(10) 0.014(11) 0.024(13)
O_211 0.031(7) 0.033(6) 0.045(7) 0.003(5) 0.004(6) -0.008(5)
O_212 0.040(8) 0.050(7) 0.036(7) -0.005(6) 0.010(6) 0.005(6)
C_212 0.066(14) 0.033(11) 0.040(11) -0.014(9) 0.013(10) -0.010(10)
O_213 0.047(8) 0.040(7) 0.053(7) 0.013(6) 0.020(6) 0.004(6)
C_213 0.041(12) 0.044(11) 0.043(11) 0.016(9) -0.013(10) 0.001(9)

_geom_special_details
;
 All esds (except the esd in the dihedral angle between two l.s. planes)
 are estimated using the full covariance matrix.  The cell esds are taken
 into account individually in the estimation of esds in distances, angles
 and torsion angles; correlations between esds in cell parameters are only
 used when they are defined by crystal symmetry.  An approximate (isotropic)
 treatment of cell esds is used for estimating esds involving l.s. planes.
;

loop_
 _geom_bond_atom_site_label_1
 _geom_bond_atom_site_label_2
 _geom_bond_distance
 _geom_bond_site_symmetry_2
 _geom_bond_publ_flag
Eu1 O_7 2.452(12) . ?
Eu1 O_8 2.464(12) . ?
Eu1 O_12 2.538(11) . ?
Eu1 O_2 2.569(12) . ?
Eu1 O_1 2.595(10) . ?
Eu1 O_13 2.813(11) . ?
Eu1 C_13 3.128(18) . ?
Eu1 Eu4 3.6248(16) . ?
Eu1 Eu3 3.6263(15) . ?
Eu2 O_9 2.450(12) . ?
Eu2 O_3 2.500(12) . ?
Eu2 O_10 2.503(13) . ?
Eu2 O_4 2.554(13) . ?
Eu2 O_11 2.595(11) . ?
Eu2 O_13 2.801(11) . ?
Eu2 C_11 3.133(19) . ?
Eu2 Eu4 3.6404(15) . ?
Eu2 Eu3 3.6530(15) . ?
Eu3 O_5 2.103(11) . ?
Eu3 O_7 2.282(10) . ?
Eu3 O_10 2.297(11) . ?
Eu3 O_11 2.369(12) . ?
Eu3 O_12 2.466(11) . ?
Eu3 O_13 2.496(10) . ?
Eu3 Eu4 3.6316(16) . ?
Eu4 O_6 2.100(13) . ?
Eu4 O_9 2.270(11) . ?
Eu4 O_8 2.283(11) . ?
Eu4 O_11 2.408(10) . ?
Eu4 O_12 2.428(10) . ?
Eu4 O_13 2.493(12) . ?
O_1 C_1 1.45(2) . ?
C_1 C1_1 1.47(3) . ?
C_1 C2_1 1.50(3) . ?
O_2 CB_2 1.53(4) . ?
O_2 CA_2 1.57(5) . ?
CA_2 C2A_2 1.42(6) . ?
CA_2 C1A_2 1.61(9) . ?
CB_2 C2B_2 1.48(5) . ?
CB_2 C1B_2 1.58(5) . ?
O_3 C_3 1.47(4) . ?
C_3 C2_3 1.41(5) . ?
C_3 C1_3 1.44(4) . ?
O_4 C_4 1.46(4) . ?
C_4 C2_4 1.41(4) . ?
C_4 C1_4 1.54(5) . ?
O_5 CB_5 1.436(19) . ?
O_5 CA_5 1.449(19) . ?
CA_5 C2A_5 1.517(19) . ?
CA_5 C1A_5 1.530(19) . ?
CB_5 C2B_5 1.52(2) . ?
CB_5 C1B_5 1.53(2) . ?
O_6 CA_6 1.414(19) . ?
O_6 CB_6 1.43(2) . ?
CA_6 C1A_6 1.508(19) . ?
CA_6 C2A_6 1.517(19) . ?
CB_6 C1B_6 1.52(2) . ?
CB_6 C2B_6 1.53(2) . ?
O_7 CA_7 1.38(8) . ?
O_7 CB_7 1.51(10) . ?
CA_7 C1A_7 1.49(9) . ?
CA_7 C2A_7 1.59(8) . ?
CB_7 C1B_7 1.41(11) . ?
CB_7 C2B_7 1.50(9) . ?
O_8 C_8 1.48(2) . ?
C_8 C1_8 1.50(3) . ?
C_8 C2_8 1.55(3) . ?
O_9 C_9 1.47(2) . ?
C_9 C2_9 1.44(3) . ?
C_9 C1_9 1.47(3) . ?
O_10 CA_10 1.422(18) . ?
O_10 CB_10 1.423(19) . ?
CA_10 C2A_10 1.523(19) . ?
CA_10 C1A_10 1.524(19) . ?
CB_10 C2B_10 1.53(2) . ?
CB_10 C1B_10 1.53(2) . ?
O_11 C_11 1.481(19) . ?
C_11 C2_11 1.41(3) . ?
C_11 C1_11 1.52(2) . ?
O_12 C_12 1.416(19) . ?
C_12 C1_12 1.46(2) . ?
C_12 C2_12 1.54(3) . ?
O_13 C_13 1.46(2) . ?
C_13 C1_13 1.45(3) . ?
C_13 C2_13 1.56(3) . ?
Eu1_20 O_27 2.456(12) . ?
Eu1_20 O_28 2.470(12) . ?
Eu1_20 O_211 2.581(10) . ?
Eu1_20 O_22 2.604(11) . ?
Eu1_20 O_21 2.610(10) . ?
Eu1_20 O_213 2.772(11) . ?
Eu1_20 CA_211 3.05(4) . ?
Eu1_20 Eu3_20 3.6389(15) . ?
Eu1_20 Eu4_20 3.6502(15) . ?
Eu2_20 O_29 2.463(13) . ?
Eu2_20 O_210 2.463(12) . ?
Eu2_20 O_23 2.554(10) . ?
Eu2_20 O_24 2.560(11) . ?
Eu2_20 O_212 2.575(10) . ?
Eu2_20 O_213 2.917(11) . ?
Eu2_20 CB_29 3.14(3) . ?
Eu2_20 C_213 3.221(17) . ?
Eu2_20 Eu3_20 3.6445(15) . ?
Eu2_20 Eu4_20 3.6520(16) . ?
Eu3_20 O_25 2.119(12) . ?
Eu3_20 O_27 2.275(11) . ?
Eu3_20 O_210 2.290(11) . ?
Eu3_20 O_212 2.427(11) . ?
Eu3_20 O_211 2.452(11) . ?
Eu3_20 O_213 2.480(11) . ?
Eu3_20 Eu4_20 3.6366(16) . ?
Eu4_20 O_26 2.094(13) . ?
Eu4_20 O_29 2.287(10) . ?
Eu4_20 O_28 2.299(11) . ?
Eu4_20 O_211 2.428(10) . ?
Eu4_20 O_212 2.443(11) . ?
Eu4_20 O_213 2.498(11) . ?
O_21 C_21 1.437(19) . ?
C_21 C2_21 1.49(3) . ?
C_21 C1_21 1.50(3) . ?
O_22 C_22 1.46(2) . ?
C_22 C1_22 1.44(3) . ?
C_22 C2_22 1.44(3) . ?
O_23 C_23 1.44(2) . ?
C_23 C2_23 1.47(3) . ?
C_23 C1_23 1.54(3) . ?
O_24 C_24 1.45(3) . ?
C_24 C1_24 1.45(3) . ?
C_24 C2_24 1.51(3) . ?
O_25 C_25 1.38(3) . ?
C_25 C1_25 1.47(3) . ?
C_25 C2_25 1.55(4) . ?
O_26 C_26 1.45(3) . ?
C_26 C1_26 1.58(3) . ?
C_26 C2_26 1.59(4) . ?
O_27 C_27 1.41(2) . ?
C_27 C1_27 1.45(3) . ?
C_27 C2_27 1.47(3) . ?
O_28 C_28 1.42(2) . ?
C_28 C1_28 1.46(3) . ?
C_28 C2_28 1.48(3) . ?
O_29 CB_29 1.421(19) . ?
O_29 CA_29 1.437(19) . ?
CA_29 C2A_29 1.50(2) . ?
CA_29 C1A_29 1.528(19) . ?
CB_29 C2B_29 1.52(2) . ?
CB_29 C1B_29 1.53(2) . ?
O_210 C_210 1.42(2) . ?
C_210 C1_210 1.47(3) . ?
C_210 C2_210 1.54(3) . ?
O_211 CA_211 1.438(18) . ?
O_211 CB_211 1.446(17) . ?
CA_211 C1A_211 1.52(2) . ?
CA_211 C2A_211 1.524(19) . ?
CB_211 C2B_211 1.517(18) . ?
CB_211 C1B_211 1.522(19) . ?
O_212 C_212 1.442(18) . ?
C_212 C1_212 1.48(3) . ?
C_212 C2_212 1.53(3) . ?
O_213 C_213 1.440(19) . ?
C_213 C1_213 1.47(3) . ?
C_213 C2_213 1.47(3) . ?
C_14 O_14 1.40(2) . ?
C_14 C2_14 1.52(3) . ?
C_14 C1_14 1.57(3) . ?
C_15 O_15 1.40(3) . ?
C_15 C2_15 1.51(4) . ?
C_15 C1_15 1.54(3) . ?
C_214 O_214 1.44(2) . ?
C_214 C2_214 1.54(3) . ?
C_214 C1_214 1.56(3) . ?
C_215 C1_215 1.38(5) . ?
C_215 C2_215 1.46(3) . ?
C_215 O_215 1.48(3) . ?

loop_
 _geom_angle_atom_site_label_1
 _geom_angle_atom_site_label_2
 _geom_angle_atom_site_label_3
 _geom_angle
 _geom_angle_site_symmetry_1
 _geom_angle_site_symmetry_3
 _geom_angle_publ_flag
O_7 Eu1 O_8 134.1(4) . . ?
O_7 Eu1 O_12 75.9(4) . . ?
O_8 Eu1 O_12 74.0(4) . . ?
O_7 Eu1 O_2 100.3(4) . . ?
O_8 Eu1 O_2 122.9(4) . . ?
O_12 Eu1 O_2 112.3(4) . . ?
O_7 Eu1 O_1 112.2(4) . . ?
O_8 Eu1 O_1 95.3(4) . . ?
O_12 Eu1 O_1 169.3(4) . . ?
O_2 Eu1 O_1 74.1(4) . . ?
O_7 Eu1 O_13 67.3(4) . . ?
O_8 Eu1 O_13 68.7(4) . . ?
O_12 Eu1 O_13 64.2(3) . . ?
O_2 Eu1 O_13 167.4(4) . . ?
O_1 Eu1 O_13 111.5(3) . . ?
O_7 Eu1 C_13 71.2(5) . . ?
O_8 Eu1 C_13 76.1(5) . . ?
O_12 Eu1 C_13 92.1(4) . . ?
O_2 Eu1 C_13 151.9(5) . . ?
O_1 Eu1 C_13 84.3(4) . . ?
O_13 Eu1 C_13 27.9(4) . . ?
O_7 Eu1 Eu4 97.7(2) . . ?
O_8 Eu1 Eu4 38.4(3) . . ?
O_12 Eu1 Eu4 42.0(2) . . ?
O_2 Eu1 Eu4 142.3(4) . . ?
O_1 Eu1 Eu4 127.9(3) . . ?
O_13 Eu1 Eu4 43.3(2) . . ?
C_13 Eu1 Eu4 65.8(4) . . ?
O_7 Eu1 Eu3 38.3(2) . . ?
O_8 Eu1 Eu3 98.2(3) . . ?
O_12 Eu1 Eu3 42.8(2) . . ?
O_2 Eu1 Eu3 125.4(3) . . ?
O_1 Eu1 Eu3 141.1(3) . . ?
O_13 Eu1 Eu3 43.4(2) . . ?
C_13 Eu1 Eu3 64.1(3) . . ?
Eu4 Eu1 Eu3 60.11(3) . . ?
O_9 Eu2 O_3 104.3(5) . . ?
O_9 Eu2 O_10 135.9(4) . . ?
O_3 Eu2 O_10 108.8(4) . . ?
O_9 Eu2 O_4 98.1(5) . . ?
O_3 Eu2 O_4 74.2(4) . . ?
O_10 Eu2 O_4 118.2(5) . . ?
O_9 Eu2 O_11 71.2(4) . . ?
O_3 Eu2 O_11 109.9(4) . . ?
O_10 Eu2 O_11 70.6(4) . . ?
O_4 Eu2 O_11 169.2(4) . . ?
O_9 Eu2 O_13 71.4(4) . . ?
O_3 Eu2 O_13 171.4(4) . . ?
O_10 Eu2 O_13 71.6(3) . . ?
O_4 Eu2 O_13 113.5(4) . . ?
O_11 Eu2 O_13 61.8(3) . . ?
O_9 Eu2 C_11 77.6(4) . . ?
O_3 Eu2 C_11 81.9(4) . . ?
O_10 Eu2 C_11 79.1(4) . . ?
O_4 Eu2 C_11 153.9(5) . . ?
O_11 Eu2 C_11 28.0(4) . . ?
O_13 Eu2 C_11 89.8(4) . . ?
O_9 Eu2 Eu4 37.8(3) . . ?
O_3 Eu2 Eu4 129.3(4) . . ?
O_10 Eu2 Eu4 98.1(3) . . ?
O_4 Eu2 Eu4 128.2(3) . . ?
O_11 Eu2 Eu4 41.3(2) . . ?
O_13 Eu2 Eu4 43.1(2) . . ?
C_11 Eu2 Eu4 61.7(3) . . ?
O_9 Eu2 Eu3 97.5(3) . . ?
O_3 Eu2 Eu3 132.5(3) . . ?
O_10 Eu2 Eu3 38.4(2) . . ?
O_4 Eu2 Eu3 143.4(4) . . ?
O_11 Eu2 Eu3 40.3(3) . . ?
O_13 Eu2 Eu3 43.0(2) . . ?
C_11 Eu2 Eu3 62.2(3) . . ?
Eu4 Eu2 Eu3 59.73(3) . . ?
O_5 Eu3 O_7 103.4(5) . . ?
O_5 Eu3 O_10 106.6(5) . . ?
O_7 Eu3 O_10 112.7(4) . . ?
O_5 Eu3 O_11 108.7(5) . . ?
O_7 Eu3 O_11 141.2(4) . . ?
O_10 Eu3 O_11 78.3(4) . . ?
O_5 Eu3 O_12 101.9(4) . . ?
O_7 Eu3 O_12 80.4(4) . . ?
O_10 Eu3 O_12 144.2(4) . . ?
O_11 Eu3 O_12 72.3(3) . . ?
O_5 Eu3 O_13 172.1(5) . . ?
O_7 Eu3 O_13 75.6(4) . . ?
O_10 Eu3 O_13 80.8(4) . . ?
O_11 Eu3 O_13 69.6(4) . . ?
O_12 Eu3 O_13 70.2(4) . . ?
O_5 Eu3 Eu1 123.6(4) . . ?
O_7 Eu3 Eu1 41.8(3) . . ?
O_10 Eu3 Eu1 126.2(3) . . ?
O_11 Eu3 Eu1 100.8(2) . . ?
O_12 Eu3 Eu1 44.3(3) . . ?
O_13 Eu3 Eu1 50.7(3) . . ?
O_5 Eu3 Eu4 130.5(4) . . ?
O_7 Eu3 Eu4 100.9(3) . . ?
O_10 Eu3 Eu4 102.5(3) . . ?
O_11 Eu3 Eu4 40.9(2) . . ?
O_12 Eu3 Eu4 41.7(2) . . ?
O_13 Eu3 Eu4 43.3(3) . . ?
Eu1 Eu3 Eu4 59.92(3) . . ?
O_5 Eu3 Eu2 134.4(4) . . ?
O_7 Eu3 Eu2 118.6(3) . . ?
O_10 Eu3 Eu2 42.6(3) . . ?
O_11 Eu3 Eu2 45.1(3) . . ?
O_12 Eu3 Eu2 101.7(2) . . ?
O_13 Eu3 Eu2 50.0(3) . . ?
Eu1 Eu3 Eu2 100.35(4) . . ?
Eu4 Eu3 Eu2 59.96(3) . . ?
O_6 Eu4 O_9 105.3(5) . . ?
O_6 Eu4 O_8 99.9(5) . . ?
O_9 Eu4 O_8 115.2(4) . . ?
O_6 Eu4 O_11 111.7(5) . . ?
O_9 Eu4 O_11 77.8(4) . . ?
O_8 Eu4 O_11 141.4(4) . . ?
O_6 Eu4 O_12 103.8(5) . . ?
O_9 Eu4 O_12 144.2(4) . . ?
O_8 Eu4 O_12 79.3(4) . . ?
O_11 Eu4 O_12 72.3(4) . . ?
O_6 Eu4 O_13 174.4(5) . . ?
O_9 Eu4 O_13 80.4(4) . . ?
O_8 Eu4 O_13 77.4(4) . . ?
O_11 Eu4 O_13 69.0(4) . . ?
O_12 Eu4 O_13 70.9(4) . . ?
O_6 Eu4 Eu1 124.2(4) . . ?
O_9 Eu4 Eu1 126.1(4) . . ?
O_8 Eu4 Eu1 42.1(3) . . ?
O_11 Eu4 Eu1 100.1(3) . . ?
O_12 Eu4 Eu1 44.3(3) . . ?
O_13 Eu4 Eu1 50.7(3) . . ?
O_6 Eu4 Eu3 133.7(4) . . ?
O_9 Eu4 Eu3 101.7(3) . . ?
O_8 Eu4 Eu3 101.7(3) . . ?
O_11 Eu4 Eu3 40.1(3) . . ?
O_12 Eu4 Eu3 42.5(3) . . ?
O_13 Eu4 Eu3 43.3(2) . . ?
Eu1 Eu4 Eu3 59.96(3) . . ?
O_6 Eu4 Eu2 134.4(4) . . ?
O_9 Eu4 Eu2 41.4(3) . . ?
O_8 Eu4 Eu2 120.9(3) . . ?
O_11 Eu4 Eu2 45.4(3) . . ?
O_12 Eu4 Eu2 102.8(3) . . ?
O_13 Eu4 Eu2 50.2(3) . . ?
Eu1 Eu4 Eu2 100.62(4) . . ?
Eu3 Eu4 Eu2 60.31(3) . . ?
C_1 O_1 Eu1 127.3(11) . . ?
O_1 C_1 C1_1 110.4(19) . . ?
O_1 C_1 C2_1 111.6(16) . . ?
C1_1 C_1 C2_1 114.2(18) . . ?
CB_2 O_2 CA_2 45(2) . . ?
CB_2 O_2 Eu1 126.4(15) . . ?
CA_2 O_2 Eu1 123(2) . . ?
C2A_2 CA_2 O_2 111(4) . . ?
C2A_2 CA_2 C1A_2 123(5) . . ?
O_2 CA_2 C1A_2 101(4) . . ?
C2B_2 CB_2 O_2 117(3) . . ?
C2B_2 CB_2 C1B_2 114(3) . . ?
O_2 CB_2 C1B_2 103(3) . . ?
C_3 O_3 Eu2 141.4(15) . . ?
C2_3 C_3 C1_3 114(4) . . ?
C2_3 C_3 O_3 112(3) . . ?
C1_3 C_3 O_3 112(3) . . ?
C_4 O_4 Eu2 137.9(17) . . ?
C2_4 C_4 O_4 110(3) . . ?
C2_4 C_4 C1_4 116(4) . . ?
O_4 C_4 C1_4 109(4) . . ?
CB_5 O_5 CA_5 32(3) . . ?
CB_5 O_5 Eu3 166(3) . . ?
CA_5 O_5 Eu3 161(3) . . ?
O_5 CA_5 C2A_5 109(3) . . ?
O_5 CA_5 C1A_5 108(2) . . ?
C2A_5 CA_5 C1A_5 127(4) . . ?
O_5 CB_5 C2B_5 112(4) . . ?
O_5 CB_5 C1B_5 105(4) . . ?
C2B_5 CB_5 C1B_5 118(5) . . ?
CA_6 O_6 CB_6 16(4) . . ?
CA_6 O_6 Eu4 170.3(19) . . ?
CB_6 O_6 Eu4 172(3) . . ?
O_6 CA_6 C1A_6 122(3) . . ?
O_6 CA_6 C2A_6 112(3) . . ?
C1A_6 CA_6 C2A_6 126(3) . . ?
O_6 CB_6 C1B_6 111(6) . . ?
O_6 CB_6 C2B_6 88(5) . . ?
C1B_6 CB_6 C2B_6 103.3(18) . . ?
CA_7 O_7 CB_7 12(5) . . ?
CA_7 O_7 Eu3 135(3) . . ?
CB_7 O_7 Eu3 132(3) . . ?
CA_7 O_7 Eu1 125(3) . . ?
CB_7 O_7 Eu1 125(3) . . ?
Eu3 O_7 Eu1 99.9(4) . . ?
O_7 CA_7 C1A_7 120(5) . . ?
O_7 CA_7 C2A_7 110(5) . . ?
C1A_7 CA_7 C2A_7 108(6) . . ?
C1B_7 CB_7 C2B_7 140(8) . . ?
C1B_7 CB_7 O_7 110(5) . . ?
C2B_7 CB_7 O_7 109(6) . . ?
C_8 O_8 Eu4 127.1(11) . . ?
C_8 O_8 Eu1 126.1(11) . . ?
Eu4 O_8 Eu1 99.5(5) . . ?
O_8 C_8 C1_8 108.7(19) . . ?
O_8 C_8 C2_8 108.0(18) . . ?
C1_8 C_8 C2_8 114.6(17) . . ?
C_9 O_9 Eu4 135.5(12) . . ?
C_9 O_9 Eu2 123.6(11) . . ?
Eu4 O_9 Eu2 100.9(4) . . ?
C2_9 C_9 O_9 110.8(17) . . ?
C2_9 C_9 C1_9 114(2) . . ?
O_9 C_9 C1_9 108.0(18) . . ?
CA_10 O_10 CB_10 27(2) . . ?
CA_10 O_10 Eu3 132.3(15) . . ?
CB_10 O_10 Eu3 128(2) . . ?
CA_10 O_10 Eu2 125.9(13) . . ?
CB_10 O_10 Eu2 130.9(19) . . ?
Eu3 O_10 Eu2 99.0(4) . . ?
O_10 CA_10 C2A_10 112(3) . . ?
O_10 CA_10 C1A_10 114(2) . . ?
C2A_10 CA_10 C1A_10 126(3) . . ?
O_10 CB_10 C2B_10 109(4) . . ?
O_10 CB_10 C1B_10 100(4) . . ?
C2B_10 CB_10 C1B_10 114(5) . . ?
C_11 O_11 Eu3 132.0(9) . . ?
C_11 O_11 Eu4 126.6(10) . . ?
Eu3 O_11 Eu4 99.0(4) . . ?
C_11 O_11 Eu2 96.6(9) . . ?
Eu3 O_11 Eu2 94.7(4) . . ?
Eu4 O_11 Eu2 93.3(3) . . ?
C2_11 C_11 O_11 113.1(15) . . ?
C2_11 C_11 C1_11 112.1(17) . . ?
O_11 C_11 C1_11 106.8(15) . . ?
C2_11 C_11 Eu2 132.4(13) . . ?
O_11 C_11 Eu2 55.4(7) . . ?
C1_11 C_11 Eu2 115.4(13) . . ?
C_12 O_12 Eu4 126.6(10) . . ?
C_12 O_12 Eu3 121.4(10) . . ?
Eu4 O_12 Eu3 95.8(3) . . ?
C_12 O_12 Eu1 118.5(9) . . ?
Eu4 O_12 Eu1 93.7(4) . . ?
Eu3 O_12 Eu1 92.9(4) . . ?
O_12 C_12 C1_12 112.5(15) . . ?
O_12 C_12 C2_12 107.4(14) . . ?
C1_12 C_12 C2_12 112.1(17) . . ?
C_13 O_13 Eu4 136.1(10) . . ?
C_13 O_13 Eu3 129.5(11) . . ?
Eu4 O_13 Eu3 93.4(3) . . ?
C_13 O_13 Eu2 102.4(9) . . ?
Eu4 O_13 Eu2 86.7(4) . . ?
Eu3 O_13 Eu2 87.0(3) . . ?
C_13 O_13 Eu1 88.1(9) . . ?
Eu4 O_13 Eu1 86.0(3) . . ?
Eu3 O_13 Eu1 85.9(3) . . ?
Eu2 O_13 Eu1 169.5(4) . . ?
C1_13 C_13 O_13 114.3(15) . . ?
C1_13 C_13 C2_13 115.0(16) . . ?
O_13 C_13 C2_13 107.4(15) . . ?
C1_13 C_13 Eu1 128.7(13) . . ?
O_13 C_13 Eu1 64.0(8) . . ?
C2_13 C_13 Eu1 113.5(12) . . ?
O_27 Eu1_20 O_28 135.9(4) . . ?
O_27 Eu1_20 O_211 72.8(4) . . ?
O_28 Eu1_20 O_211 71.9(3) . . ?
O_27 Eu1_20 O_22 112.6(4) . . ?
O_28 Eu1_20 O_22 103.8(4) . . ?
O_211 Eu1_20 O_22 109.8(3) . . ?
O_27 Eu1_20 O_21 107.0(4) . . ?
O_28 Eu1_20 O_21 106.5(4) . . ?
O_211 Eu1_20 O_21 176.4(3) . . ?
O_22 Eu1_20 O_21 73.7(4) . . ?
O_27 Eu1_20 O_213 69.9(3) . . ?
O_28 Eu1_20 O_213 71.0(4) . . ?
O_211 Eu1_20 O_213 63.4(3) . . ?
O_22 Eu1_20 O_213 172.2(4) . . ?
O_21 Eu1_20 O_213 113.0(3) . . ?
O_27 Eu1_20 CA_211 81.3(6) . . ?
O_28 Eu1_20 CA_211 80.0(6) . . ?
O_211 Eu1_20 CA_211 28.0(6) . . ?
O_22 Eu1_20 CA_211 81.9(6) . . ?
O_21 Eu1_20 CA_211 155.5(6) . . ?
O_213 Eu1_20 CA_211 91.4(6) . . ?
O_27 Eu1_20 Eu3_20 37.9(2) . . ?
O_28 Eu1_20 Eu3_20 98.2(3) . . ?
O_211 Eu1_20 Eu3_20 42.3(2) . . ?
O_22 Eu1_20 Eu3_20 134.9(3) . . ?
O_21 Eu1_20 Eu3_20 135.8(3) . . ?
O_213 Eu1_20 Eu3_20 42.9(2) . . ?
CA_211 Eu1_20 Eu3_20 63.7(5) . . ?
O_27 Eu1_20 Eu4_20 97.7(2) . . ?
O_28 Eu1_20 Eu4_20 38.4(3) . . ?
O_211 Eu1_20 Eu4_20 41.6(2) . . ?
O_22 Eu1_20 Eu4_20 129.4(3) . . ?
O_21 Eu1_20 Eu4_20 135.4(3) . . ?
O_213 Eu1_20 Eu4_20 43.1(2) . . ?
CA_211 Eu1_20 Eu4_20 63.2(6) . . ?
Eu3_20 Eu1_20 Eu4_20 59.86(3) . . ?
O_29 Eu2_20 O_210 133.7(4) . . ?
O_29 Eu2_20 O_23 103.9(4) . . ?
O_210 Eu2_20 O_23 117.5(4) . . ?
O_29 Eu2_20 O_24 106.8(4) . . ?
O_210 Eu2_20 O_24 104.4(4) . . ?
O_23 Eu2_20 O_24 73.0(4) . . ?
O_29 Eu2_20 O_212 74.8(3) . . ?
O_210 Eu2_20 O_212 73.5(4) . . ?
O_23 Eu2_20 O_212 108.1(3) . . ?
O_24 Eu2_20 O_212 177.9(4) . . ?
O_29 Eu2_20 O_213 67.1(3) . . ?
O_210 Eu2_20 O_213 68.7(3) . . ?
O_23 Eu2_20 O_213 168.1(4) . . ?
O_24 Eu2_20 O_213 116.4(3) . . ?
O_212 Eu2_20 O_213 62.8(3) . . ?
O_29 Eu2_20 CB_29 26.0(6) . . ?
O_210 Eu2_20 CB_29 159.6(7) . . ?
O_23 Eu2_20 CB_29 81.3(7) . . ?
O_24 Eu2_20 CB_29 88.1(6) . . ?
O_212 Eu2_20 CB_29 93.8(6) . . ?
O_213 Eu2_20 CB_29 91.5(7) . . ?
O_29 Eu2_20 C_213 72.1(4) . . ?
O_210 Eu2_20 C_213 74.7(4) . . ?
O_23 Eu2_20 C_213 160.7(4) . . ?
O_24 Eu2_20 C_213 89.9(4) . . ?
O_212 Eu2_20 C_213 89.4(4) . . ?
O_213 Eu2_20 C_213 26.6(3) . . ?
CB_29 Eu2_20 C_213 89.6(7) . . ?
O_29 Eu2_20 Eu3_20 97.1(2) . . ?
O_210 Eu2_20 Eu3_20 38.2(3) . . ?
O_23 Eu2_20 Eu3_20 135.7(3) . . ?
O_24 Eu2_20 Eu3_20 136.4(3) . . ?
O_212 Eu2_20 Eu3_20 41.7(2) . . ?
O_213 Eu2_20 Eu3_20 42.6(2) . . ?
CB_29 Eu2_20 Eu3_20 122.8(6) . . ?
C_213 Eu2_20 Eu3_20 63.3(3) . . ?
O_29 Eu2_20 Eu4_20 38.0(2) . . ?
O_210 Eu2_20 Eu4_20 97.7(3) . . ?
O_23 Eu2_20 Eu4_20 125.3(3) . . ?
O_24 Eu2_20 Eu4_20 139.0(3) . . ?
O_212 Eu2_20 Eu4_20 41.9(3) . . ?
O_213 Eu2_20 Eu4_20 42.9(2) . . ?
CB_29 Eu2_20 Eu4_20 63.0(6) . . ?
C_213 Eu2_20 Eu4_20 63.2(3) . . ?
Eu3_20 Eu2_20 Eu4_20 59.79(3) . . ?
O_25 Eu3_20 O_27 103.1(5) . . ?
O_25 Eu3_20 O_210 101.9(5) . . ?
O_27 Eu3_20 O_210 115.4(4) . . ?
O_25 Eu3_20 O_212 106.0(5) . . ?
O_27 Eu3_20 O_212 143.6(4) . . ?
O_210 Eu3_20 O_212 79.4(4) . . ?
O_25 Eu3_20 O_211 108.1(5) . . ?
O_27 Eu3_20 O_211 78.4(4) . . ?
O_210 Eu3_20 O_211 143.1(4) . . ?
O_212 Eu3_20 O_211 72.1(4) . . ?
O_25 Eu3_20 O_213 177.1(5) . . ?
O_27 Eu3_20 O_213 78.3(4) . . ?
O_210 Eu3_20 O_213 79.6(4) . . ?
O_212 Eu3_20 O_213 71.8(4) . . ?
O_211 Eu3_20 O_213 69.7(3) . . ?
O_25 Eu3_20 Eu4_20 133.8(4) . . ?
O_27 Eu3_20 Eu4_20 101.7(3) . . ?
O_210 Eu3_20 Eu4_20 101.6(3) . . ?
O_212 Eu3_20 Eu4_20 41.9(3) . . ?
O_211 Eu3_20 Eu4_20 41.6(2) . . ?
O_213 Eu3_20 Eu4_20 43.3(3) . . ?
O_25 Eu3_20 Eu1_20 130.2(4) . . ?
O_27 Eu3_20 Eu1_20 41.6(3) . . ?
O_210 Eu3_20 Eu1_20 123.4(3) . . ?
O_212 Eu3_20 Eu1_20 102.1(3) . . ?
O_211 Eu3_20 Eu1_20 45.1(2) . . ?
O_213 Eu3_20 Eu1_20 49.6(3) . . ?
Eu4_20 Eu3_20 Eu1_20 60.23(3) . . ?
O_25 Eu3_20 Eu2_20 126.9(4) . . ?
O_27 Eu3_20 Eu2_20 125.6(3) . . ?
O_210 Eu3_20 Eu2_20 41.7(3) . . ?
O_212 Eu3_20 Eu2_20 44.8(2) . . ?
O_211 Eu3_20 Eu2_20 101.8(2) . . ?
O_213 Eu3_20 Eu2_20 52.8(3) . . ?
Eu4_20 Eu3_20 Eu2_20 60.21(3) . . ?
Eu1_20 Eu3_20 Eu2_20 101.97(4) . . ?
O_26 Eu4_20 O_29 101.7(5) . . ?
O_26 Eu4_20 O_28 106.0(5) . . ?
O_29 Eu4_20 O_28 113.7(4) . . ?
O_26 Eu4_20 O_211 109.3(4) . . ?
O_29 Eu4_20 O_211 142.5(4) . . ?
O_28 Eu4_20 O_211 77.7(4) . . ?
O_26 Eu4_20 O_212 103.6(5) . . ?
O_29 Eu4_20 O_212 80.6(4) . . ?
O_28 Eu4_20 O_212 143.2(4) . . ?
O_211 Eu4_20 O_212 72.2(3) . . ?
O_26 Eu4_20 O_213 174.8(5) . . ?
O_29 Eu4_20 O_213 77.5(4) . . ?
O_28 Eu4_20 O_213 79.0(4) . . ?
O_211 Eu4_20 O_213 69.7(3) . . ?
O_212 Eu4_20 O_213 71.2(4) . . ?
O_26 Eu4_20 Eu3_20 133.0(4) . . ?
O_29 Eu4_20 Eu3_20 100.8(3) . . ?
O_28 Eu4_20 Eu3_20 101.7(3) . . ?
O_211 Eu4_20 Eu3_20 42.1(2) . . ?
O_212 Eu4_20 Eu3_20 41.5(2) . . ?
O_213 Eu4_20 Eu3_20 42.9(2) . . ?
O_26 Eu4_20 Eu1_20 133.7(3) . . ?
O_29 Eu4_20 Eu1_20 120.5(3) . . ?
O_28 Eu4_20 Eu1_20 41.8(3) . . ?
O_211 Eu4_20 Eu1_20 44.9(2) . . ?
O_212 Eu4_20 Eu1_20 101.4(2) . . ?
O_213 Eu4_20 Eu1_20 49.4(3) . . ?
Eu3_20 Eu4_20 Eu1_20 59.92(3) . . ?
O_26 Eu4_20 Eu2_20 123.5(4) . . ?
O_29 Eu4_20 Eu2_20 41.5(3) . . ?
O_28 Eu4_20 Eu2_20 126.2(3) . . ?
O_211 Eu4_20 Eu2_20 102.1(3) . . ?
O_212 Eu4_20 Eu2_20 44.7(2) . . ?
O_213 Eu4_20 Eu2_20 52.6(3) . . ?
Eu3_20 Eu4_20 Eu2_20 60.00(3) . . ?
Eu1_20 Eu4_20 Eu2_20 101.61(4) . . ?
C_21 O_21 Eu1_20 137.5(10) . . ?
O_21 C_21 C2_21 108.3(15) . . ?
O_21 C_21 C1_21 108.9(16) . . ?
C2_21 C_21 C1_21 113.2(18) . . ?
C_22 O_22 Eu1_20 134.7(11) . . ?
C1_22 C_22 C2_22 124(2) . . ?
C1_22 C_22 O_22 111.3(19) . . ?
C2_22 C_22 O_22 110(2) . . ?
C_23 O_23 Eu2_20 134.5(10) . . ?
O_23 C_23 C2_23 111.6(17) . . ?
O_23 C_23 C1_23 108.5(17) . . ?
C2_23 C_23 C1_23 116(2) . . ?
C_24 O_24 Eu2_20 139.9(11) . . ?
C1_24 C_24 O_24 109(2) . . ?
C1_24 C_24 C2_24 116(2) . . ?
O_24 C_24 C2_24 109(2) . . ?
C_25 O_25 Eu3_20 174.7(16) . . ?
O_25 C_25 C1_25 112(3) . . ?
O_25 C_25 C2_25 109(2) . . ?
C1_25 C_25 C2_25 116(2) . . ?
C_26 O_26 Eu4_20 177.3(14) . . ?
O_26 C_26 C1_26 108(2) . . ?
O_26 C_26 C2_26 106(2) . . ?
C1_26 C_26 C2_26 118(2) . . ?
C_27 O_27 Eu3_20 130.5(13) . . ?
C_27 O_27 Eu1_20 128.6(13) . . ?
Eu3_20 O_27 Eu1_20 100.5(4) . . ?
O_27 C_27 C1_27 114.8(18) . . ?
O_27 C_27 C2_27 111.5(19) . . ?
C1_27 C_27 C2_27 115(2) . . ?
C_28 O_28 Eu4_20 135.6(11) . . ?
C_28 O_28 Eu1_20 124.0(11) . . ?
Eu4_20 O_28 Eu1_20 99.8(4) . . ?
O_28 C_28 C1_28 108.7(17) . . ?
O_28 C_28 C2_28 108.6(17) . . ?
C1_28 C_28 C2_28 110(2) . . ?
CB_29 O_29 CA_29 30(2) . . ?
CB_29 O_29 Eu4_20 148.5(16) . . ?
CA_29 O_29 Eu4_20 122.4(19) . . ?
CB_29 O_29 Eu2_20 104.5(18) . . ?
CA_29 O_29 Eu2_20 134.2(18) . . ?
Eu4_20 O_29 Eu2_20 100.4(4) . . ?
O_29 CA_29 C2A_29 108(4) . . ?
O_29 CA_29 C1A_29 105(3) . . ?
C2A_29 CA_29 C1A_29 115(4) . . ?
O_29 CB_29 C2B_29 105(4) . . ?
O_29 CB_29 C1B_29 107(3) . . ?
C2B_29 CB_29 C1B_29 102.7(18) . . ?
O_29 CB_29 Eu2_20 49.5(13) . . ?
C2B_29 CB_29 Eu2_20 124(3) . . ?
C1B_29 CB_29 Eu2_20 131(2) . . ?
C_210 O_210 Eu3_20 132.9(10) . . ?
C_210 O_210 Eu2_20 126.7(10) . . ?
Eu3_20 O_210 Eu2_20 100.0(5) . . ?
O_210 C_210 C1_210 109.7(18) . . ?
O_210 C_210 C2_210 109.6(17) . . ?
C1_210 C_210 C2_210 113(2) . . ?
CA_211 O_211 CB_211 28.2(15) . . ?
CA_211 O_211 Eu4_20 131.3(14) . . ?
CB_211 O_211 Eu4_20 121.2(11) . . ?
CA_211 O_211 Eu3_20 131.1(13) . . ?
CB_211 O_211 Eu3_20 122.9(12) . . ?
Eu4_20 O_211 Eu3_20 96.3(3) . . ?
CA_211 O_211 Eu1_20 94.5(18) . . ?
CB_211 O_211 Eu1_20 122.7(14) . . ?
Eu4_20 O_211 Eu1_20 93.5(3) . . ?
Eu3_20 O_211 Eu1_20 92.6(3) . . ?
O_211 CA_211 C1A_211 105(3) . . ?
O_211 CA_211 C2A_211 109(3) . . ?
C1A_211 CA_211 C2A_211 112(4) . . ?
O_211 CA_211 Eu1_20 57.5(13) . . ?
C1A_211 CA_211 Eu1_20 121(3) . . ?
C2A_211 CA_211 Eu1_20 127(3) . . ?
O_211 CB_211 C2B_211 107(2) . . ?
O_211 CB_211 C1B_211 108(2) . . ?
C2B_211 CB_211 C1B_211 108(3) . . ?
C_212 O_212 Eu3_20 127.8(10) . . ?
C_212 O_212 Eu4_20 123.5(10) . . ?
Eu3_20 O_212 Eu4_20 96.6(4) . . ?
C_212 O_212 Eu2_20 113.7(9) . . ?
Eu3_20 O_212 Eu2_20 93.5(4) . . ?
Eu4_20 O_212 Eu2_20 93.4(4) . . ?
O_212 C_212 C1_212 111.7(15) . . ?
O_212 C_212 C2_212 109.1(14) . . ?
C1_212 C_212 C2_212 108.6(16) . . ?
C_213 O_213 Eu3_20 132.9(10) . . ?
C_213 O_213 Eu4_20 131.8(10) . . ?
Eu3_20 O_213 Eu4_20 93.9(4) . . ?
C_213 O_213 Eu1_20 103.1(9) . . ?
Eu3_20 O_213 Eu1_20 87.5(3) . . ?
Eu4_20 O_213 Eu1_20 87.5(3) . . ?
C_213 O_213 Eu2_20 88.6(8) . . ?
Eu3_20 O_213 Eu2_20 84.5(3) . . ?
Eu4_20 O_213 Eu2_20 84.4(3) . . ?
Eu1_20 O_213 Eu2_20 168.3(4) . . ?
O_213 C_213 C1_213 111.3(15) . . ?
O_213 C_213 C2_213 111.2(15) . . ?
C1_213 C_213 C2_213 118.1(16) . . ?
O_213 C_213 Eu2_20 64.9(8) . . ?
C1_213 C_213 Eu2_20 117.5(13) . . ?
C2_213 C_213 Eu2_20 120.5(12) . . ?
O_14 C_14 C2_14 112.6(16) . . ?
O_14 C_14 C1_14 111.6(17) . . ?
C2_14 C_14 C1_14 112.7(18) . . ?
O_15 C_15 C2_15 110(2) . . ?
O_15 C_15 C1_15 112(2) . . ?
C2_15 C_15 C1_15 110(2) . . ?
O_214 C_214 C2_214 111.5(16) . . ?
O_214 C_214 C1_214 112.0(15) . . ?
C2_214 C_214 C1_214 111.3(17) . . ?
C1_215 C_215 C2_215 120(3) . . ?
C1_215 C_215 O_215 102(3) . . ?
C2_215 C_215 O_215 108(2) . . ?

_diffrn_measured_fraction_theta_max     .967
_diffrn_reflns_theta_full              20.82
_diffrn_measured_fraction_theta_full    .967
_refine_diff_density_max    1.038
_refine_diff_density_min   -1.173
_refine_diff_density_rms     .201

#===END
